# Supplementary material
Source: publisher figshare collection journal article supplement (https://frontiersin.figshare.com/ndownloader/files/25592543)
Supplement: Supplementary file 1 [file 25592543]

## Sheet: Supporting data 1
Category	Sub catergory	Food/diet	Biomarker	Biofluid	Analytical technique	Reference(s)
Beverages	Tea	Black tea	(Epi)catechin sulfate	Urine	HPLC-FTMSn and HPLC-TOFMS-SPE-NMR	van der Hooft et al., 2012
Beverages	Tea	Black tea	3’-O-methyl-5-(3′,4′-dihydroxyphenyl)-γ-valerolactone 4’-O-glucuronide	Urine	HPLC-FTMSn and HPLC-TOFMS-SPE-NMR	van der Hooft et al., 2012
Beverages	Tea	Black tea	4’-O-glucuronide, 5-(hydroxyphenyl)-γ-valerolactone sulfate,	Urine	HPLC-FTMSn and HPLC-TOFMS-SPE-NMR	van der Hooft et al., 2012
Beverages	Tea	Black tea	4’-O-methyl-5-(3′,4′-dihydroxyphenyl)-γ-valerolactone 3’-O-glucuronide	Urine	HPLC-FTMSn and HPLC-TOFMS-SPE-NMR	van der Hooft et al., 2012
Beverages	Tea	Black tea	4-hydroxy-5-(3′,4′-dihydroxyphenyl)valeric acid glucuronide	Urine	HPLC-FTMSn and HPLC-TOFMS-SPE-NMR	van der Hooft et al., 2012
Beverages	Tea	Black tea	4-hydroxy-5-(3′,5′-dihydroxyphenyl)valeric acid glucuronide	Urine	HPLC-FTMSn and HPLC-TOFMS-SPE-NMR	van der Hooft et al., 2012
Beverages	Tea	Black tea	4-hydroxy-5-(3′-hydroxyphenyl)valeric acid 3’-O-sulfate	Urine	HPLC-FTMSn and HPLC-TOFMS-SPE-NMR	van der Hooft et al., 2012
Beverages	Tea	Black tea	4-hydroxy-5-(3′-hydroxyphenyl)valeric acid 4’-O-sulfate	Urine	HPLC-FTMSn and HPLC-TOFMS-SPE-NMR	van der Hooft et al., 2012
Beverages	Tea	Black tea	4-hydroxy-5-(dihydroxyphenyl)valeric acid sulfate	Urine	HPLC-FTMSn and HPLC-TOFMS-SPE-NMR	van der Hooft et al., 2012
Beverages	Tea	Black tea	4-hydroxy-5-(phenyl)valeric acid glucuronide	Urine	HPLC-FTMSn and HPLC-TOFMS-SPE-NMR	van der Hooft et al., 2012
Beverages	Tea	Black tea	4-hydroxy-5-(phenyl)valeric acid sulfate	Urine	HPLC-FTMSn and HPLC-TOFMS-SPE-NMR	van der Hooft et al., 2012
Beverages	Tea	Tea	4-O-Methylgallic acid	Urine	LC-MS	Edmands et al., 2015
Beverages	Tea	Black tea	5-(3′,4′,5′-trihydroxyphenyl)-γ-valerolactone 3’-O-glucuronide	Urine	HPLC-FTMSn and HPLC-TOFMS-SPE-NMR	van der Hooft et al., 2012
Beverages	Tea	Black tea	5-(3′,4′,5′-trihydroxyphenyl)-γ-valerolactone 3’-O-sulfate	Urine	HPLC-FTMSn and HPLC-TOFMS-SPE-NMR	van der Hooft et al., 2012
Beverages	Tea	Black tea	5-(3′,4′,5′-trihydroxyphenyl)-γ-valerolactone 4’-O-glucuronide	Urine	HPLC-FTMSn and HPLC-TOFMS-SPE-NMR	van der Hooft et al., 2012
Beverages	Tea	Black tea	5-(3′,4′,5′-trihydroxyphenyl)-γ-valerolactone 4’-O-sulfate	Urine	HPLC-FTMSn and HPLC-TOFMS-SPE-NMR	van der Hooft et al., 2012
Beverages	Tea	Black tea	5-(3′,4′,5′-trihydroxyphenyl)-γ-valerolactone sulfoglucuronide	Urine	HPLC-FTMSn and HPLC-TOFMS-SPE-NMR	van der Hooft et al., 2012
Beverages	Tea	Black tea	5-(3′,4′-dihydroxyphenyl)-γ-valerolactone 3’-O-glucuronide	Urine	HPLC-FTMSn and HPLC-TOFMS-SPE-NMR	van der Hooft et al., 2012
Beverages	Tea	Black tea	5-(3′,4′-dihydroxyphenyl)-γ-valerolactone 4’-O-glucuronide	Urine	HPLC-FTMSn and HPLC-TOFMS-SPE-NMR	van der Hooft et al., 2012
Beverages	Tea	Black tea	5-(3′,4′-dihydroxyphenyl)-γ-valerolactone sulfate	Urine	HPLC-FTMSn and HPLC-TOFMS-SPE-NMR	van der Hooft et al., 2012
Beverages	Tea	Black tea	5-(3′,5′-dihydroxyphenyl)-γ-valerolactone 3’-O-glucuronide	Urine	HPLC-FTMSn and HPLC-TOFMS-SPE-NMR	van der Hooft et al., 2012
Beverages	Tea	Black tea	5-(3′,5′-dihydroxyphenyl)-γ-valerolactone 3’-O-sulfate	Urine	HPLC-FTMSn and HPLC-TOFMS-SPE-NMR	van der Hooft et al., 2012
Beverages	Tea	Black tea	5-(3′-hydroxyphenyl)-γ-valerolactone 3’-O-glucuronide	Urine	HPLC-FTMSn and HPLC-TOFMS-SPE-NMR	van der Hooft et al., 2012
Beverages	Tea	Tea (mountain) (Sideritis scardica)	Apigenin diglucuronide	Urine	HPLC-ESI-MS/MS	Stanoeva and Stefova, 2013
Beverages	Tea	Tea (mountain) (Sideritis scardica)	Apigenin disulfate	Urine	HPLC-ESI-MS/MS	Stanoeva and Stefova, 2013
Beverages	Tea	Tea (mountain) (Sideritis scardica)	Apigenin glucuronide	Urine	HPLC-ESI-MS/MS	Stanoeva and Stefova, 2013
Beverages	Tea	Tea (mountain) (Sideritis scardica)	Apigenin glucuronide sulfate	Urine	HPLC-ESI-MS/MS	Stanoeva and Stefova, 2013
Beverages	Tea	Tea (mountain) (Sideritis scardica)	Caffeic acid	Urine	HPLC-ESI-MS/MS	Stanoeva and Stefova, 2013
Beverages	Tea	Tea (mountain) (Sideritis scardica)	Caffeic acid glucuronide sulfate	Urine	HPLC-ESI-MS/MS	Stanoeva and Stefova, 2013
Beverages	Tea	Tea (mountain) (Sideritis scardica)	Caffeoylquinic acid disulfate	Urine	HPLC-ESI-MS/MS	Stanoeva and Stefova, 2013
Beverages	Tea	Tea (mountain) (Sideritis scardica)	Caffeoylquinic acid glucuronide	Urine	HPLC-ESI-MS/MS	Stanoeva and Stefova, 2013
Beverages	Tea	Tea (mountain) (Sideritis scardica)	Caffeoylquinic acid sulfate	Urine	HPLC-ESI-MS/MS	Stanoeva and Stefova, 2013
Beverages	Tea	Tea (mountain) (Sideritis scardica)	Coumaric acid glucuronide	Urine	HPLC-ESI-MS/MS	Stanoeva and Stefova, 2013
Beverages	Tea	Black tea	dihydronaringenin sulfate	Urine	HPLC-FTMSn and HPLC-TOFMS-SPE-NMR	van der Hooft et al., 2012
Beverages	Tea	Tea	Dihydroxyphenyl-gamma-valerolactone glucuronide	Urine	LC-MS	Edmands et al., 2015
Beverages	Tea	Tea	Dihydroxyphenyl-gamma-valerolactone sulfate	Urine	LC-MS	Edmands et al., 2015
Beverages	Tea	Tea (mountain) (Sideritis scardica)	Dimethylcaffeic acid glucuronide	Urine	HPLC-ESI-MS/MS	Stanoeva and Stefova, 2013
Beverages	Tea	Tea (mountain) (Sideritis scardica)	Dimethylferulic acid glucuronide	Urine	HPLC-ESI-MS/MS	Stanoeva and Stefova, 2013
Beverages	Tea	Tea (mountain) (Sideritis scardica)	Dimethylferulic acid sulfate	Urine	HPLC-ESI-MS/MS	Stanoeva and Stefova, 2013
Beverages	Tea	Tea (mountain) (Sideritis scardica)	Dimethylferuloylquinic acid glucuronide	Urine	HPLC-ESI-MS/MS	Stanoeva and Stefova, 2013
Beverages	Tea	Black tea	di-O-methyl(epi)gallocatechin sulfate	Urine	HPLC-FTMSn and HPLC-TOFMS-SPE-NMR	van der Hooft et al., 2012
Beverages	Tea	Tea (mountain) (Sideritis scardica)	Ferulic acid glucuronide	Urine	HPLC-ESI-MS/MS	Stanoeva and Stefova, 2013
Beverages	Tea	Tea (mountain) (Sideritis scardica)	Ferulic acid glucuronide sulfate	Urine	HPLC-ESI-MS/MS	Stanoeva and Stefova, 2013
Beverages	Tea	Tea (mountain) (Sideritis scardica)	Ferulic acid sulfate	Urine	HPLC-ESI-MS/MS	Stanoeva and Stefova, 2013
Beverages	Tea	Tea (mountain) (Sideritis scardica)	Feruloylquinic acid disulfate	Urine	HPLC-ESI-MS/MS	Stanoeva and Stefova, 2013
Beverages	Tea	Tea (mountain) (Sideritis scardica)	Feruloylquinic acid glucuronide	Urine	HPLC-ESI-MS/MS	Stanoeva and Stefova, 2013
Beverages	Tea	Black tea	hippuric acid	Urine	HPLC-FTMSn and HPLC-TOFMS-SPE-NMR	van der Hooft et al., 2012
Beverages	Tea	Tea	Hydroxyphenylvaleric acid glucuronide	Urine	LC-MS	Edmands et al., 2015
Beverages	Tea	Tea (mountain) (Sideritis scardica)	Hypolaetin diglucuronide	Urine	HPLC-ESI-MS/MS	Stanoeva and Stefova, 2013
Beverages	Tea	Tea (mountain) (Sideritis scardica)	Hypolaetin glucuronide	Urine	HPLC-ESI-MS/MS	Stanoeva and Stefova, 2013
Beverages	Tea	Tea (mountain) (Sideritis scardica)	Hypolaetin glucuronide sulfate	Urine	HPLC-ESI-MS/MS	Stanoeva and Stefova, 2013
Beverages	Tea	Tea (mountain) (Sideritis scardica)	Hypolaetin sulfate	Urine	HPLC-ESI-MS/MS	Stanoeva and Stefova, 2013
Beverages	Tea	Black tea	indole-3-acetic-acid glucuronide	Urine	HPLC-FTMSn and HPLC-TOFMS-SPE-NMR	van der Hooft et al., 2012
Beverages	Tea	Black tea	indole-3-carboxylic acid glucuronide	Urine	HPLC-FTMSn and HPLC-TOFMS-SPE-NMR	van der Hooft et al., 2012
Beverages	Tea	Tea (mountain) (Sideritis scardica)	Isoscutellarein glucuronide	Urine	HPLC-ESI-MS/MS	Stanoeva and Stefova, 2013
Beverages	Tea	Tea (mountain) (Sideritis scardica)	Isoscutellarein glucuronide sulfate	Urine	HPLC-ESI-MS/MS	Stanoeva and Stefova, 2013
Beverages	Tea	Tea (mountain) (Sideritis scardica)	Isoscutellarein sulfate	Urine	HPLC-ESI-MS/MS	Stanoeva and Stefova, 2013
Beverages	Tea	Tea	Methyl(epi)catechin sulfate	Urine	LC-MS	Edmands et al., 2015
Beverages	Tea	Tea	Methylgallic acid sulfate	Urine	LC-MS	Edmands et al., 2015
Beverages	Tea	Tea (mountain) (Sideritis scardica)	Methylhypolaetin glucuronide	Urine	HPLC-ESI-MS/MS	Stanoeva and Stefova, 2013
Beverages	Tea	Tea (mountain) (Sideritis scardica)	Methylhypolaetin glucuronide pentose	Urine	HPLC-ESI-MS/MS	Stanoeva and Stefova, 2013
Beverages	Tea	Tea (mountain) (Sideritis scardica)	Methylhypolaetin sulfate	Urine	HPLC-ESI-MS/MS	Stanoeva and Stefova, 2013
Beverages	Tea	Tea (mountain) (Sideritis scardica)	Methylisoscutellarein diglucuronide	Urine	HPLC-ESI-MS/MS	Stanoeva and Stefova, 2013
Beverages	Tea	Tea (mountain) (Sideritis scardica)	Methylisoscutellarein disulfate	Urine	HPLC-ESI-MS/MS	Stanoeva and Stefova, 2013
Beverages	Tea	Tea (mountain) (Sideritis scardica)	Methylisoscutellarein glucuronide	Urine	HPLC-ESI-MS/MS	Stanoeva and Stefova, 2013
Beverages	Tea	Black tea	O-methyl(epi)catechin sulfate	Urine	HPLC-FTMSn and HPLC-TOFMS-SPE-NMR	van der Hooft et al., 2012
Beverages	Tea	Black tea	O-methyl(epi)gallocatechin sulfate	Urine	HPLC-FTMSn and HPLC-TOFMS-SPE-NMR	van der Hooft et al., 2012
Beverages	Tea	Black tea	O-methyl-4-hydroxy-5-(3′,4′,5′-trihydroxyphenyl)valeric acid glucuronide	Urine	HPLC-FTMSn and HPLC-TOFMS-SPE-NMR	van der Hooft et al., 2012
Beverages	Tea	Black tea	O-methyl-4-hydroxy-5-(3′,4′-dihydroxyphenyl)valeric acid glucuronide	Urine	HPLC-FTMSn and HPLC-TOFMS-SPE-NMR	van der Hooft et al., 2012
Beverages	Tea	Black tea	O-methyl-4-hydroxy-5-(3′,5′-dihydroxyphenyl)valeric acid glucuronide	Urine	HPLC-FTMSn and HPLC-TOFMS-SPE-NMR	van der Hooft et al., 2012
Beverages	Tea	Black tea	O-methyl-4-hydroxy-5-(dihydroxyphenyl)valeric acid sulfate	Urine	HPLC-FTMSn and HPLC-TOFMS-SPE-NMR	van der Hooft et al., 2012
Beverages	Tea	Black tea	O-methyl-4-hydroxy-5-(hydroxyphenyl)valeric acid sulfate	Urine	HPLC-FTMSn and HPLC-TOFMS-SPE-NMR	van der Hooft et al., 2012
Beverages	Tea	Black tea	O-methyl-5-(3′,4′,5′-trihydroxyphenyl)-γ-valerolactone 3′/4’-O-glucuronide	Urine	HPLC-FTMSn and HPLC-TOFMS-SPE-NMR	van der Hooft et al., 2012
Beverages	Tea	Black tea	O-methyl-5-(3′,4′,5′-trihydroxyphenyl)-γ-valerolactone 3′/5’-O-glucuronide	Urine	HPLC-FTMSn and HPLC-TOFMS-SPE-NMR	van der Hooft et al., 2012
Beverages	Tea	Black tea	O-methyl-5-(3′,4′,5′-trihydroxyphenyl)-γ-valerolactone-O-sulfate	Urine	HPLC-FTMSn and HPLC-TOFMS-SPE-NMR	van der Hooft et al., 2012
Beverages	Tea	Black tea	O-methyl-5-(3′,5′-dihydroxyphenyl)-γ-valerolactone glucuronide	Urine	HPLC-FTMSn and HPLC-TOFMS-SPE-NMR	van der Hooft et al., 2012
Beverages	Tea	Black tea	O-methyl-5-(3′,5′-dihydroxyphenyl)-γ-valerolactone sulfate	Urine	HPLC-FTMSn and HPLC-TOFMS-SPE-NMR	van der Hooft et al., 2012
Beverages	Tea	Black tea	O-methylcatechin sulfate	Urine	HPLC-FTMSn and HPLC-TOFMS-SPE-NMR	van der Hooft et al., 2012
Beverages	Tea	Black tea	p-cresol glucuronide	Urine	HPLC-FTMSn and HPLC-TOFMS-SPE-NMR	van der Hooft et al., 2012
Beverages	Tea	Black tea	p-cresol sulfate	Urine	HPLC-FTMSn and HPLC-TOFMS-SPE-NMR	van der Hooft et al., 2012
Beverages	Tea	Black tea	phenylacetylglycine	Urine	HPLC-FTMSn and HPLC-TOFMS-SPE-NMR	van der Hooft et al., 2012
Beverages	Tea	Black tea	pyrogallol 1-O-sulfate	Urine	HPLC-FTMSn and HPLC-TOFMS-SPE-NMR	van der Hooft et al., 2012
Beverages	Tea	Black tea	pyrogallol 2-O-glucuronide	Urine	HPLC-FTMSn and HPLC-TOFMS-SPE-NMR	van der Hooft et al., 2012
Beverages	Tea	Black tea	pyrogallol 2-O-sulfate	Urine	HPLC-FTMSn and HPLC-TOFMS-SPE-NMR	van der Hooft et al., 2012
Beverages	Tea	Tea	Pyrogallol sulfate	Urine	LC-MS	Edmands et al., 2015
Beverages	Tea	Tea (mountain) (Sideritis scardica)	Quinic acid glucuronide	Urine	HPLC-ESI-MS/MS	Stanoeva and Stefova, 2013
Beverages	Tea	Tea (mountain) (Sideritis scardica)	Quinic acid glucuronide sulfate	Urine	HPLC-ESI-MS/MS	Stanoeva and Stefova, 2013
Beverages	Tea	Tea (mountain) (Sideritis scardica)	Quinic acid trisulfate	Urine	HPLC-ESI-MS/MS	Stanoeva and Stefova, 2013
Beverages	Tea	Black tea	urolithin A-3-O-glucuronide	Urine	HPLC-FTMSn and HPLC-TOFMS-SPE-NMR	van der Hooft et al., 2012
Beverages	Tea	Black tea	urolithin A-8-O-glucuronide	Urine	HPLC-FTMSn and HPLC-TOFMS-SPE-NMR	van der Hooft et al., 2012
Beverages	Tea	Black tea	urolithin A-sulfoglucuronide	Urine	HPLC-FTMSn and HPLC-TOFMS-SPE-NMR	van der Hooft et al., 2012
Beverages	Tea	Black tea	urolithin B-O-glucuronide	Urine	HPLC-FTMSn and HPLC-TOFMS-SPE-NMR	van der Hooft et al., 2012
Beverages	Tea	Black tea	vanillic acid-4-Oglucuronide	Urine	HPLC-FTMSn and HPLC-TOFMS-SPE-NMR	van der Hooft et al., 2012
Beverages	Tea	Black tea	vanillic acid-4-O-sulfate	Urine	HPLC-FTMSn and HPLC-TOFMS-SPE-NMR	van der Hooft et al., 2012
Beverages	Tea	Black tea	vanilloylglycine	Urine	HPLC-FTMSn and HPLC-TOFMS-SPE-NMR	van der Hooft et al., 2012
Beverages	Coffee	Coffee	1,3 or 3,7 dimethyluric acid	Urine	UPLC-QTof-MS	Rothwell et al., 2014
Beverages	Coffee	Coffee	1,3-Dimethyluric acid	Urine	UPLC-MS/MS	Playdon et al., 2016
Beverages	Coffee	Coffee	1,7-Dimethyluric acid	Urine	UPLC-QTof-MS	Rothwell et al., 2014
Beverages	Coffee	Coffee	1-Methyluric acid	Urine	UPLC-QTof-MS	Rothwell et al., 2014
Beverages	Coffee	Coffee	1-Methylxanthine	Urine	UPLC-QTof-MS	Rothwell et al., 2014
Beverages	Coffee	Instant coffee	3 and 4- Caffeoylquinic acid lactone sulfate	Urine	HPLC-PDA-MSn	Stalmach et al., 2014
Beverages	Coffee	Instant coffee	3-, 4- and 5-Feruloylquinic acid,	Urine	HPLC-PDA-MSn	Stalmach et al., 2014
Beverages	Coffee	Coffee	3-Hydroxyhippuric acid	Urine	UPLC-QTof-MS	Rothwell et al., 2014
Beverages	Coffee	Coffee	5-Acetylamino-6-formylamino-3-methyluracil (AFMU)	Urine	UPLC-QTof-MS	Rothwell et al., 2014
Beverages	Coffee	Coffee	AAMU	Urine	UPLC-MS/MS	Playdon et al., 2016
Beverages	Coffee	Coffee	AFMU	Urine	UPLC-MS/MS	Playdon et al., 2016
Beverages	Coffee	Coffee	Atractyligenin glucuronide	Urine	UPLC-QTof-MS	Rothwell et al., 2014
Beverages	Coffee	Coffee	Caffeic acid sulfate	Urine	LC-MS	Edmands et al., 2015
Beverages	Coffee	Coffee	Caffeine	Urine	UPLC-QTof-MS	Rothwell et al., 2014
Beverages	Coffee	Coffee	Chlorogenic acid	Urine	LC-MS	Edmands et al., 2015
Beverages	Coffee	Coffee	Cyclo(isoleucyl-prolyl)	Urine	UPLC-QTof-MS	Rothwell et al., 2014
Beverages	Coffee	Coffee	Dihydrocaffeic acid	Urine	FIE-MS	Lloyd et al 2013
Beverages	Coffee	Coffee	dihydrocaffeic acid 3-glucuronide	Urine	FIE-MS	Lloyd et al 2013
Beverages	Coffee	Coffee	Dihydrocaffeic acid sulfate	Urine	LC-MS	Edmands et al., 2015
Beverages	Coffee	Coffee	Dihydroferulic acid glucuronide	Urine	LC-MS	Edmands et al., 2015
Beverages	Coffee	Coffee	Dihydroferulic acid sulfate	Urine	LC-MS	Edmands et al., 2015
Beverages	Coffee	Coffee	Dimethylxanthine (Paraxanthine or Theophylline) glucuronide	Urine	UPLC-QTof-MS	Rothwell et al., 2014
Beverages	Coffee	Coffee	Ethylcatechol glucuronide	Urine	LC-MS	Edmands et al., 2015
Beverages	Coffee	Coffee	Ferulic acid glucuronide	Urine	LC-MS	Edmands et al., 2015
Beverages	Coffee	Coffee	Ferulic acid sulfate	Urine	LC-MS	Edmands et al., 2015
Beverages	Coffee	Coffee	Feruloylquinic acid	Urine	LC-MS	Edmands et al., 2015
Beverages	Coffee	Coffee	Feruloylquinic acid glucuronide	Urine	LC-MS	Edmands et al., 2015
Beverages	Coffee	Coffee	Furoylglycine	Urine	NMR	Heinzmann et al., 2015
Beverages	Coffee	Coffee	Guaiacol sulfate	Urine	LC-MS	Edmands et al., 2015
Beverages	Coffee	Coffee	Hippuric acid	Urine	UPLC-QTof-MS	Rothwell et al., 2014
Beverages	Coffee	Instant coffee	isoferulic acid-3-glucuronide	Urine	HPLC-PDA-MSn	Stalmach et al., 2014
Beverages	Coffee	Coffee	Kahweol oxide glucuronide	Urine	UPLC-QTof-MS	Rothwell et al., 2014
Beverages	Coffee	Coffee	m-Coumaric acid sulfate	Urine	LC-MS	Edmands et al., 2015
Beverages	Coffee	Coffee	N-(2-Furoyl)glycine	Urine	UPLC-MS/MS	Playdon et al., 2016
Beverages	Coffee	Coffee	Nicotinic acid	Urine	GC-MS	Playdon et al., 2016
Beverages	Coffee	Coffee	N-Methylpyridinium	Urine	UPLC/ToF-MS	Lang et al., 2011
Beverages	Coffee	Coffee	Paraxanthine	Urine	UPLC-QTof-MS	Rothwell et al., 2014
Beverages	Coffee	Coffee	p-Coumaric acid sulfate	Urine	LC-MS	Edmands et al., 2015
Beverages	Coffee	Coffee	p-Hydroxyphenyllactic acid	Urine	LC-MS	Edmands et al., 2015
Beverages	Coffee	Coffee	Quinic acid	Urine	GC-MS	Playdon et al., 2016
Beverages	Coffee	Coffee	Theophylline	Urine	UPLC-MS/MS	Playdon et al., 2016
Beverages	Coffee	Coffee	Trigonelline	Urine	UPLC/ToF-MS	Lang et al., 2011
Beverages	Coffee	Coffee	Trimethyluric acid	Urine	UPLC-QTof-MS	Rothwell et al., 2014
Confectionary/ Sweetened drinks	Cocoa products/chocolate	Cocoa- containing products	(Epi)catechin glucuronide	Urine	UPLC-HDMS	Martin et al., 2012
Confectionary/ Sweetened drinks	Cocoa products/chocolate	Cocoa- containing products	(Epi)catechin methylated sulfate	Urine	UPLC-HDMS	Martin et al., 2012
Confectionary/ Sweetened drinks	Cocoa products/chocolate	Cocoa	(Epi)catechin sulfoglucuronide	Urine	HPLC-hybrid quadrupole TOF	Llorach et al., 2013
Confectionary/ Sweetened drinks	Cocoa products/chocolate	Cocoa	(Epi)catechin sulphate	Urine	HPLC-hybrid quadrupole TOF	Garcia-Aloy et al., 2015b
Confectionary/ Sweetened drinks	Cocoa products/chocolate	Cocoa	1,3,7-Methyluric acid	Urine	HPLC-DAD	Martínez-López et al., 2014
Confectionary/ Sweetened drinks	Cocoa products/chocolate	Cocoa	1,3-Methyluric acid	Urine	HPLC-DAD	Martínez-López et al., 2014
Confectionary/ Sweetened drinks	Cocoa products/chocolate	Cocoa	1,7-Methyluric acid	Urine	HPLC-DAD	Martínez-López et al., 2014
Confectionary/ Sweetened drinks	Cocoa products/chocolate	Cocoa	1-Methyluric acid	Urine	HPLC-DAD	Martínez-López et al., 2014
Confectionary/ Sweetened drinks	Cocoa products/chocolate	Cocoa	1-Methylxanthine	Urine	HPLC-DAD	Martínez-López et al., 2014
Confectionary/ Sweetened drinks	Cocoa products/chocolate	Cocoa- containing products	2S-1-(3-4-dihydroxyphenyl)-3-(2-4-6-trihydroxyphenyl)-propan-2-ol methylated sulfate	Urine	UPLC-HDMS	Martin et al., 2012
Confectionary/ Sweetened drinks	Cocoa products/chocolate	Cocoa	3,5-diethyl-2-methylpyrazine	Urine	HPLC-hybrid quadrupole TOF	Llorach et al., 2013
Confectionary/ Sweetened drinks	Cocoa products/chocolate	Cocoa	3,7-dimethyluric acid	Urine	HPLC-hybrid quadrupole TOF	Llorach et al., 2013
Confectionary/ Sweetened drinks	Cocoa products/chocolate	Cocoa	3,7-Methyluric acid	Urine	HPLC-DAD	Martínez-López et al., 2014
Confectionary/ Sweetened drinks	Cocoa products/chocolate	Cocoa	3-methoxy-4-hydroxyphenylvalerolactone	Urine	HPLC-hybrid quadrupole TOF	Llorach et al., 2013
Confectionary/ Sweetened drinks	Cocoa products/chocolate	Cocoa	3-methyluric acid	Urine	HPLC-hybrid quadrupole TOF	Llorach et al., 2013
Confectionary/ Sweetened drinks	Cocoa products/chocolate	Cocoa	3-methylxanthine	Urine	LC-q-TOF MS	Llorach et al., 2010b
Confectionary/ Sweetened drinks	Cocoa products/chocolate	Cocoa- containing products	4-Hydroxy-(3',4'-dihydroxyphenyl)valeric acid sulfate	Urine	LC-MS	Edmands et al., 2015
Confectionary/ Sweetened drinks	Cocoa products/chocolate	Cocoa- containing products	5-(3,4-dihydroxyphenyl)-valeric-acid glucuronide	Urine	UPLC-HDMS	Martin et al., 2012
Confectionary/ Sweetened drinks	Cocoa products/chocolate	Cocoa- containing products	5-(3,4-dihydroxyphenyl)-valeric-acid methylated sulfate	Urine	UPLC-HDMS	Martin et al., 2012
Confectionary/ Sweetened drinks	Cocoa products/chocolate	Cocoa- containing products	5-(3,4-dihydroxyphenyl)-valeric-acid sulfate	Urine	UPLC-HDMS	Martin et al., 2012
Confectionary/ Sweetened drinks	Cocoa products/chocolate	Cocoa- containing products	5-(3-4-dihydroxyphenyl)-valerolactone	Urine	UPLC-HDMS	Martin et al., 2012
Confectionary/ Sweetened drinks	Cocoa products/chocolate	Cocoa- containing products	5-(3-4-dihydroxyphenyl)-valerolactone glucuronide	Urine	UPLC-HDMS	Martin et al., 2012
Confectionary/ Sweetened drinks	Cocoa products/chocolate	Cocoa- containing products	5-(3-4-dihydroxyphenyl)-valerolactone methylated glucoronide	Urine	UPLC-HDMS	Martin et al., 2012
Confectionary/ Sweetened drinks	Cocoa products/chocolate	Cocoa- containing products	5-(3-4-dihydroxyphenyl)-valerolactone methylated sulfate	Urine	UPLC-HDMS	Martin et al., 2012
Confectionary/ Sweetened drinks	Cocoa products/chocolate	Cocoa- containing products	5-(3-4-dihydroxyphenyl)-valerolactone sulfate	Urine	UPLC-HDMS	Martin et al., 2012
Confectionary/ Sweetened drinks	Cocoa products/chocolate	Cocoa- containing products	5-(3-hydroxyphenyl)-valerolactone glucuronide	Urine	UPLC-HDMS	Martin et al., 2012
Confectionary/ Sweetened drinks	Cocoa products/chocolate	Cocoa- containing products	5-(3-hydroxyphenyl)-valerolactone sulfate	Urine	UPLC-HDMS	Martin et al., 2012
Confectionary/ Sweetened drinks	Cocoa products/chocolate	Cocoa- containing products	5-(4-hydroxy(3-4-dihydroxyphenyl)-valeric-acid	Urine	UPLC-HDMS	Martin et al., 2012
Confectionary/ Sweetened drinks	Cocoa products/chocolate	Cocoa- containing products	5-(4-hydroxy(3-4-dihydroxyphenyl)-valeric-acid glucuronide	Urine	UPLC-HDMS	Martin et al., 2012
Confectionary/ Sweetened drinks	Cocoa products/chocolate	Cocoa- containing products	5-(4-hydroxy(3-4-dihydroxyphenyl)-valeric-acid methylated glucuronide	Urine	UPLC-HDMS	Martin et al., 2012
Confectionary/ Sweetened drinks	Cocoa products/chocolate	Cocoa- containing products	5-(4-hydroxy(3-4-dihydroxyphenyl)-valeric-acid methylated sulfate	Urine	UPLC-HDMS	Martin et al., 2012
Confectionary/ Sweetened drinks	Cocoa products/chocolate	Cocoa- containing products	5-(4-hydroxy(3-4-dihydroxyphenyl)-valeric-acid sulfate	Urine	UPLC-HDMS	Martin et al., 2012
Confectionary/ Sweetened drinks	Cocoa products/chocolate	Cocoa	5-(hydroxy-methoxy-phenyl)-γ -valerolactone sulfate	Urine	HPLC-hybrid quadrupole TOF	Llorach et al., 2013
Confectionary/ Sweetened drinks	Cocoa products/chocolate	cocoa	7-methyluric acid	Urine	HPLC-hybrid quadrupole TOF	Llorach et al., 2013
Confectionary/ Sweetened drinks	Cocoa products/chocolate	Cocoa	7-methylxanthine	Urine	LC-q-TOF MS	Llorach et al., 2010b
Confectionary/ Sweetened drinks	Cocoa products/chocolate	cocoa	AMMU 6-Amino-5-[N-methylformylamino]-1-methyluracil	Urine	HPLC-hybrid quadrupole TOF	Llorach et al., 2013
Confectionary/ Sweetened drinks	Cocoa products/chocolate	Cocoa	Aspartyl-phenylalanine	Urine	HPLC-hybrid quadrupole TOF	Garcia-Aloy et al., 2015b
Confectionary/ Sweetened drinks	Cocoa products/chocolate	Cocoa	Cyclo(propylalanyl)	Urine	HPLC-hybrid quadrupole TOF	Garcia-Aloy et al., 2015b
Confectionary/ Sweetened drinks	Cocoa products/chocolate	Cocoa	Cyclo(propylalanyl)	Urine	HPLC-hybrid quadrupole TOF	Llorach et al., 2013
Confectionary/ Sweetened drinks	Cocoa products/chocolate	Cocoa	DHPV (5-(3,4-dihydroxyphenyl)-γ -valerolactone) glucuronide	Urine	LC-q-TOF MS	Llorach et al., 2010b
Confectionary/ Sweetened drinks	Cocoa products/chocolate	Cocoa	DHPV (5-(3,4-dihydroxyphenyl)-γ -valerolactone) sulfate	Urine	HPLC-hybrid quadrupole TOF	Llorach et al., 2013
Confectionary/ Sweetened drinks	Cocoa products/chocolate	Cocoa	DHPV (5-(3,4-dihydroxyphenyl)-γ -valerolactone) sulfoglucuronide	Urine	HPLC-hybrid quadrupole TOF	Llorach et al., 2013
Confectionary/ Sweetened drinks	Cocoa products/chocolate	Cocoa	furoylglycine	Urine	HPLC-hybrid quadrupole TOF	Llorach et al., 2013
Confectionary/ Sweetened drinks	Cocoa products/chocolate	Cocoa	HDHPVA (4-hydroxy-5-(dihydroxyphenyl)-valeric acid)	Urine	HPLC-hybrid quadrupole TOF	Garcia-Aloy et al., 2015b
Confectionary/ Sweetened drinks	Cocoa products/chocolate	Cocoa	HDHPVA (4-hydroxy-5-(dihydroxyphenyl)-valeric acid) glucuronide	Urine	HPLC-hybrid quadrupole TOF	Garcia-Aloy et al., 2015b
Confectionary/ Sweetened drinks	Cocoa products/chocolate	Cocoa	HDHPVA (4-hydroxy-5-(dihydroxyphenyl)-valeric acid) glucuronide	Urine	HPLC-hybrid quadrupole TOF	Llorach et al., 2013
Confectionary/ Sweetened drinks	Cocoa products/chocolate	Cocoa	HDHPVA (4-hydroxy-5-(dihydroxyphenyl)-valeric acid) sulfate	Urine	HPLC-hybrid quadrupole TOF	Llorach et al., 2013
Confectionary/ Sweetened drinks	Cocoa products/chocolate	Cocoa	HHMPVA (4-hydroxy-5-(hydroxy-methoxyphenyl)-valeric acid) glucuronide	Urine	HPLC-hybrid quadrupole TOF	Llorach et al., 2013
Confectionary/ Sweetened drinks	Cocoa products/chocolate	Cocoa	HHMPVA (4-hydroxy-5-(hydroxy-methoxyphenyl)-valeric acid) sulphate	Urine	HPLC-hybrid quadrupole TOF	Garcia-Aloy et al., 2015b
Confectionary/ Sweetened drinks	Cocoa products/chocolate	Cocoa	HHPVA (4-hydroxy-5-(hydroxyphenyl)-valeric acid) sulfate	Urine	HPLC-hybrid quadrupole TOF	Llorach et al., 2013
Confectionary/ Sweetened drinks	Cocoa products/chocolate	Cocoa	HPV (Hydroxyphenylvalerolactone) sulfate	Urine	HPLC-hybrid quadrupole TOF	Llorach et al., 2013
Confectionary/ Sweetened drinks	Cocoa products/chocolate	Cocoa	HPV (Hydroxyphenyl-γ-valerolactone) glucuronide	Urine	HPLC-hybrid quadrupole TOF	Llorach et al., 2013
Confectionary/ Sweetened drinks	Cocoa products/chocolate	Cocoa	HPVA (4-hydroxy-5-(phenyl)-valeric acid) sulfate	Urine	HPLC-hybrid quadrupole TOF	Llorach et al., 2013
Confectionary/ Sweetened drinks	Cocoa products/chocolate	Cocoa	Hydroxynicotinic acid	Urine	HPLC-hybrid quadrupole TOF	Llorach et al., 2013
Confectionary/ Sweetened drinks	Cocoa products/chocolate	Cocoa	Methyl-(epi)catechin sulfate	Urine	HPLC-hybrid quadrupole TOF	Llorach et al., 2013
Confectionary/ Sweetened drinks	Cocoa products/chocolate	Cocoa	Methylguanine	Urine	LC-q-TOF MS	Llorach et al., 2010b
Confectionary/ Sweetened drinks	Cocoa products/chocolate	Cocoa	MHPV (Methoxyhydroxyphenylvalerolactone)	Urine	HPLC-hybrid quadrupole TOF	Garcia-Aloy et al., 2015b
Confectionary/ Sweetened drinks	Cocoa products/chocolate	Cocoa	MHPV (Methoxyhydroxyphenylvalerolactone) glucuronide	Urine	HPLC-hybrid quadrupole TOF	Llorach et al., 2013
Confectionary/ Sweetened drinks	Cocoa products/chocolate	Cocoa	N-[4-hydroxy-3-methoxy-E-cinnamoyl]-L-aspartic acid	Urine	HPLC-hybrid quadrupole TOF	Llorach et al., 2013
Confectionary/ Sweetened drinks	Cocoa products/chocolate	Cocoa	N-[4-hydroxycinnamoyl]-L-aspartic acid	Urine	HPLC-hybrid quadrupole TOF	Llorach et al., 2013
Confectionary/ Sweetened drinks	Cocoa products/chocolate	Cocoa	Theobromine	Urine	LC-q-TOF MS	Llorach et al., 2010b
Confectionary/ Sweetened drinks	Cocoa products/chocolate	Cocoa	Vanillic acid	Urine	HPLC-hybrid quadrupole TOF	Garcia-Aloy et al., 2015b
Confectionary/ Sweetened drinks	Cocoa products/chocolate	Cocoa	Vanillic acid glucuronide	Urine	HPLC-hybrid quadrupole TOF	Llorach et al., 2013
Confectionary/ Sweetened drinks	Cocoa products/chocolate	Cocoa	Vanillic acid sulfoglucuronide	Urine	HPLC-hybrid quadrupole TOF	Llorach et al., 2013
Confectionary/ Sweetened drinks	Cocoa products/chocolate	Cocoa	Vanillin sulphate	Urine	HPLC-hybrid quadrupole TOF	Garcia-Aloy et al., 2015b
Confectionary/ Sweetened drinks	Cocoa products/chocolate	Cocoa	Vanilloylglycine	Urine	LC-q-TOF MS	Llorach et al., 2010b
Confectionary/ Sweetened drinks	Cocoa products/chocolate	Cocoa	Xanthine	Urine	HPLC-hybrid quadrupole TOF	Garcia-Aloy et al., 2015b
Confectionary/ Sweetened drinks	Cocoa products/chocolate	Cocoa	xanthurenic acid	Urine	LC-q-TOF MS	Llorach et al., 2010b
Confectionary/ Sweetened drinks	Sugar sweetened soft drinks /confectionary	Soft drinks and confectionary (and citrus)	dihydroperillic acid glucuronide	Urine	UPLC-ESI-QTof	Andersen et al., 2014a
Confectionary/ Sweetened drinks	Sugar sweetened soft drinks /confectionary	Soft drinks and confectionary (and citrus)	limonene-1,2-diol glucuronide	Urine	UPLC-ESI-QTof	Andersen et al., 2014a
Confectionary/ Sweetened drinks	Sugar sweetened soft drinks /confectionary	Soft drinks and confectionary (and citrus)	limonene-8,9-diol-glucuronide	Urine	UPLC-ESI-QTof	Andersen et al., 2014a
Confectionary/ Sweetened drinks	Sugar sweetened soft drinks /confectionary	Soft drinks and confectionary (and citrus)	perillic acid glucuronide	Urine	UPLC-ESI-QTof	Andersen et al., 2014a
Confectionary/ Sweetened drinks	Sugar sweetened soft drinks /confectionary	Soft drinks and confectionary (and citrus)	perillic acid-8,9-diol-glucuronide	Urine	UPLC-ESI-QTof	Andersen et al., 2014a
Confectionary/ Sweetened drinks	Sugar sweetened soft drinks /confectionary	Soft drinks and confectionary (and citrus)	p-menth-1-ene-6,8,9-triol	Urine	UPLC-ESI-QTof	Andersen et al., 2014a
Confectionary/ Sweetened drinks	Sugar sweetened soft drinks /confectionary	Soft drinks and confectionary (and citrus)	pyroglutamyl proline	Urine	UPLC-ESI-QTof	Andersen et al., 2014a
Confectionary/ Sweetened drinks	Sugar sweetened soft drinks /confectionary	sugar-sweetened beverages	citrulline	Urine	NMR	Gibbons et al., 2015
Confectionary/ Sweetened drinks	Sugar sweetened soft drinks /confectionary	sugar-sweetened beverages	formate	Urine	NMR	Gibbons et al., 2015
Confectionary/ Sweetened drinks	Sugar sweetened soft drinks /confectionary	sugar-sweetened beverages	isocitrate	Urine	NMR	Gibbons et al., 2015
Confectionary/ Sweetened drinks	Sugar sweetened soft drinks /confectionary	sugar-sweetened beverages	Taurine	Urine	NMR	Gibbons et al., 2015
Confectionary/ Sweetened drinks	Artificially sweetened drinks	Low- Calorie Sweeteners	sodium cyclamate	Urine	LC-ESI-MS/MS	Logue et al., 2017
Confectionary/ Sweetened drinks	Artificially sweetened drinks	Low- Calorie Sweeteners	sodium saccharin	Urine	LC-ESI-MS/MS	Logue et al., 2017
Confectionary/ Sweetened drinks	Artificially sweetened drinks	Low- Calorie Sweeteners	steviol glucuronide	Urine	LC-ESI-MS/MS	Logue et al., 2017
Confectionary/ Sweetened drinks	Artificially sweetened drinks	Low- Calorie Sweeteners	sucralose	Urine	LC-ESI-MS/MS	Logue et al., 2017
Confectionary/ Sweetened drinks	Artificially sweetened drinks	Low- Calorie Sweeteners	acesulfame-K	Urine	UPLC-QTOF-MS	S C Sri Harsha et al., 2018
Alchoholic Drinks	Wine	Wine	(Epi)catechin glucuronide	Urine	UPLC-MS/MS	Boto-Ordóñez et al., 2013
Alchoholic Drinks	Wine	Wine	(epi)catechin sulfate	Urine	UPLC-MS/MS	Boto-Ordóñez et al., 2013
Alchoholic Drinks	Wine	red wine and grape juice	1,2,3-Trihydroxybenzene	Urine	GC-MS	van Dorsten et al., 2010
Alchoholic Drinks	Wine	wine/grapes	2,3-butanediol	Urine	NMR	Heinzmann,et al., 2012
Alchoholic Drinks	Wine	Wine	2,3-Dihydroxyisovaleric acid	Urine	GC-MS	Playdon et al., 2016
Alchoholic Drinks	Wine	wine/grapes	2-isopropylmalate	Urine	NMR	Heinzmann,et al., 2012
Alchoholic Drinks	Wine	red wine and grape juice	3-(3-Hydroxyphenyl)-3-hydroxypropionic acid	Urine	GC-MS	van Dorsten et al., 2010
Alchoholic Drinks	Wine	red wine and grape juice	3,4-Dihydroxyphenylpropionic acid	Urine	GC-MS	van Dorsten et al., 2010
Alchoholic Drinks	Wine	red wine and grape juice	3-Hydroxyhippuric acid	Urine	GC-MS	van Dorsten et al., 2010
Alchoholic Drinks	Wine	red wine and grape juice	3-Hydroxyphenylacetic acid	Urine	GC-MS	van Dorsten et al., 2010
Alchoholic Drinks	Wine	red wine and grape juice	3-Hydroxyphenylpropionic acid	Urine	GC-MS	van Dorsten et al., 2010
Alchoholic Drinks	Wine	Wine	3-Methyl-2-oxovalerate	Urine	NMR	Vázquez-Fresno et al., 2012
Alchoholic Drinks	Wine	red wine and grape juice	4-Hydroxy-3,5-dimethoxybenzoic acid (syringic acid)	Urine	GC-MS	van Dorsten et al., 2010
Alchoholic Drinks	Wine	red wine and grape juice	4-Hydroxybenzoic acid	Urine	GC-MS	van Dorsten et al., 2010
Alchoholic Drinks	Wine	red wine and grape juice	4-Hydroxyhippuric acid	Urine	GC-MS	van Dorsten et al., 2010
Alchoholic Drinks	Wine	red wine and grape juice	4-Hydroxymandelic acid	Urine	GC-MS	van Dorsten et al., 2010
Alchoholic Drinks	Wine	red wine and grape juice	4-Hydroxyphenylacetic acid	Urine	GC-MS	van Dorsten et al., 2010
Alchoholic Drinks	Wine	Wine	4-O-Methylgallic acid	Urine	LC-MS	Edmands et al., 2015
Alchoholic Drinks	Wine	Wine	caffeic acid	Urine	UPLC-MS/MS	Boto-Ordóñez et al., 2013
Alchoholic Drinks	Wine	Wine	coumaric acid	Urine	UPLC-MS/MS	Boto-Ordóñez et al., 2013
Alchoholic Drinks	Wine	wine/grapes	diethylmalonate	Urine	NMR	Heinzmann,et al., 2012
Alchoholic Drinks	Wine	Wine	dihydrocaffeic acid	Urine	UPLC-MS/MS	Boto-Ordóñez et al., 2013
Alchoholic Drinks	Wine	red wine and grape juice	dihydroferulic acid	Urine	GC-MS	van Dorsten et al., 2010
Alchoholic Drinks	Wine	Wine	Dihydroresveratrol glucuronide	Urine	LC-MS	Edmands et al., 2015
Alchoholic Drinks	Wine	Wine	dihydroxybenzoic acid	Urine	UPLC-MS/MS	Boto-Ordóñez et al., 2013
Alchoholic Drinks	Wine	Wine	dihydroxyphenyl-γ-valerolacton glucuronide	Urine	UPLC-MS/MS	Boto-Ordóñez et al., 2013
Alchoholic Drinks	Wine	Wine	dihydroxyphenyl-γ-valerolacton sulfate	Urine	UPLC-MS/MS	Boto-Ordóñez et al., 2013
Alchoholic Drinks	Wine	Wine	enterolactone	Urine	UPLC-MS/MS	Boto-Ordóñez et al., 2013
Alchoholic Drinks	Wine	wine/grapes	ethanol	Urine	NMR	Heinzmann,et al., 2012
Alchoholic Drinks	Wine	Wine	ethyl glucuronide	Urine	NMR	Vázquez-Fresno et al., 2015
Alchoholic Drinks	Wine	Wine	ethylgallate	Urine	UPLC-MS/MS	Boto-Ordóñez et al., 2013
Alchoholic Drinks	Wine	Wine	ethylgallate glucuronide	Urine	UPLC-MS/MS	Boto-Ordóñez et al., 2013
Alchoholic Drinks	Wine	Wine	ethylgallate sulfate	Urine	UPLC-MS/MS	Boto-Ordóñez et al., 2013
Alchoholic Drinks	Wine	red wine and grape juice	ferulic acid	Urine	GC-MS	van Dorsten et al., 2010
Alchoholic Drinks	Wine	Wine	gallic acid	Urine	UPLC-MS/MS	Boto-Ordóñez et al., 2013
Alchoholic Drinks	Wine	Wine	Gallic acid ethyl ester sulfate	Urine	LC-MS	Edmands et al., 2015
Alchoholic Drinks	Wine	red wine and grape juice	glucose-1-phosphate	Urine	GC-MS and (SPE)-LC-MS/MS	Jacobs et al., 2012
Alchoholic Drinks	Wine	red wine and grape juice	Hippuric acid	Urine	GC-MS	van Dorsten et al., 2010
Alchoholic Drinks	Wine	red wine and grape juice	homovanillic acid	Urine	GC-MS	van Dorsten et al., 2010
Alchoholic Drinks	Wine	Wine	hydroxyphenyl propionic acid	Urine	UPLC-MS/MS	Boto-Ordóñez et al., 2013
Alchoholic Drinks	Wine	Wine	Hydroxytyrosol sulfate	Urine	LC-MS	Edmands et al., 2015
Alchoholic Drinks	Wine	red wine and grape juice	indole-3-lactic acid	Urine	GC-MS and (SPE)-LC-MS/MS	Jacobs et al., 2012
Alchoholic Drinks	Wine	red wine and grape juice	isovanillic acid	Urine	GC-MS	van Dorsten et al., 2010
Alchoholic Drinks	Wine	Wine	Mannitol	Urine	NMR	Vazquez-Fresno et al., 2012
Alchoholic Drinks	Wine	Wine	methoxy-hydroxyphenyl-γ-valerolactone glucuronide	Urine	UPLC-MS/MS	Boto-Ordóñez et al., 2013
Alchoholic Drinks	Wine	Wine	methoxy-hydroxyphenyl-γ-valerolactone sulfate	Urine	UPLC-MS/MS	Boto-Ordóñez et al., 2013
Alchoholic Drinks	Wine	Wine	Methyl-(epi)catechin glucuronide	Urine	UPLC-MS/MS	Boto-Ordóñez et al., 2013
Alchoholic Drinks	Wine	Wine	Methyl-(epi)catechin sulfate	Urine	UPLC-MS/MS	Boto-Ordóñez et al., 2013
Alchoholic Drinks	Wine	Wine	methylgallic acid	Urine	UPLC-MS/MS	Boto-Ordóñez et al., 2013
Alchoholic Drinks	Wine	Wine	methylgallic sulfate	Urine	UPLC-MS/MS	Boto-Ordóñez et al., 2013
Alchoholic Drinks	Wine	red wine and grape juice	nicotinic acid	Urine	GC-MS and (SPE)-LC-MS/MS	Jacobs et al., 2012
Alchoholic Drinks	Wine	Wine	phenylacetic acid	Urine	UPLC-MS/MS	Boto-Ordóñez et al., 2013
Alchoholic Drinks	Wine	red wine and grape juice	Phenylacetylglutamine	Urine	GC-MS	van Dorsten et al., 2010
Alchoholic Drinks	Wine	red wine and grape juice	pyrogallol	Urine	GC-MS and (SPE)-LC-MS/MS	Jacobs et al., 2012
Alchoholic Drinks	Wine	Wine	sinapic acid	Urine	UPLC-MS/MS	Boto-Ordóñez et al., 2013
Alchoholic Drinks	Wine	red wine and grape juice	sucrose	Urine	GC-MS and (SPE)-LC-MS/MS	Jacobs et al., 2012
Alchoholic Drinks	Wine	red wine and grape juice	syringic acid	Urine	GC-MS	Jacobs et al., 2012
Alchoholic Drinks	Wine	Wine	Syringic acid sulfate	Urine	LC-MS	Edmands et al., 2015
Alchoholic Drinks	Wine	wine/grapes	Tartrate	Urine	NMR	Heinzmann,et al., 2012
Alchoholic Drinks	Wine	red wine and grape juice	vanillic acid	Urine	GC-MS	van Dorsten et al., 2010
Alchoholic Drinks	Wine	Wine	vanilloylglycine	Urine	UPLC-MS/MS	Boto-Ordóñez et al., 2013
Alchoholic Drinks	Wine	red wine and grape juice	vanilmandelic acid	Urine	GC-MS	van Dorsten et al., 2010
Alchoholic Drinks	Wine	Wine/red wine	Resveratrol	Urine	LC-MS/MS	Zamora-Ros et al., 2017
Alchoholic Drinks	Beer	Beer	isoxanthohumol	Urine	LC-MS/MS	Quifer-Rada et al., 2014
General Fruit & Vegetables	General Fruit & Vegetables	fruit (apple, orange, grapes and grapefruit)	4-Hydroxyhippuric acid	Urine	NMR	Heinzmann,et al., 2012
General Fruit & Vegetables	General Fruit & Vegetables	Fruit juices	4-Hydroxyproline betaine	Urine	UPLC-MS/MS	Playdon et al., 2016
General Fruit & Vegetables	General Fruit & Vegetables	Fruit and vegetable (F&V) diet	5-Methylcytidine	Urine	LC–MS/MS	May et al., 2013
General Fruit & Vegetables	General Fruit & Vegetables	Fruit and vegetable (F&V) diet	7C-aglycone; enterolactone	Urine	LC–MS/MS	May et al., 2013
General Fruit & Vegetables	General Fruit & Vegetables	Vegetarian diet	actetoacetate	Urine	NMR	O'Sullivan et al., 2011
General Fruit & Vegetables	General Fruit & Vegetables	Fruit and vegetable (F&V) diet	Adenosine	Urine	LC–MS/MS	May et al., 2013
General Fruit & Vegetables	General Fruit & Vegetables	Vegetarian diet	citrate	Urine	NMR	Xu et al., 2010
General Fruit & Vegetables	General Fruit & Vegetables	Fruit and vegetable (F&V) diet	Daidzein	Urine	LC–MS/MS	May et al., 2013
General Fruit & Vegetables	General Fruit & Vegetables	Fruit and vegetable (F&V) diet	Equol	Urine	LC–MS/MS	May et al., 2013
General Fruit & Vegetables	General Fruit & Vegetables	Fruit and vegetable (F&V) diet	Genistein	Urine	LC–MS/MS	May et al., 2013
General Fruit & Vegetables	General Fruit & Vegetables	Vegetarian diet	Glycine	Urine	NMR	Xu et al., 2010
General Fruit & Vegetables	General Fruit & Vegetables	Fruit and vegetable (F&V) diet	Glycitein	Urine	LC–MS/MS	May et al., 2013
General Fruit & Vegetables	General Fruit & Vegetables	Vegetarian diet	Hippuric acid	Urine	NMR	Xu et al., 2010
General Fruit & Vegetables	General Fruit & Vegetables	Fruit and vegetable (F&V) diet	Hydroxyphenylacetyl-glycine	Urine	LC–MS/MS	May et al., 2013
General Fruit & Vegetables	General Fruit & Vegetables	Fruit and vegetable (F&V) diet	Isovalerylglycine; valerylglycine	Urine	LC–MS/MS	May et al., 2013
General Fruit & Vegetables	General Fruit & Vegetables	Vegetarian diet	N-acetyl glycoprotein	Urine	NMR	Xu et al., 2010
General Fruit & Vegetables	General Fruit & Vegetables	Fruit and vegetable (F&V) diet	Nicotinuric acid	Urine	LC–MS/MS	May et al., 2013
General Fruit & Vegetables	General Fruit & Vegetables	Fruit juices	N-Methylglutamic acid	Urine	GC-MS	Playdon et al., 2016
General Fruit & Vegetables	General Fruit & Vegetables	Fruit juices	N-Methylproline	Urine	UPLC-MS/MS	Playdon et al., 2016
General Fruit & Vegetables	General Fruit & Vegetables	Fruit and vegetable (F&V) diet	O-Desmethylangolensin	Urine	LC–MS/MS	May et al., 2013
General Fruit & Vegetables	General Fruit & Vegetables	Vegetarian diet	Phenylacetylglutamine	Urine	NMR	O'Sullivan et al., 2011
General Fruit & Vegetables	General Fruit & Vegetables	fruit (apple, orange, grapes and grapefruit)	proline betaine	Urine	NMR	Heinzmann,et al., 2012
General Fruit & Vegetables	General Fruit & Vegetables	Fruit juices	scyllo-Inositol	Urine	GC-MS	Playdon et al., 2016
General Fruit & Vegetables	General Fruit & Vegetables	Vegetarian diet	Succinate	Urine	NMR	Xu et al., 2010
General Fruit & Vegetables	General Fruit & Vegetables	Fruit and vegetable (F&V) diet	Sulforaphane	Urine	LC–MS/MS	May et al., 2013
General Fruit & Vegetables	General Fruit & Vegetables	fruit (apple, orange, grapes and grapefruit)	Tartrate	Urine	NMR	Heinzmann,et al., 2012
General Fruit & Vegetables	General Fruit & Vegetables	Fruit and vegetable (F&V) diet	Trigonelline	Urine	LC–MS/MS	May et al., 2013
Specific Fruit	Apple	Apple juice	(Epi)catechin	Urine	HPLC–ESI–MS/MS	Kahle et al., 2011
Specific Fruit	Apple	Apple	(Epi)catechin glucuronide	Urine	LC–Orbitrap–MS	Ulaszewskaet al., 2020
Specific Fruit	Apple	Apple	(Epi)catechin methyl sulfate	Urine	LC–Orbitrap–MS	Ulaszewskaet al., 2020
Specific Fruit	Apple	Apple	(epi)catechin-O-sulfate	Urine	LC-MS	Edmands et al., 2015
Specific Fruit	Apple	Apple	2,6‐dimethyl‐2‐(2‐hydroxyethyl)‐3,4‐dihydro‐2H‐1‐benzopyran	Urine	1H‐NMR and LC–MS	McNamara et al., 2020
Specific Fruit	Apple	Apple juice	3,4-Dihydroxybenzoic acid	Urine	HPLC–ESI–MS/MS	Kahle et al., 2011
Specific Fruit	Apple	Apple juice	3,4-Dihydroxyphenylacetic acid	Urine	HPLC–ESI–MS/MS	Kahle et al., 2011
Specific Fruit	Apple	Apple juice	3-Hydroxyhippuric acid	Urine	HPLC–ESI–MS/MS	Kahle et al., 2011
Specific Fruit	Apple	Apple juice	3-Hydroxyphenylacetic acid	Urine	HPLC–ESI–MS/MS	Kahle et al., 2011
Specific Fruit	Apple	Apple juice	3-Hydroxyphenylpropionic acid	Urine	HPLC–ESI–MS/MS	Kahle et al., 2011
Specific Fruit	Apple	Apple juice	4-Hydroxybenzoic acid	Urine	HPLC–ESI–MS/MS	Kahle et al., 2011
Specific Fruit	Apple	Apple juice	4-Hydroxyhippuric acid	Urine	HPLC–ESI–MS/MS	Kahle et al., 2011
Specific Fruit	Apple	Apple juice	4-p-coumaroylquinic acid	Urine	HPLC–ESI–MS/MS	Kahle et al., 2011
Specific Fruit	Apple	Apple juice	5-caffeoylquinic acid	Urine	HPLC–ESI–MS/MS	Kahle et al., 2011
Specific Fruit	Apple	Apple juice	caffeic acid	Urine	HPLC–ESI–MS/MS	Kahle et al., 2011
Specific Fruit	Apple	Apple	Catechin	Urine	LC-MS	Edmands et al., 2015
Specific Fruit	Apple	Apple	Cinnamic acid glycine	Urine	LC–Orbitrap–MS	Ulaszewskaet al., 2020
Specific Fruit	Apple	Apple	Cinnamoyl glycine	Urine	LC–Orbitrap–MS	Ulaszewskaet al., 2020
Specific Fruit	Apple	Apple	Dicarboxylic fatty acid glucuronide C15:1-GLC	Urine	LC–Orbitrap–MS	Ulaszewskaet al., 2020
Specific Fruit	Apple	Apple juice	Dihydrocaffeic acid	Urine	HPLC–ESI–MS/MS	Kahle et al., 2011
Specific Fruit	Apple	Apple	Dihydroxyphenyl propionic acid	Urine	LC–Orbitrap–MS	Ulaszewskaet al., 2020
Specific Fruit	Apple	Apple	Dihydroxyphenyl valeric acid	Urine	LC–Orbitrap–MS	Ulaszewskaet al., 2020
Specific Fruit	Apple	Apple	Dihydroxyphenyl valeric acid glucuronide	Urine	LC–Orbitrap–MS	Ulaszewskaet al., 2020
Specific Fruit	Apple	Apple	Dihydroxyphenyl-_x001F_-valerolactone glucuronide	Urine	LC–Orbitrap–MS	Ulaszewskaet al., 2020
Specific Fruit	Apple	Apple	Dihydroxyphenyl-_x001F_-valerolactone glucuronide sulfate	Urine	LC–Orbitrap–MS	Ulaszewskaet al., 2020
Specific Fruit	Apple	Apple	Dihydroxyphenyl-_x001F_-valerolactone methyl glucuronide	Urine	LC–Orbitrap–MS	Ulaszewskaet al., 2020
Specific Fruit	Apple	Apple	Dihydroxyphenyl-_x001F_-valerolactone sulfate	Urine	LC–Orbitrap–MS	Ulaszewskaet al., 2020
Specific Fruit	Apple	Apple	Dihydroxyphenyl-γ-valerolactone	Urine	LC-MS	Edmands et al., 2015
Specific Fruit	Apple	Apple	dihydroxyphenyl-γ-valerolactone sulfate	Urine	LC-MS	Edmands et al., 2015
Specific Fruit	Apple	Apple	Fatty Acid C10:2	Urine	LC–Orbitrap–MS	Ulaszewskaet al., 2020
Specific Fruit	Apple	Apple	Fatty acid GLC OH-C13:3-GLC	Urine	LC–Orbitrap–MS	Ulaszewskaet al., 2020
Specific Fruit	Apple	Apple	Fatty acid glucuronide C13:2-GLC	Urine	LC–Orbitrap–MS	Ulaszewskaet al., 2020
Specific Fruit	Apple	Apple	Fatty Acid Glucuronide C15:2-GLC	Urine	LC–Orbitrap–MS	Ulaszewskaet al., 2020
Specific Fruit	Apple	Apple juice	Ferulic acid	Urine	HPLC–ESI–MS/MS	Kahle et al., 2011
Specific Fruit	Apple	Apple	Feruloylquinic acid	Urine	LC–Orbitrap–MS	Ulaszewskaet al., 2020
Specific Fruit	Apple	Apple	Glucosyl-phenyl propionic acid	Urine	LC–Orbitrap–MS	Ulaszewskaet al., 2020
Specific Fruit	Apple	Apple juice	Hippuric acid	Urine	HPLC–ESI–MS/MS	Kahle et al., 2011
Specific Fruit	Apple	Apple	Hydroxy fatty acid (OH)C13:2-GLC	Urine	LC–Orbitrap–MS	Ulaszewskaet al., 2020
Specific Fruit	Apple	Apple	Hydroxy fatty acid (OH)C15:4	Urine	LC–Orbitrap–MS	Ulaszewskaet al., 2020
Specific Fruit	Apple	Apple	Hydroxy fatty acid glucuronide (OH)C13:0-GLC	Urine	LC–Orbitrap–MS	Ulaszewskaet al., 2020
Specific Fruit	Apple	Apple	Hydroxy fatty acid glucuronide (OH)C13:1-GLC	Urine	LC–Orbitrap–MS	Ulaszewskaet al., 2020
Specific Fruit	Apple	Apple	Hydroxy fatty acid glucuronide (OH)C13:3-GLC	Urine	LC–Orbitrap–MS	Ulaszewskaet al., 2020
Specific Fruit	Apple	Apple	Hydroxy fatty acid glucuronide (OH)C15:1-GLC	Urine	LC–Orbitrap–MS	Ulaszewskaet al., 2020
Specific Fruit	Apple	Apple	Hydroxy fatty acid glucuronide (OH)C15:3-GLC	Urine	LC–Orbitrap–MS	Ulaszewskaet al., 2020
Specific Fruit	Apple	Apple	Hydroxy(dihydroxy)phenyl valeric acid methylsulfate	Urine	LC–Orbitrap–MS	Ulaszewskaet al., 2020
Specific Fruit	Apple	Apple	Hydroxy(dihydroxy)phenyl valeric acid sulfate	Urine	LC–Orbitrap–MS	Ulaszewskaet al., 2020
Specific Fruit	Apple	Apple	Hydroxy(dihydroxyphenyl) valeric acid glucuronide	Urine	LC–Orbitrap–MS	Ulaszewskaet al., 2020
Specific Fruit	Apple	Apple	Hydroxy(dihydroxyphenyl) valeric acid methylglucuronide	Urine	LC–Orbitrap–MS	Ulaszewskaet al., 2020
Specific Fruit	Apple	Apple	Hydroxybenzoic acid sulfate	Urine	LC–Orbitrap–MS	Ulaszewskaet al., 2020
Specific Fruit	Apple	Apple	Hydroxycinnamic acid	Urine	LC–Orbitrap–MS	Ulaszewskaet al., 2020
Specific Fruit	Apple	Apple	Hydroxy-glutaric acid (position 3-OH)	Urine	LC–Orbitrap–MS	Ulaszewskaet al., 2020
Specific Fruit	Apple	Apple	Hydroxyhippuric acid	Urine	LC–Orbitrap–MS	Ulaszewskaet al., 2020
Specific Fruit	Apple	Apple	Hydroxyhippuric acid sulfate	Urine	LC–Orbitrap–MS	Ulaszewskaet al., 2020
Specific Fruit	Apple	Apple	Hydroxyphenyl valeric acid sulfate	Urine	LC–Orbitrap–MS	Ulaszewskaet al., 2020
Specific Fruit	Apple	Apple	Hydroxyphenyl valeric acid-glucuronide	Urine	LC–Orbitrap–MS	Ulaszewskaet al., 2020
Specific Fruit	Apple	Apple	Hydroxyphenyl--valerolactone glucuronide	Urine	LC–Orbitrap–MS	Ulaszewskaet al., 2020
Specific Fruit	Apple	Apple	Hydroxyphenyl--valerolactone sulfate	Urine	LC–Orbitrap–MS	Ulaszewskaet al., 2020
Specific Fruit	Apple	Apple	Hydroxyphenylacetic acid	Urine	LC–Orbitrap–MS	Ulaszewskaet al., 2020
Specific Fruit	Apple	Apple	Hydroxyphenylacetic acid sulfate	Urine	LC–Orbitrap–MS	Ulaszewskaet al., 2020
Specific Fruit	Apple	Apple	Hydroxyphenylacetylglutamine	Urine	LC–Orbitrap–MS	Ulaszewskaet al., 2020
Specific Fruit	Apple	Apple	Hydroxyphenylacetylglutamine sulfate	Urine	LC–Orbitrap–MS	Ulaszewskaet al., 2020
Specific Fruit	Apple	Apple	Hydroxyphenylpropionic acid sulfate	Urine	LC–Orbitrap–MS	Ulaszewskaet al., 2020
Specific Fruit	Apple	Apple	Indole-acetylaspartic acid	Urine	LC–Orbitrap–MS	Ulaszewskaet al., 2020
Specific Fruit	Apple	Apple	Indolylacryloylglycine	Urine	LC–Orbitrap–MS	Ulaszewskaet al., 2020
Specific Fruit	Apple	Apple juice	Isoferulic acid	Urine	HPLC–ESI–MS/MS	Kahle et al., 2011
Specific Fruit	Apple	Apple	isorhamnetin	Urine	HPLC-ESI-QTrap	Saenger et al., 2017
Specific Fruit	Apple	Apple	kaempferol	Urine	HPLC-ESI-QTrap	Saenger et al., 2017
Specific Fruit	Apple	Apple	Methoxy-benzylalcohol glucuronide	Urine	LC–Orbitrap–MS	Ulaszewskaet al., 2020
Specific Fruit	Apple	Apple	Methyl (epi)catechin	Urine	LC–Orbitrap–MS	Ulaszewskaet al., 2020
Specific Fruit	Apple	Apple	Methylglutaconic acid glucuronide	Urine	LC–Orbitrap–MS	Ulaszewskaet al., 2020
Specific Fruit	Apple	Apple	N-Acetylglutamic acid	Urine	LC–Orbitrap–MS	Ulaszewskaet al., 2020
Specific Fruit	Apple	Apple juice	p-Coumaric acid	Urine	HPLC–ESI–MS/MS	Kahle et al., 2011
Specific Fruit	Apple	Apple	Phloretin	Urine	LC–MS	Krogholm et al., 2010
Specific Fruit	Apple	Apple	Phloretin glucuronide	Urine	LC-MS	Makarova et al., 2014
Specific Fruit	Apple	Apple	Phloretin glucuronide sulfate	Urine	LC–Orbitrap–MS	Ulaszewskaet al., 2020
Specific Fruit	Apple	Apple	procyanidin B2	Urine	LC-MS	Edmands et al., 2015
Specific Fruit	Apple	Apple	procyanidin B5	Urine	LC-MS	Edmands et al., 2015
Specific Fruit	Apple	Apple juice	quercetin	Urine	HPLC–ESI–MS/MS	Kahle et al., 2011
Specific Fruit	Apple	Apple	quercetin 3-O-arabinoside	Urine	HPLC-ESI-QTrap	Saenger et al., 2017
Specific Fruit	Apple	Apple	quercetin 3-O-galactoside	Urine	HPLC-ESI-QTrap	Saenger et al., 2017
Specific Fruit	Apple	Apple	quercetin 3-O-glucoside	Urine	HPLC-ESI-QTrap	Saenger et al., 2017
Specific Fruit	Apple	Apple	quercetin 3-O-rhamnoside	Urine	HPLC-ESI-QTrap	Saenger et al., 2017
Specific Fruit	Apple	Apple	quercetin 3-O-xyloside	Urine	HPLC-ESI-QTrap	Saenger et al., 2017
Specific Fruit	Apple	Apple	Quercetin,	Urine	HPLC-ESI-QTrap	Saenger et al., 2017
Specific Fruit	Apple	Apple	rhamnitol	Urine	NMR and LC-NMR-MS	Posma et al., 2017
Specific Fruit	Apple	Apple	xylose	Urine	1H‐NMR and LC–MS	McNamara et al., 2020
Specific Fruit	Pear	Pear and Apple	Phloretin glucuronide	Urine	HPLC-TOF-MS	Edmands et al., 2015
Specific Fruit	Banana	Banana	6-hydroxy-1-methyl-1,2,3,4-tetrahydro-β-carboline sulfate	Urine	UPLC-QTOF-MS and GC × GC-MS	Vazquez Manjarrez et al., 2019
Specific Fruit	Banana	Banana	dopamine sulfate	Urine	UPLC-QTOF-MS and GC × GC-MS	Vazquez Manjarrez et al., 2019
Specific Fruit	Banana	Banana	methoxyeugenol glucuronide (MEUG-GLUC)	Urine	UPLC-QTOF-MS and GC × GC-MS	Vazquez Manjarrez et al., 2019
Specific Fruit	Banana	Banana	salsolinol sulfate	Urine	UPLC-QTOF-MS and GC × GC-MS	Vazquez Manjarrez et al., 2019
Specific Fruit	Banana	Banana	xanthurenic acid	Urine	UPLC-QTOF-MS and GC × GC-MS	Vazquez Manjarrez et al., 2019
Specific Fruit	Grape	Grape Juice	(Epi)catechin glucuronide	Urine	HPLC-PDA-ESI-MSn	Stalmach et al., 2011
Specific Fruit	Grape	Grape Juice	(Epi)catechin sulfate	Urine	HPLC-PDA-ESI-MSn	Stalmach et al., 2011
Specific Fruit	Grape	grapes/wine	2,3-butanediol	Urine	NMR	Heinzmann,et al., 2012
Specific Fruit	Grape	grapes/wine	2-isopropylmalate	Urine	NMR	Heinzmann,et al., 2012
Specific Fruit	Grape	Grape skin	4-Hydroxy-5-(dihydroxyphenyl)- valeric acid glucuronide	Urine	HPLC-qTOF-MS	Khymenets et al., 2015
Specific Fruit	Grape	Grape skin	4-Hydroxy-5-(dihydroxyphenyl)-valeric acid sulphate	Urine	HPLC-qTOF-MS	Khymenets et al., 2015
Specific Fruit	Grape	Grape skin	4-Hydroxyhippuric acid	Urine	HPLC-qTOF-MS	Khymenets et al., 2015
Specific Fruit	Grape	Grape skin	5-(Dihydroxyphenyl)-γ-valerolactone glucuronide	Urine	HPLC-qTOF-MS	Khymenets et al., 2015
Specific Fruit	Grape	Grape skin	5-(Hydroxy-methoxy-phenyl)-γ-valerolactone glucuronide	Urine	HPLC-qTOF-MS	Khymenets et al., 2015
Specific Fruit	Grape	Grape skin	5-(Hydroxyphenyl)-γ-valerolactone glucuronide	Urine	HPLC-qTOF-MS	Khymenets et al., 2015
Specific Fruit	Grape	Grape Juice	Coumaric acid-O-sulfate	Urine	HPLC-PDA-ESI-MSn	Stalmach et al., 2011
Specific Fruit	Grape	Grape Juice	Cyanidin-3-O-glucoside	Urine	HPLC-PDA-ESI-MSn	Stalmach et al., 2011
Specific Fruit	Grape	grapes/wine	diethylmalonate	Urine	NMR	Heinzmann,et al., 2012
Specific Fruit	Grape	Grape Juice	Dihydrocaffeic acid	Urine	HPLC-PDA-ESI-MSn	Stalmach et al., 2011
Specific Fruit	Grape	Grape Juice	dihydroferulic acid	Urine	HPLC-PDA-ESI-MSn	Stalmach et al., 2011
Specific Fruit	Grape	Grape skin	Dihydrosinapic acid glucuronide	Urine	HPLC-qTOF-MS	Khymenets et al., 2015
Specific Fruit	Grape	grapes/wine	ethanol	Urine	NMR	Heinzmann,et al., 2012
Specific Fruit	Grape	Grape Juice	Feruloylglycine	Urine	HPLC-PDA-ESI-MSn	Stalmach et al., 2011
Specific Fruit	Grape	Grape skin	Hydroxy-dimethoxybenzoic acid glucuronide	Urine	HPLC-qTOF-MS	Khymenets et al., 2015
Specific Fruit	Grape	Grape Juice	Isoferulic acid-3'-O-glucuronide	Urine	HPLC-PDA-ESI-MSn	Stalmach et al., 2011
Specific Fruit	Grape	Grape Juice	Isoferulic acid-3'-O-sulfate	Urine	HPLC-PDA-ESI-MSn	Stalmach et al., 2011
Specific Fruit	Grape	Grape Juice	Malvidin-3-O-glucoside	Urine	HPLC-PDA-ESI-MSn	Stalmach et al., 2011
Specific Fruit	Grape	Grape Juice	Myricetin-O-glycoside-O-sulfate	Urine	HPLC-PDA-ESI-MSn	Stalmach et al., 2011
Specific Fruit	Grape	Grape Juice	O-Methyl-(epi)catechin-O-glucuronide	Urine	HPLC-PDA-ESI-MSn	Stalmach et al., 2011
Specific Fruit	Grape	Grape Juice	O-Methyl-(epi)gallocatechin-O-sulfate	Urine	HPLC-PDA-ESI-MSn	Stalmach et al., 2011
Specific Fruit	Grape	Grape Juice	Peonidin-3-O-glucoside	Urine	HPLC-PDA-ESI-MSn	Stalmach et al., 2011
Specific Fruit	Grape	Grapes	Tartaric acid	Urine	NMR	Garcia-Perez et al., 2016
Specific Fruit	Grape	grapes/wine	Tartrate	Urine	NMR	Heinzmann,et al., 2012
Specific Fruit	Grape	Grape skin	Tyrosine	Urine	HPLC-qTOF-MS	Khymenets et al., 2015
Specific Fruit	Grape	Grape skin	Vanillic acid glucuronide	Urine	HPLC-qTOF-MS	Khymenets et al., 2015
Specific Fruit	Grape	Grape skin	Vanilloylglycine	Urine	HPLC-qTOF-MS	Khymenets et al., 2015
Specific Fruit	Strawberries/red berries	Strawberry	2,5-Dimethyl-4-methoxy-3(2H)-furanone sulphate	Urine	UPLC-ESI-QTof	Andersen et al., 2014b
Specific Fruit	Strawberries/red berries	Raspberry	3-Hydroxyhippuric acid	Urine	FT-ICR-MS and FIE-MSn	Lloyd et al., 2011
Specific Fruit	Strawberries/red berries	Strawberry	4-hydroxyhippuric acid,	Urine	LC(ESI)-QTOF-MS	Cuparencu et al., 2016
Specific Fruit	Strawberries/red berries	Raspberry	Ascorbate	Urine	FT-ICR-MS and FIE-MSn	Lloyd et al., 2011
Specific Fruit	Strawberries/red berries	Raspberry	Caffeoyl sulfate	Urine	FT-ICR-MS and FIE-MSn	Lloyd et al., 2011
Specific Fruit	Strawberries/red berries	Strawberry	Dihydrokaempferol glucuronide	Urine	LC(ESI)-QTOF-MS	Cuparencu et al., 2016
Specific Fruit	Strawberries/red berries	Raspberry	ellagic acid	Urine	HPLC-PDA-MS	González-Barrio et al., 2010
Specific Fruit	Strawberries/red berries	Raspberry	ellagic acid-O-glucuronide	Urine	HPLC-PDA-MS	González-Barrio et al., 2010
Specific Fruit	Strawberries/red berries	Strawberry	Furaneol glucuronide	Urine	LC(ESI)-QTOF-MS	Cuparencu et al., 2016
Specific Fruit	Strawberries/red berries	Strawberry	Furaneol sulphate	Urine	LC(ESI)-QTOF-MS	Cuparencu et al., 2016
Specific Fruit	Strawberries/red berries	Strawberry	Leucopelargonidin sulphate	Urine	LC(ESI)-QTOF-MS	Cuparencu et al., 2016
Specific Fruit	Strawberries/red berries	Strawberry	Mesifurane sulphate	Urine	LC(ESI)-QTOF-MS	Cuparencu et al., 2016
Specific Fruit	Strawberries/red berries	Raspberry	Methyl-(epi)catechin sulfate	Urine	FT-ICR-MS and FIE-MSn	Lloyd et al., 2011
Specific Fruit	Strawberries/red berries	Raspberry	Naringenin glucuronide	Urine	FT-ICR-MS and FIE-MSn	Lloyd et al., 2011
Specific Fruit	Strawberries/red berries	Strawberry	p-coumaric acid sulphate	Urine	LC(ESI)-QTOF-MS	Cuparencu et al., 2016
Specific Fruit	Strawberries/red berries	Strawberry	Pelargonidin glucuronide	Urine	LC(ESI)-QTOF-MS	Cuparencu et al., 2016
Specific Fruit	Strawberries/red berries	Raspberry	urolithin A-O-glucuronide	Urine	HPLC-PDA-MS	González-Barrio et al., 2010
Specific Fruit	Strawberries/red berries	Raspberry	urolithin B-O-glucuronide	Urine	HPLC-PDA-MS	González-Barrio et al., 2010
Specific Fruit	Tomato	Tomato (juice)	Hydroxyesculeogenin B isomer	Urine	LC-HRMS	Hövelmann, et al., 2020
Specific Fruit	Tomato	Tomato (juice)	Esculeogenin B sulfonate	Urine	LC-HRMS	Hövelmann, et al., 2020
Specific Fruit	Tomato	Tomato (juice)	Esculeogenin B isomer	Urine	LC-HRMS	Hövelmann, et al., 2020
Specific Fruit	Tomato	Tomato (juice)	Tomatidine	Urine	LC-HRMS	Hövelmann, et al., 2020
Specific Fruit	Tomato	Tomato (juice)	Tangutorid E glucuronide	Urine	LC-HRMS	Hövelmann, et al., 2020
Specific Fruit	Tomato	Tomato (juice)	Tangutorid F glucuronide	Urine	LC-HRMS	Hövelmann, et al., 2020
Specific Vegetables	Cruciferous vegetables	Cruciferous vegetables	3,3′-diindolylmethane	Urine	LC-ESI-MS/MS	Fujioka et al., 2014
Specific Vegetables	Cruciferous vegetables	Cruciferous vegetables	3-Hydroxy-3-(methyl-sulphinyl)propanoic acid	Urine	UPLC-ESI-QTof	Andersen et al., 2014b
Specific Vegetables	Cruciferous vegetables	Cruciferous vegetables	3-Hydroxy-hippuric acid	Urine	UPLC-ESI-QTof	Andersen et al., 2014b
Specific Vegetables	Cruciferous vegetables	Cruciferous vegetables	3-Hydroxy-hippuric acid sulphate	Urine	UPLC-ESI-QTof	Andersen et al., 2014b
Specific Vegetables	Cruciferous vegetables	Broccoli	Ascorbate	Urine	FT-ICR-MS and FIE-MSn	Lloyd et al., 2011
Specific Vegetables	Cruciferous vegetables	Broccoli	Erucin N-acetyl-cysteine	Urine	HPLC-MS	Saha et al., 2012
Specific Vegetables	Cruciferous vegetables	Broccoli	Hesperitin glucuronide	Urine	FT-ICR-MS and FIE-MSn	Lloyd et al., 2011
Specific Vegetables	Cruciferous vegetables	Cruciferous vegetables	Iberin N-acetyl-cysteine	Urine	UPLC-ESI-QTof	Andersen et al., 2014b
Specific Vegetables	Cruciferous vegetables	Broccoli	L-Xylonate/L-lyxonate	Urine	FT-ICR-MS and FIE-MSn	Lloyd et al., 2011
Specific Vegetables	Cruciferous vegetables	Cruciferous vegetables	N-Acetyl-S-(N-3-methylthiopropyl)cysteine	Urine	UPLC-ESI-QTof	Andersen et al., 2014b
Specific Vegetables	Cruciferous vegetables	Cruciferous vegetables	N-Acetyl-S-(N-allylthiocarbamoyl)cysteine	Urine	UPLC-qTOF-MS	Andersen et al., 2013
Specific Vegetables	Cruciferous vegetables	Broccoli	Naringenin glucuronide	Urine	FT-ICR-MS and FIE-MSn	Lloyd et al., 2011
Specific Vegetables	Cruciferous vegetables	Cruciferous vegetables	S-methyl-L-cysteine sulfoxide	Urine	NMR	Edmands et al., 2011
Specific Vegetables	Cruciferous vegetables	Broccoli	Sulforaphane N-acetyl-cysteine	Urine	LC-MS/MS	Saha et al., 2012
Specific Vegetables	Cruciferous vegetables	Broccoli	Sulforaphane N-cysteine	Urine	LC-MS/MS	Hauder et al., 2011
Specific Vegetables	Cruciferous vegetables	Broccoli	Tetronic acid derivative	Urine	FT-ICR-MS and FIE-MSn	Lloyd et al., 2011
Specific Vegetables	Cruciferous vegetables	Broccoli	Tetronic acids	Urine	FT-ICR-MS and FIE-MSn	Lloyd et al., 2011
Specific Vegetables	Cruciferous vegetables	Broccoli	Threitol/erythritol	Urine	FT-ICR-MS and FIE-MSn	Lloyd et al., 2011
Specific Vegetable Group Biomarkers	Onion/Garlic	Onion	Alliin with a C3H4O2 modification [C9H15NO5S]	Urine	UPLC-Q-TOF MS	Lynn et al., 2019
Specific Vegetable Group Biomarkers	Onion/Garlic	Garlic	Allyl methyl sulfide (AMS)	Urine	HR-GC-MS and HRGC-GC-MS/O	Scheffler et al., 2016
Specific Vegetable Group Biomarkers	Onion/Garlic	Garlic	Allyl methyl sulfone (AMSO2)	Urine	HR-GC-MS and HRGC-GC-MS/O	Scheffler et al., 2016
Specific Vegetable Group Biomarkers	Onion/Garlic	Garlic	Allyl methyl sulfoxide (AMSO)	Urine	HR-GC-MS and HRGC-GC-MS/O	Scheffler et al., 2016
Specific Vegetable Group Biomarkers	Onion/Garlic	Garlic	hexahydrohippuric acid	Urine	GC-MS	Praticò et al., 2018 (Jandke and Spiteller, 1987)
Specific Vegetable Group Biomarkers	Onion/Garlic	Onion	Isorhamnetin	Urine	LC-MS	Shi et al., 2015
Specific Vegetable Group Biomarkers	Onion/Garlic	Garlic	N-acetyl-S- (2-carboxypropyl) cysteine (CPMA)	Urine	GC-MS	Praticò et al., 2018 (Jandke and Spiteller, 1987)
Specific Vegetable Group Biomarkers	Onion/Garlic	Onion	N-acetyl-S-(1Z)-propenylcysteine-sulfoxide	Urine	NMR and LC-NMR-MS	Posma et al., 2017
Specific Vegetable Group Biomarkers	Onion/Garlic	Onion	N-acetyl-S-(1Z)-propenyl-cysteine-sulfoxide (NAcSPCSO) [C8H13O4NS]	Urine	UPLC-Q-TOF MS	Lynn et al., 2019
Specific Vegetable Group Biomarkers	Onion/Garlic	Garlic	N-acetyl-S-allylcysteine	Urine	GC-MS	Praticò et al., 2018 (Jandke and Spiteller, 1987)
Specific Vegetable Group Biomarkers	Onion/Garlic	Onion	Quercetin	Urine	LC-MS	Shi et al., 2015
Specific Vegetable Group Biomarkers	Onion/Garlic	Onion	S-(3-methyl-2-butenyl) ethanethioate with a carnitine modification [C14H27NO4S]	Urine	UPLC-Q-TOF MS	Lynn et al., 2019
Specific Vegetable Group Biomarkers	Onion/Garlic	Garlic	S-allylmercapturic acid (ALMA)	Urine	GC-MS	Praticò et al., 2018 (Jandke and Spiteller, 1987)
Specific Vegetable Group Biomarkers	Onion/Garlic	Onion	Tamarixetin	Urine	LC-MS	Shi et al., 2015
Starchy Foods/Vegetable protein	Legumes (peas, beans, peanuts)	White beans	2-Hydroxyhippuric acid	Urine	LC-HR-MS	Garcia-Aloy et al., 2020
Starchy Foods/Vegetable protein	Legumes (peas, beans, peanuts)	Pea	2-Isopropylmalic acid	Urine	UPLC-QTOF-MS	S C Sri Harsha et al., 2018
Starchy Foods/Vegetable protein	Legumes (peas, beans, peanuts)	Lentils	4-Hydroxy-5-(dihydroxyphenyl)-valeric acid-O-sulfate	Urine	LC-HR-MS	Garcia-Aloy et al., 2020
Starchy Foods/Vegetable protein	Legumes (peas, beans, peanuts)	Lentils	5-(3',4'-Dihydroxyphenyl)-y-valerolactone-3-Osulfate	Urine	LC-HR-MS	Garcia-Aloy et al., 2020
Starchy Foods/Vegetable protein	Legumes (peas, beans, peanuts)	Lentils	5-(3',4'-Dihydroxyphenyl)-yvalerolactone-Oglucuronide	Urine	LC-HR-MS	Garcia-Aloy et al., 2020
Starchy Foods/Vegetable protein	Legumes (peas, beans, peanuts)	Lentils	5-(3',5'-Dihydroxyphenyl)-yvalerolactone-methylglucuronide	Urine	LC-HR-MS	Garcia-Aloy et al., 2020
Starchy Foods/Vegetable protein	Legumes (peas, beans, peanuts)	Lentils, White beans, Chickpeas	Aminosalicyluric acid	Urine	LC-HR-MS	Garcia-Aloy et al., 2020
Starchy Foods/Vegetable protein	Legumes (peas, beans, peanuts)	Chickpeas	Ascorbic acid	Urine	LC-HR-MS	Garcia-Aloy et al., 2020
Starchy Foods/Vegetable protein	Legumes (peas, beans, peanuts)	Lentils, Chickpeas	Asp-(i)Leu-Pro / (i)Leu-Asp-Pro	Urine	LC-HR-MS	Garcia-Aloy et al., 2020
Starchy Foods/Vegetable protein	Legumes (peas, beans, peanuts)	Lentils, White beans, Chickpeas	Asp-Ala	Urine	LC-HR-MS	Garcia-Aloy et al., 2020
Starchy Foods/Vegetable protein	Legumes (peas, beans, peanuts)	Chickpeas	Asp-Ala-(i)Leu / Ala-Asp-(i)Leu	Urine	LC-HR-MS	Garcia-Aloy et al., 2020
Starchy Foods/Vegetable protein	Legumes (peas, beans, peanuts)	Pea	asparaginyl valine	Urine	UPLC-QTOF-MS	S C Sri Harsha et al., 2018
Starchy Foods/Vegetable protein	Legumes (peas, beans, peanuts)	Lentils, White beans, Chickpeas	Asp-Asn-Val / Asn-Asp-Val	Urine	LC-HR-MS	Garcia-Aloy et al., 2020
Starchy Foods/Vegetable protein	Legumes (peas, beans, peanuts)	Lentils, White beans, Chickpeas	Asp-Gly / Gly-Asp	Urine	LC-HR-MS	Garcia-Aloy et al., 2020
Starchy Foods/Vegetable protein	Legumes (peas, beans, peanuts)	Lentils, White beans, Chickpeas	Asp-Gly-(i)Leu	Urine	LC-HR-MS	Garcia-Aloy et al., 2020
Starchy Foods/Vegetable protein	Legumes (peas, beans, peanuts)	Lentils, Chickpeas	Asp-Gly-Tyr / Gly-Asp-Tyr	Urine	LC-HR-MS	Garcia-Aloy et al., 2020
Starchy Foods/Vegetable protein	Legumes (peas, beans, peanuts)	Lentils, Chickpeas	Asp-Gly-Val	Urine	LC-HR-MS	Garcia-Aloy et al., 2020
Starchy Foods/Vegetable protein	Legumes (peas, beans, peanuts)	Lentils, White beans, Chickpeas	Asp-Leu	Urine	LC-HR-MS	Garcia-Aloy et al., 2020
Starchy Foods/Vegetable protein	Legumes (peas, beans, peanuts)	Chickpeas	Asp-Met	Urine	LC-HR-MS	Garcia-Aloy et al., 2020
Starchy Foods/Vegetable protein	Legumes (peas, beans, peanuts)	Lentils, White beans, Chickpeas	Asp-Phe	Urine	LC-HR-MS	Garcia-Aloy et al., 2020
Starchy Foods/Vegetable protein	Legumes (peas, beans, peanuts)	Lentils, White beans, Chickpeas	Asp-Ser / Ser-Asp	Urine	LC-HR-MS	Garcia-Aloy et al., 2020
Starchy Foods/Vegetable protein	Legumes (peas, beans, peanuts)	Lentils, Chickpeas	Asp-Thr-Pro / Thr-Asp-Pro	Urine	LC-HR-MS	Garcia-Aloy et al., 2020
Starchy Foods/Vegetable protein	Legumes (peas, beans, peanuts)	Lentils, White beans, Chickpeas	Asp-Tyr	Urine	LC-HR-MS	Garcia-Aloy et al., 2020
Starchy Foods/Vegetable protein	Legumes (peas, beans, peanuts)	Lentils, White beans, Chickpeas	Asp-Val	Urine	LC-HR-MS	Garcia-Aloy et al., 2020
Starchy Foods/Vegetable protein	Legumes (peas, beans, peanuts)	Chickpeas	Cyclo((i)Leu-Phe)	Urine	LC-HR-MS	Garcia-Aloy et al., 2020
Starchy Foods/Vegetable protein	Legumes (peas, beans, peanuts)	Lentils, White beans, Chickpeas	Cyclo(His-Pro)	Urine	LC-HR-MS	Garcia-Aloy et al., 2020
Starchy Foods/Vegetable protein	Legumes (peas, beans, peanuts)	Pulse	dimethylamine	Urine	NMR	Madrid-Gambin et al., 2017
Starchy Foods/Vegetable protein	Legumes (peas, beans, peanuts)	Pulse	dimethylglycine	Urine	NMR	Madrid-Gambin et al., 2017
Starchy Foods/Vegetable protein	Legumes (peas, beans, peanuts)	Lentils	Dopamine sulfate	Urine	LC-HR-MS	Garcia-Aloy et al., 2020
Starchy Foods/Vegetable protein	Legumes (peas, beans, peanuts)	Lentils	Epicatechin sulfate	Urine	LC-HR-MS	Garcia-Aloy et al., 2020
Starchy Foods/Vegetable protein	Legumes (peas, beans, peanuts)	Lentils, White beans	Glycine derivative (C9H17N3O4)	Urine	LC-HR-MS	Garcia-Aloy et al., 2020
Starchy Foods/Vegetable protein	Legumes (peas, beans, peanuts)	Lentils	Hydroxyarginine	Urine	LC-HR-MS	Garcia-Aloy et al., 2020
Starchy Foods/Vegetable protein	Legumes (peas, beans, peanuts)	White beans	Hydroxydihydrojasmonic acid	Urine	LC-HR-MS	Garcia-Aloy et al., 2020
Starchy Foods/Vegetable protein	Legumes (peas, beans, peanuts)	White beans	Hydroxyjasmonic acid	Urine	LC-HR-MS	Garcia-Aloy et al., 2020
Starchy Foods/Vegetable protein	Legumes (peas, beans, peanuts)	Lentils, Chickpeas	Hypaphorine	Urine	LC-HR-MS	Garcia-Aloy et al., 2020
Starchy Foods/Vegetable protein	Legumes (peas, beans, peanuts)	Lentils, White beans, Chickpeas	Leucine derivative (C12H20N2O6)	Urine	LC-HR-MS	Garcia-Aloy et al., 2020
Starchy Foods/Vegetable protein	Legumes (peas, beans, peanuts)	Lentils, White beans, Chickpeas	Muconic acid	Urine	LC-HR-MS	Garcia-Aloy et al., 2020
Starchy Foods/Vegetable protein	Legumes (peas, beans, peanuts)	Pea	N-carbamoyl-2-amino-2-(4-hydroxyphenyl) acetic acid	Urine	UPLC-QTOF-MS	S C Sri Harsha et al., 2018
Starchy Foods/Vegetable protein	Legumes (peas, beans, peanuts)	Pea	N-methyl nicotinic acid	Urine	NMR and LC-NMR-MS	Posma et al., 2017
Starchy Foods/Vegetable protein	Legumes (peas, beans, peanuts)	Lentils	Oxoarginine	Urine	LC-HR-MS	Garcia-Aloy et al., 2020
Starchy Foods/Vegetable protein	Legumes (peas, beans, peanuts)	White beans, Chickpeas	Phenylalanine derivative (C21H25N3O5)	Urine	LC-HR-MS	Garcia-Aloy et al., 2020
Starchy Foods/Vegetable protein	Legumes (peas, beans, peanuts)	Lentils, White beans, Chickpeas	Phloroglucinol glucuronide	Urine	LC-HR-MS	Garcia-Aloy et al., 2020
Starchy Foods/Vegetable protein	Legumes (peas, beans, peanuts)	Lentils, White beans, Chickpeas	Phloroglucinol sulfate	Urine	LC-HR-MS	Garcia-Aloy et al., 2020
Starchy Foods/Vegetable protein	Legumes (peas, beans, peanuts)	Lentils, White beans, Chickpeas	Pro-HPro-Gly / HPro-Pro-Gly	Urine	LC-HR-MS	Garcia-Aloy et al., 2020
Starchy Foods/Vegetable protein	Legumes (peas, beans, peanuts)	Lentils, White beans, Chickpeas	Proline derivative (C10H16N2O4)	Urine	LC-HR-MS	Garcia-Aloy et al., 2020
Starchy Foods/Vegetable protein	Legumes (peas, beans, peanuts)	Lentils, Chickpeas	Protocatechuic acid glucoside	Urine	LC-HR-MS	Garcia-Aloy et al., 2020
Starchy Foods/Vegetable protein	Legumes (peas, beans, peanuts)	Lentils, White beans, Chickpeas	Trigonelline	Urine	LC-HR-MS	Garcia-Aloy et al., 2020
Starchy Foods/Vegetable protein	Legumes (peas, beans, peanuts)	Lentils	Vanillic acid sulfate	Urine	LC-HR-MS	Garcia-Aloy et al., 2020
Starchy Foods/Vegetable protein	Legumes (peas, beans, peanuts)	Lentils, White beans, Chickpeas	y-CEHC glucose	Urine	LC-HR-MS	Garcia-Aloy et al., 2020
Starchy Foods/Vegetable protein	Legumes (peas, beans, peanuts)	Lentils, White beans, Chickpeas	y-CEHC glucuronide	Urine	LC-HR-MS	Garcia-Aloy et al., 2020
Starchy Foods/Vegetable protein	Soy products	Soy-based foods	Daidzein	Urine	GC-MS and 1H NMR	Münger et al., 2017
Starchy Foods/Vegetable protein	Soy products	Soy-based foods	Dihydrogenistein	Urine	LC-MS	Franke et al., 2010
Starchy Foods/Vegetable protein	Soy products	Soy-based foods	Dihydrodaidzein	Urine	LC-MS	Franke et al., 2010
Starchy Foods/Vegetable protein	Soy products	Soy-based foods	Equol	Urine	LC-MS	Franke et al., 2010
Starchy Foods/Vegetable protein	Soy products	Soy-based foods	Genistein	Urine	LC-MS	Franke et al., 2010
Starchy Foods/Vegetable protein	Nuts	Nuts-Almonds	(Epi)catechin sulfate	Urine	LC-q-TOF MS	Llorach et al., 2010a
Starchy Foods/Vegetable protein	Nuts	Nuts	1,3-dihydroxyphenyl-2-O sulfate	Urine	LC-Q-Tof, LTQ-Orbitrap	Tulipani et al., 2011
Starchy Foods/Vegetable protein	Nuts	Nuts- walnut	10-hydroxy-decene-4,6-diynoic acid sulfate	Urine	HPLC-q-ToF-MS	Garcia-Aloy et al., 2014
Starchy Foods/Vegetable protein	Nuts	Nuts	10-hydroxy-decene-4,6-diynoic acid sulfate	Urine	LC-Q-Tof, LTQ-Orbitrap	Tulipani et al., 2011
Starchy Foods/Vegetable protein	Nuts	Nuts-Almonds	2-(Dihydroxyphenyl)-acetic acid glucuronide	Urine	LC-q-TOF MS	Llorach et al., 2010a
Starchy Foods/Vegetable protein	Nuts	Nuts-Almonds	2-(Dihydroxyphenyl)-acetic acid sulfate	Urine	LC-q-TOF MS	Llorach et al., 2010a
Starchy Foods/Vegetable protein	Nuts	Nuts-Almonds	2-(Dihydroxyphenyl)-acetic acid sulfate glucuronide	Urine	LC-q-TOF MS	Llorach et al., 2010a
Starchy Foods/Vegetable protein	Nuts	Nuts-Almonds	2-(Hydroxy-methoxy-phenyl)-acetic acid glucuronide	Urine	LC-q-TOF MS	Llorach et al., 2010a
Starchy Foods/Vegetable protein	Nuts	Nuts-Almonds	2-(Hydroxyphenyl)-acetic acid sulfate	Urine	LC-q-TOF MS	Llorach et al., 2010a
Starchy Foods/Vegetable protein	Nuts	Nuts-Almonds	3-(Dihydroxyphenyl)-propionic acid sulfate	Urine	LC-q-TOF MS	Llorach et al., 2010a
Starchy Foods/Vegetable protein	Nuts	Nuts-Almonds	3-(Hydroxyphenyl)-propionic acid glucuronide	Urine	LC-q-TOF MS	Llorach et al., 2010a
Starchy Foods/Vegetable protein	Nuts	Nuts- walnut	3-indolecarboxylic acid glucuronide	Urine	HPLC-q-ToF-MS	Garcia-Aloy et al., 2014
Starchy Foods/Vegetable protein	Nuts	Nuts-Almonds	4-Hydroxy-5-(dihydroxyphenyl)-valeric acid glucuronide	Urine	LC-q-TOF MS	Llorach et al., 2010a
Starchy Foods/Vegetable protein	Nuts	Nuts-Almonds	4-Hydroxy-5-(dihydroxyphenyl)-valeric acid glucuronide	Urine	LC-q-TOF MS	Llorach et al., 2010a
Starchy Foods/Vegetable protein	Nuts	Nuts-Almonds	4-Hydroxy-5-(dihydroxyphenyl)-valeric acid sulfate	Urine	LC-q-TOF MS	Llorach et al., 2010a
Starchy Foods/Vegetable protein	Nuts	Nuts-Almonds	4-Hydroxy-5-(hydroxy-methoxy-phenyl)-valeric acid glucuronide	Urine	LC-q-TOF MS	Llorach et al., 2010a
Starchy Foods/Vegetable protein	Nuts	Nuts-Almonds	4-Hydroxy-5-(hydroxyphenyl)-valeric acid glucuronide	Urine	LC-q-TOF MS	Llorach et al., 2010a
Starchy Foods/Vegetable protein	Nuts	Nuts-Almonds	4-Hydroxy-5-(hydroxyphenyl)-valeric acid sulfate	Urine	LC-q-TOF MS	Llorach et al., 2010a
Starchy Foods/Vegetable protein	Nuts	Nuts-Almonds	4-Hydroxy-5-(methoxyphenyl)-valeric acid glucuronide	Urine	LC-q-TOF MS	Llorach et al., 2010a
Starchy Foods/Vegetable protein	Nuts	Nuts-Almonds	4-Hydroxy-5-(phenyl)-valeric acid sulfate	Urine	LC-q-TOF MS	Llorach et al., 2010a
Starchy Foods/Vegetable protein	Nuts	Nuts	4-Vinylphenol sulfate	Urine	UPLC-MS/MS	Playdon et al., 2016
Starchy Foods/Vegetable protein	Nuts	Nuts-Almonds	5-(Dihydroxyphenyl)-γ-valerolactone glucuronide	Urine	LC-ESI-MS/MS	Bartolomé et al., 2010
Starchy Foods/Vegetable protein	Nuts	Nuts-Almonds	5-(Dihydroxyphenyl)-γ-valerolactone sulfate	Urine	LC-q-TOF MS	Llorach et al., 2010a
Starchy Foods/Vegetable protein	Nuts	Nuts-Almonds	5-(Dihydroxyphenyl)-γ-valerolactone sulfate glucuronide	Urine	LC-q-TOF MS	Llorach et al., 2010a
Starchy Foods/Vegetable protein	Nuts	Nuts-Almonds	5-(Hydroxy-methoxy-phenyl)-γ-valerolactone glucuronide	Urine	LC-ESI-MS/MS	Bartolomé et al., 2010
Starchy Foods/Vegetable protein	Nuts	Nuts-Almonds	5-(Hydroxy-methoxy-phenyl)-γ-valerolactone sulfate	Urine	LC-ESI-MS/MS	Bartolomé et al., 2010
Starchy Foods/Vegetable protein	Nuts	Nuts-Almonds	5-(Hydroxyphenyl)-γ-valerolactone glucuronide	Urine	LC-q-TOF MS	Llorach et al., 2010a
Starchy Foods/Vegetable protein	Nuts	Nuts-Almonds	5-(Hydroxyphenyl)-γ-valerolactone sulfate	Urine	LC-q-TOF MS	Llorach et al., 2010a
Starchy Foods/Vegetable protein	Nuts	Nuts-Almonds	5-(Trihydroxyphenyl)-γ-valerolactone glucuronide	Urine	LC-q-TOF MS	Llorach et al., 2010a
Starchy Foods/Vegetable protein	Nuts	Nuts- walnut	5-Hydroxyindole-3-acetic acid	Urine	UPLC-ESI-QTof	Andersen et al., 2014b
Starchy Foods/Vegetable protein	Nuts	Nuts	5-hydroxyindoleacetic acid	Urine	LC-Q-Tof, LTQ-Orbitrap	Tulipani et al., 2011
Starchy Foods/Vegetable protein	Nuts	Nuts	dodecanedioic acid	Urine	LC-Q-Tof, LTQ-Orbitrap	Tulipani et al., 2011
Starchy Foods/Vegetable protein	Nuts	Nuts- walnut	enterolactone glucuronide	Urine	HPLC-q-ToF-MS	Garcia-Aloy et al., 2014
Starchy Foods/Vegetable protein	Nuts	Nuts-Almonds	Ferulic acid glucuronide	Urine	LC-q-TOF MS	Llorach et al., 2010a
Starchy Foods/Vegetable protein	Nuts	Nuts-Almonds	Hydroxyhippuric acid	Urine	LC-q-TOF MS	Llorach et al., 2010a
Starchy Foods/Vegetable protein	Nuts	Nuts- walnut	hydroxyindoleacetic acid sulfate	Urine	HPLC-q-ToF-MS	Garcia-Aloy et al., 2014
Starchy Foods/Vegetable protein	Nuts	Nuts-Almonds	Isorhamnetin sulfate	Urine	LC-ESI-MS/MS	Bartolomé et al., 2010
Starchy Foods/Vegetable protein	Nuts	Nuts-Almonds	Isorhamnetin-O-glucuronide	Urine	LC-ESI-MS/MS	Bartolomé et al., 2010
Starchy Foods/Vegetable protein	Nuts	Nuts	N-acetylserotonin sulfate	Urine	LC-Q-Tof, LTQ-Orbitrap	Tulipani et al., 2011
Starchy Foods/Vegetable protein	Nuts	Nuts-Almonds	Naringenin-O-glucuronide	Urine	LC-q-TOF MS	Llorach et al., 2010a
Starchy Foods/Vegetable protein	Nuts	Nuts-Almonds	O-Methyl (epi)catechin sulfate	Urine	LC-q-TOF MS	Llorach et al., 2010a
Starchy Foods/Vegetable protein	Nuts	Nuts	p-coumaroyl alcohol-glucuronide	Urine	LC-Q-Tof, LTQ-Orbitrap	Tulipani et al., 2011
Starchy Foods/Vegetable protein	Nuts	Nuts	p-coumaroyl alcohol-sulfate	Urine	LC-Q-Tof, LTQ-Orbitrap	Tulipani et al., 2011
Starchy Foods/Vegetable protein	Nuts	Nuts	tridecadienoic	Urine	LC-Q-Tof, LTQ-Orbitrap	Tulipani et al., 2011
Starchy Foods/Vegetable protein	Nuts	Nuts	tridecynoic acid glucuronide	Urine	LC-Q-Tof, LTQ-Orbitrap	Tulipani et al., 2011
Starchy Foods/Vegetable protein	Nuts	Nuts- walnut	urolithin A glucuronide	Urine	HPLC-q-ToF-MS	Garcia-Aloy et al., 2014
Starchy Foods/Vegetable protein	Nuts	Nuts- walnut	urolithin A sulfate	Urine	HPLC-q-ToF-MS	Garcia-Aloy et al., 2014
Starchy Foods/Vegetable protein	Nuts	Nuts- walnut	urolithin A sulfoglucuronide	Urine	HPLC-q-ToF-MS	Garcia-Aloy et al., 2014
Starchy Foods/Vegetable protein	Nuts	Nuts- walnut	urolithin B glucuronide	Urine	HPLC-q-ToF-MS	Garcia-Aloy et al., 2014
Starchy Foods/Vegetable protein	Nuts	Nuts- walnut	urolithin C glucuronide	Urine	HPLC-q-ToF-MS	Garcia-Aloy et al., 2014
Starchy Foods/Vegetable protein	Nuts	Nuts- walnut	urolithin C sulfate	Urine	HPLC-q-ToF-MS	Garcia-Aloy et al., 2014
Starchy Foods/Vegetable protein	Nuts	Nuts	urolitin A-glucuronide	Urine	LC-Q-Tof, LTQ-Orbitrap	Tulipani et al., 2011
Starchy Foods/Vegetable protein	Nuts	Nuts	urolitin A-sulfate	Urine	LC-Q-Tof, LTQ-Orbitrap	Tulipani et al., 2011
Starchy Foods/Vegetable protein	Nuts	Nuts	urolitin A-sulfate-glucuronide	Urine	LC-Q-Tof, LTQ-Orbitrap	Tulipani et al., 2011
Starchy Foods/Vegetable protein	Nuts	Nuts-Almonds	Vanillic acid glucuronide	Urine	LC-q-TOF MS	Llorach et al., 2010a
Starchy Foods/Vegetable protein	Potatoes	potato	Calystegine A3	Urine	UHPLC -QQQ-MS	Beckmann et al., 2020
Starchy Foods/Vegetable protein	Potatoes	potato	Calystegine B2/B1	Urine	UHPLC -QQQ-MS	Beckmann et al., 2020
Cereal products, pasta, rice	White bread	White bread	2-Aminophenol sulfate	Urine	HPLC-q-TOF-MS	Garcia-Aloy et al., 2015a
Cereal products, pasta, rice	White bread	White bread	3,5-DHPPA glucuronide	Urine	HPLC-q-TOF-MS	Garcia-Aloy et al., 2015a
Cereal products, pasta, rice	White bread	White bread	HMBOA	Urine	HPLC-q-TOF-MS	Garcia-Aloy et al., 2015a
Cereal products, pasta, rice	White bread	White bread	HMBOA glucuronide	Urine	HPLC-q-TOF-MS	Garcia-Aloy et al., 2015a
Cereal products, pasta, rice	White bread	White bread	HPAA glucuronide	Urine	HPLC-q-TOF-MS	Garcia-Aloy et al., 2015a
Cereal products, pasta, rice	White bread	White bread	Hydroxybenzoic acid glucuronide	Urine	HPLC-q-TOF-MS	Garcia-Aloy et al., 2015a
Cereal products, pasta, rice	White bread	White bread	Riboflavin	Urine	HPLC-q-TOF-MS	Garcia-Aloy et al., 2015a
Cereal products, pasta, rice	Wholegrain general	Whole-grain bread	2,8-Dihydroxyquinoline glucuronide	Urine	LC-MS	Garcia-Aloy et al., 2015a
Cereal products, pasta, rice	Wholegrain general	Whole-grain bread	2-Aminophenol sulfate	Urine	LC-MS	Garcia-Aloy et al., 2015a
Cereal products, pasta, rice	Wholegrain general	Whole-grain bread	3,5-Dihydroxyphenylethanol sulfate	Urine	LC-MS	Garcia-Aloy et al., 2015a
Cereal products, pasta, rice	Wholegrain general	Whole-grain bread	3-Indole carboxylic acid glucuronide	Urine	LC-MS	Garcia-Aloy et al., 2015a
Cereal products, pasta, rice	Wholegrain general	Whole-grain bread	Dihydroferulic acid sulfate	Urine	LC-MS	Garcia-Aloy et al., 2015a
Cereal products, pasta, rice	Wholegrain general	Whole-grain bread	Enterolactone glucuronide	Urine	LC-MS	Garcia-Aloy et al., 2015a
Cereal products, pasta, rice	Wholegrain general	Whole-grain bread	HHPAA (2-Hydroxy-N-(2-hydroxyphenyl) acetamide) sulfate	Urine	LC-MS	Garcia-Aloy et al., 2015a
Cereal products, pasta, rice	Wholegrain general	Whole-grain bread	HMBOA	Urine	LC-MS	Garcia-Aloy et al., 2015a
Cereal products, pasta, rice	Wholegrain general	Whole-grain bread	HMBOA glucuronide	Urine	LC-MS	Garcia-Aloy et al., 2015a
Cereal products, pasta, rice	Wholegrain general	Whole-grain bread	HPAA (N-(2-Hydroxyphenyl) acetamide) sulfate	Urine	LC-MS	Garcia-Aloy et al., 2015a
Cereal products, pasta, rice	Wholegrain general	Whole-grain bread	HPAA glucuronide	Urine	LC-MS	Garcia-Aloy et al., 2015a
Cereal products, pasta, rice	Wholegrain general	Whole-grain bread	Hydroxybenzoic acid glucuronide	Urine	LC-MS	Garcia-Aloy et al., 2015a
Cereal products, pasta, rice	Wholegrain general	Whole-grain bread	Pyrraline	Urine	LC-MS	Garcia-Aloy et al., 2015a
Cereal products, pasta, rice	Wholegrain general	Whole-grain bread	Riboflavin	Urine	LC-MS	Garcia-Aloy et al., 2015a
Cereal products, pasta, rice	Wholegrain general	Wholegrain bread	DHBA (3,5-Dihydroxybenzoic acid)	Urine	LC-ESI-MS/MS	Zhu et al., 2014
Cereal products, pasta, rice	Wholegrain general	Wholegrain bread	DHBA (3,5-Dihydroxybenzoic acid) glucuronide	Urine	LC-ESI-MS/MS	Zhu et al., 2014
Cereal products, pasta, rice	Wholegrain general	Wholegrain bread	DHBA (3,5-Dihydroxybenzoic acid) glycine	Urine	LC-ESI-MS/MS	Zhu et al., 2014
Cereal products, pasta, rice	Wholegrain general	Wholegrain bread	DHBA (3,5-Dihydroxybenzoic acid) sulfate	Urine	LC-ESI-MS/MS	Zhu et al., 2014
Cereal products, pasta, rice	Wholegrain general	Wholegrain bread	DHPPA (3-(3,5-dihydroxyphenyl)-1-propanoic acid)	Urine	LC-ESI-MS/MS	Zhu et al., 2014
Cereal products, pasta, rice	Wholegrain general	Wholegrain bread	DHPPA (3-(3,5-dihydroxyphenyl)-1-propanoic acid) glucuronide	Urine	LC-ESI-MS/MS	Zhu et al., 2014
Cereal products, pasta, rice	Wholegrain general	Wholegrain bread	DHPPA (3-(3,5-dihydroxyphenyl)-1-propanoic acid) sulfate	Urine	LC-ESI-MS/MS	Zhu et al., 2014
Cereal products, pasta, rice	Wholegrain general	Wholegrain bread	DHPPTA (5-(3,5-dihydroxyphenyl)pentanoic acid)	Urine	LC-ESI-MS/MS	Zhu et al., 2014
Cereal products, pasta, rice	Wholegrain general	Wholegrain bread	DHPPTA (5-(3,5-dihydroxyphenyl)pentanoic acid) glucuronide	Urine	LC-ESI-MS/MS	Zhu et al., 2014
Cereal products, pasta, rice	Wholegrain general	Wholegrain bread	DHPPTA (5-(3,5-dihydroxyphenyl)pentanoic acid) sulfate	Urine	LC-ESI-MS/MS	Zhu et al., 2014
Cereal products, pasta, rice	Wholegrain general	Dietary Fibre	Hippuric acid	Urine	NMR	Rasmussen et al., 2012
Cereal products, pasta, rice	Wholegrain Rye	Rye bread (wholegrain)	2,4-Dihydroxy-1,4-benzoxazin-3-one sulphate	Urine	UPLC-QTOF/MS	Bondia-Pons et al., 2013
Cereal products, pasta, rice	Wholegrain Rye	Rye bread (wholegrain)	2-Aminophenol sulphate	Urine	UPLC-QTOF/MS	Bondia-Pons et al., 2013
Cereal products, pasta, rice	Wholegrain Rye	Rye bread (wholegrain)	3-(3,5-Dihydroxyphenyl)-1-propanoic acid glucuronide	Urine	UPLC-QTOF/MS	Bondia-Pons et al., 2013
Cereal products, pasta, rice	Wholegrain Rye	Rye bread (wholegrain)	3-(3,5-Dihydroxyphenyl)-1-propanoic acid sulphate	Urine	UPLC-QTOF/MS	Bondia-Pons et al., 2013
Cereal products, pasta, rice	Wholegrain Rye	Rye bread (wholegrain)	3,5-Dihydroxyhydrocinamic acid sulphate	Urine	UPLC-QTOF/MS	Bondia-Pons et al., 2013
Cereal products, pasta, rice	Wholegrain Rye	Rye bread (wholegrain)	3,5-Dihydroxyphenylethanol sulphate	Urine	UPLC-QTOF/MS	Bondia-Pons et al., 2013
Cereal products, pasta, rice	Wholegrain Rye	Rye	3,5‐dihydroxyphenylpropionic acid sulfate	Urine	LC-MS	Hanhineva et al., 2015
Cereal products, pasta, rice	Wholegrain Rye	Rye bread (wholegrain sourdough)	BOA (2-benzoxazolinone)	Urine	FT-ICR-MS and FIE-MSn	Beckmann et al., 2013
Cereal products, pasta, rice	Wholegrain Rye	Rye	Caffeic acid sulfate	Urine	LC-MS	Hanhineva et al., 2015
Cereal products, pasta, rice	Wholegrain Rye	Rye bread (wholegrain)	Enterolactone glucuronide	Urine	UPLC-QTOF/MS	Bondia-Pons et al., 2013
Cereal products, pasta, rice	Wholegrain Rye	Rye bread (wholegrain)	Ferulic acid-4-O-sulphate	Urine	UPLC-QTOF/MS	Bondia-Pons et al., 2013
Cereal products, pasta, rice	Wholegrain Rye	Rye bread (wholegrain sourdough)	HBOA (2-Hydroxy-1,4-benzoxazin-3-one) glucuronide	Urine	FT-ICR-MS and FIE-MSn	Beckmann et al., 2013
Cereal products, pasta, rice	Wholegrain Rye	Rye bread (wholegrain sourdough)	HHPAA (2-Hydroxy-N-(2-hydroxyphenyl) acetamide) sulfate	Urine	FT-ICR-MS and FIE-MSn	Beckmann et al., 2013
Cereal products, pasta, rice	Wholegrain Rye	Rye bread (wholegrain sourdough)	HHPAA (2-Hydroxy-N-(2-hydroxyphenyl)acetamide) glucuronide	Urine	FT-ICR-MS and FIE-MSn	Beckmann et al., 2013
Cereal products, pasta, rice	Wholegrain Rye	Rye bread (wholegrain sourdough)	HPAA (N-(2-Hydroxyphenyl) acetamide) sulfate	Urine	FT-ICR-MS and FIE-MSn	Beckmann et al., 2013
Cereal products, pasta, rice	Wholegrain Rye	Rye bread (wholegrain)	Indolylacryloylglycine	Urine	UPLC-QTOF/MS	Bondia-Pons et al., 2013
Cereal products, pasta, rice	Wholegrain Rye	Rye bread (wholegrain sourdough)	N-Feruloylglycine sulfate	Urine	FT-ICR-MS and FIE-MSn	Beckmann et al., 2013
Cereal products, pasta, rice	Wholegrain Rye	Rye bread (wholegrain)	Nonanedioic acid (azelaic acid)	Urine	UPLC-QTOF/MS	Bondia-Pons et al., 2013
Cereal products, pasta, rice	Wholegrain Rye	Rye bread (wholegrain sourdough)	Phenylacetylglutamine derivative	Urine	FT-ICR-MS and FIE-MSn	Beckmann et al., 2013
Cereal products, pasta, rice	Wholegrain Rye	Rye	Pimelic acid	Urine	LC-MS	Hanhineva et al., 2015
Baked or toasted products	Strongly Heated Foods	heat treated food (biscuits, cornflakes, roast beef)	pyrraline	Urine	UPLC-ESI-QTof	Andersen et al., 2014a
Baked or toasted products	Strongly Heated Foods	Heated meat	4′-OH-PhIP (2-amino- 1-methyl-6-(4′-hydroxyphenyl)imidazo[4,5-b]pyridine)	Urine	LPME and LC-MS/MS	Busquets et al., 2013
Baked or toasted products	Strongly Heated Foods	Heated meat	9H-pyrido[3,4-b]indole (norharman)	Urine	LPME and LC-MS/MS	Busquets et al., 2013
Baked or toasted products	Strongly Heated Foods	Heated meat	PhIP (2-Amino-1-methyl-6-phenylimidazo[4,5-b]pyridine)	Urine	LC-ESI-MS and and ESI/MS	Cuparencu et al., 2019a (Kidd et al., 1999)
Baked or toasted products	Strongly Heated Foods	Heated meat	MeIQx (2-Amino-3,8- dimethylimidazol4,5-f]quinoxaline)	Urine	GC-MS	Cuparencu et al., 2019a (Ji et al., 1994)
Baked or toasted products	Strongly Heated Foods	Heated meat	IQ (2-Amino-3-methylimidazo[4,5-f]quinoline)	Urine	LC-MS/MS	Kataoka et al., 2014
Baked or toasted products	Strongly Heated Foods	Heated meat	Trp-P-2 (3-amino-1-methyl-5H-pyrido[3,4-b]indole)	Urine	LC-MS/MS	Kataoka et al., 2014
Baked or toasted products	Strongly Heated Foods	Heated meat	Trp-P-1 (3-amino-1,4-dimethyl-5H-pyrido[3,4-b]indole)	Urine	LC-MS/MS	Kataoka et al., 2014
Baked or toasted products	Strongly Heated Foods	Heated meat	AαC (2-amino-9H-pyrido[2,3-b]indole)	Urine	LC-MS/MS	Kataoka et al., 2014
Baked or toasted products	Strongly Heated Foods	Heated meat	harman	Urine	LC-MS/MS	Kataoka et al., 2014
Baked or toasted products	Strongly Heated Foods	heat-processed animal source food	N-(4-methyl-5-oxo-1-imidazolin-2-yl)sarcosine (MG-HCr	Urine	HPLC-MS/MS	Treibmann et al., 2020
Baked or toasted products	Fried foods	Fried Potato (chips/french fries)	2,4-Dihydroxy-2,5-dimethyl-3(2H)-furanone glucuronide	Urine	UPLC-Qtof-MS	Zhou et al., 2020
Baked or toasted products	Fried foods	Fried Potato (chips/french fries)	2,4-Dihydroxy-2,5-dimethyl-3(2H)-furanone sulfate	Urine	UPLC-Qtof-MS	Zhou et al., 2020
Baked or toasted products	Fried foods	Fried Potato (chips/french fries)	4-(2-Formyl-5-(hydroxymethyl)-1H-pyrrol-1-yl)butanoic acid	Urine	UPLC-Qtof-MS	Zhou et al., 2020
Baked or toasted products	Fried foods	Fried Potato (chips/french fries)	4-(6-methyl-2-pyrazinyl)-1,2,3-Butanetriol	Urine	UPLC-Qtof-MS	Zhou et al., 2020
Baked or toasted products	Fried foods	Fried Potato (chips/french fries)	5-(Hydroxymethyl)-1H-pyrrole-2-carbaldehyde glucuronide	Urine	UPLC-Qtof-MS	Zhou et al., 2020
Baked or toasted products	Fried foods	Fried Potato (chips/french fries)	5-(Hydroxymethyl)-2-furaldehyde-glycine	Urine	UPLC-Qtof-MS	Zhou et al., 2020
Baked or toasted products	Fried foods	Potato crisps	acrylamide	Urine	LC-MS	Zhou et al., 2019 (Fuhr et al., 2006)
Baked or toasted products	Fried foods	Fried Potato (chips/french fries)	Furaneol glucuronide	Urine	UPLC-Qtof-MS	Zhou et al., 2020
Baked or toasted products	Fried foods	Potato crisps	N-acetyl-S-(1-carbamoyl-2-hydroxyethyl)-l-cysteine	Urine	UHPLC-MS/MS	wang et al., 2017
Baked or toasted products	Fried foods	Potato crisps	N-acetyl-S-(2-carbamoylethyl)-cysteine (AAMA)	Urine	HPLC-ESI-MS/MS	Watzek et al., 2012
Baked or toasted products	Fried foods	Potato crisps	N-acetyl-S-(2-carbamoylethyl)-l-cysteine-sulfoxide	Urine	UHPLC-MS/MS	wang et al., 2017
Baked or toasted products	Fried foods	Potato crisps	N-acetyl-S-(2-hydroxy-2-carbamoylethylcysteine (GAMA)	Urine	HPLC-ESI-MS/MS	Watzek et al., 2012
Baked or toasted products	Fried foods	Potato crisps	N-acetyl-S-(3-hydroxypropyl)cysteine (HPMA)	Urine	HPLC-ESI-MS/MS	Watzek et al., 2012
Baked or toasted products	Fried foods	Potato crisps	N-acetyl-S-(carboxyethyl)cysteine (CEMA)	Urine	HPLC-ESI-MS/MS	Watzek et al., 2012
Baked or toasted products	Fried foods	Fried Potato (chips/french fries)	Pyrraline	Urine	UPLC-Qtof-MS	Zhou et al., 2020
Baked or toasted products	Smoked foods	Hot dog (smoked sausage, bacon)	4-allylsyringol glucuronide	Urine	LC-Qtof-MS	Wedekind et al., 2019
Baked or toasted products	Smoked foods	Hot dog (smoked sausage, bacon)	4-ethylsyringol glucuronide	Urine	LC-Qtof-MS	Wedekind et al., 2019
Baked or toasted products	Smoked foods	Hot dog (smoked sausage, bacon)	4-methylsyringol glucuronide	Urine	LC-Qtof-MS	Wedekind et al., 2019
Baked or toasted products	Smoked foods	Hot dog (smoked sausage, bacon)	syringol glucuronide	Urine	LC-Qtof-MS	Wedekind et al., 2019
Eggs and Dairy	Gereral Dairy products	Dairy products	Equol	Urine	HPLC-MS/MS	Frankenfeld, 2011
Eggs and Dairy	Gereral Dairy products	milk	galactonate	Urine	GC-MS and 1H NMR	Münger et al., 2017
Eggs and Dairy	Gereral Dairy products	Milk	Blood group H disaccharide	Urine	HPLC	Pimentel et al., 2020
Eggs and Dairy	Gereral Dairy products	Milk	Galactonic acid/gluconic acid	Urine	HPLC	Pimentel et al., 2020
Eggs and Dairy	Cheese and other diary products	Cheese	4-hydroxyphenylacetic acid	Urine	UPLC-MS/QTOF	Hjerpsted et al., 2014
Eggs and Dairy	Cheese and other diary products	Cheese	indoxyl sulfate	Urine	UPLC-MS/QTOF	Hjerpsted et al., 2014
Eggs and Dairy	Cheese and other diary products	Cheese	isobutyrylglycine	Urine	UPLC-MS/QTOF	Hjerpsted et al., 2014
Eggs and Dairy	Cheese and other diary products	Cheese	isovalerylglutamic acid	Urine	UPLC-MS/QTOF	Hjerpsted et al., 2014
Eggs and Dairy	Cheese and other diary products	Cheese	isovalerylglycine	Urine	UPLC-MS/QTOF	Hjerpsted et al., 2014
Eggs and Dairy	Cheese and other diary products	Cheese	tiglylglycine	Urine	UPLC-MS/QTOF	Hjerpsted et al., 2014
Eggs and Dairy	Cheese and other diary products	Cheese	tyramine sulfate	Urine	UPLC-MS/QTOF	Hjerpsted et al., 2014
Eggs and Dairy	Cheese and other diary products	Cheese	xanthurenic acid	Urine	UPLC-MS/QTOF	Hjerpsted et al., 2014
Eggs and Dairy	Cheese and other diary products	cheese	3-phenyllactic acid	Urine	GC-MS and 1H NMR	Münger et al., 2017
Eggs and Dairy	Cheese and other diary products	cheese	pyroglutamic acid	Urine	GC-MS and 1H NMR	Münger et al., 2017
Eggs and Dairy	Cheese and other diary products	Cheese	butyrate	Urine	NMR	Zheng et al., 2015
Eggs and Dairy	Cheese and other diary products	Cheese	Hippuric acid	Urine	NMR	Zheng et al., 2015
Eggs and Dairy	Cheese and other diary products	Cheese	malonate	Urine	NMR	Zheng et al., 2015
Eggs and Dairy	Cheese and other diary products	Cheese	Phenylalanyl-proline	Urine	HPLC	Pimentel et al., 2020
Eggs and Dairy	Cheese and other diary products	Cheese	Indolelactic acid	Urine	HPLC	Pimentel et al., 2020
Meats	General meat	animal protein (beef and fish)	(phospho-) choline	Urine	NMR	Heinzmann,et al., 2012
Meats	General meat	Animal protein	13C/12C ratio, expressed as δ13C and 15N/14N ratio, expressed as δ15N	Urine	isotope ratio–monitoring MS	Kuhnle et al., 2013
Meats	General meat	Meat protein (Pork, beef and chicken)	1-Methyl Histidine	Urine	QQQ-MS	Altorf-van der Kuil et al., 2013
Meats	General meat	Red meat and fish	2-methylbutyrylcarnitine	Urine	HPLC-MS	Cheung et al., 2017
Meats	General meat	animal protein (beef and fish)	3-methylhistidine	Urine	NMR	Heinzmann,et al., 2012
Meats	General meat	All meat	4',6,7,8-Tetrahydroxyisoflavone sulphate	Urine	LC-ESI-qTOF-MS	Cuparencu et al.,2019b
Meats	General meat	All meat	4-cyano-2-aminobutanoic acid	Urine	LC-ESI-qTOF-MS	Cuparencu et al.,2019b
Meats	General meat	All meat	8-hydroxyglycitein glucuronide	Urine	LC-ESI-qTOF-MS	Cuparencu et al.,2019b
Meats	General meat	Red meat and fish	acetylcarnitine	Urine	HPLC-MS	Cheung et al., 2017
Meats	General meat	animal protein (beef and fish)	carnitine	Urine	NMR	Heinzmann,et al., 2012
Meats	General meat	Meat protein (Pork, beef and chicken)	Carnosine	Urine	QQQ-MS	Altorf-van der Kuil et al., 2013
Meats	General meat	Meat (all, general)	Creatine	Urine	UPLC-MS/MS	Playdon et al., 2016
Meats	General meat	All meat	N-(1-Methyl-4-hydroxy-3-imidazolin-2,2-ylidene)alanine	Urine	LC-ESI-qTOF-MS	Cuparencu et al.,2019b
Meats	General meat	Red meat and fish	propionylcarnitine	Urine	HPLC-MS	Cheung et al., 2017
Meats	General meat	animal protein (beef and fish)	Taurine	Urine	NMR	Heinzmann,et al., 2012
Meats	General meat	animal protein (beef and fish)	TMAO (trimethylamine N-oxide)	Urine	NMR	Heinzmann,et al., 2012
Meats	Red meat	Meat (red)	1-Methylhistidine	Urine	Ion exchange chromatography	Cross et al., 2011
Meats	Red meat	Red meat	3-Dehydrocarnitine	Urine	UPLC-MS/MS	Playdon et al., 2016
Meats	Red meat	Meat (red)	3-Methylhistidine	Urine	Ion exchange chromatography	Cross et al., 2011
Meats	Red meat	Red meat	5-methyl-2- thiophene-carboxaldehyde-mercapturate (5-MCTA)	Urine	LC-ESI-qTOF-MS	Cuparencu et al.,2019b
Meats	Red meat	Red meat	Acetylcarnitine	Urine	UPLC-MS/MS	Playdon et al., 2016
Meats	Red meat	Beef	Carnosine	Urine	LC–ESI-MS/MS	Yeum et al., 2010
Meats	Red meat	Meat (red)	creatinine	Urine	Ion exchange chromatography	Cross et al., 2011
Meats	Red meat	Red meat	isoleucyl-hydroxyproline (Ile-Hyp)	Urine	LC-ESI-qTOF-MS	Cuparencu et al.,2019b
Meats	Red meat	Red meat	leucyl-hydroxyproline (Leu-Hyp)	Urine	LC-ESI-qTOF-MS	Cuparencu et al.,2019b
Meats	Red meat	Red meat	N,N-dimethylgycine	Urine	NMR	O'Sullivan et al., 2011
Meats	Red meat	Red meat	Norfuraneol Sulphate	Urine	LC-ESI-qTOF-MS	Cuparencu et al.,2019b
Meats	Red meat	Red meat	O-acetylcarnitine	Urine	NMR	Xu et al., 2010
Meats	Red meat	Red meat	Prolyl-1-pyrroline-5-carboxylic acid (Pro-1-P5C)	Urine	LC-ESI-qTOF-MS	Cuparencu et al.,2019b
Meats	Red meat	Red meat	prolyl-hydroxyproline (Pro-Hyp)	Urine	LC-ESI-qTOF-MS	Cuparencu et al.,2019b
Meats	Red meat	Red meat	prolyl-hydroxyprolyl-glycine (Pro-Hyp-Gly)	Urine	LC-ESI-qTOF-MS	Cuparencu et al.,2019b
Meats	Red meat	Meat (red)	Taurine	Urine	Ion exchange chromatography	Cross et al., 2011
Meats	Red meat	Red meat	Xylitol	Urine	GC-MS	Playdon et al., 2016
Meats	Red meat	Red meat	α-glutamyl-L-hydroxyproline (α-Glu-Hyp)	Urine	LC-ESI-qTOF-MS	Cuparencu et al.,2019b
Meats	Red meat	Red meat	α-glutamyl-L-hydroxyprolyl-glycine (α-Glu-L-Hyp-Gly)	Urine	LC-ESI-qTOF-MS	Cuparencu et al.,2019b
Meats	Processed meats (inc. cured, smoked)	preserved meats and fishes	NMTCA (N-nitroso-2-methylthiazolidine-4-carboxylic acid)	Urine	GC-TEA	Xu et al., 2015
Meats	Processed meats (inc. cured, smoked)	Processed meat	Acetylcarnitine	Urine	UPLC-MS/MS	Playdon et al., 2016
Meats	Processed meats (inc. cured, smoked)	Processed meat	N-nitrosoproline	Urine	GC-TEA	Xu et al., 2015
Meats	Poultry	Poultry	3-Methyl-histidine	Urine	HPLC-MS	Cheung et al., 2017
Meats	Poultry	Chicken	anserine	Urine	LC–ESI-MS/MS	Yeum et al., 2010
Meats	Poultry	Chicken	Carnosine	Urine	LC–ESI-MS/MS	Yeum et al., 2010
Meats	Poultry	Poultry	Guanidinoacetate	Urine	NMR	Yin et al., 2017
Meats	Fish (all)	Fish	CMPF (3-​carboxy-​4-​methyl-​5-​propyl-​2-​furanpropanoic acid)	Urine	UPLC-MS/MS	Playdon et al., 2016
Meats	Fish (all)	Fish	Trimethylamine N-oxide	Urine	UPLC-qTOF-MS	Andersen et al., 2013
Meats	Fish (all)	Cod	1,2,3,4-tetrahydro-β-carboline-3-carboxylic acid (THCC)	Urine	UPLC and ESI-Q-TOF-MS and MS/MS	Stanstrup et al., 2014
Meats	Fish (all)	Cod	Arsenobetaine	Urine	UPLC and ESI-Q-TOF-MS and MS/MS	Stanstrup et al., 2014
Meats	Fish (all)	Cod	N6,N6,N6-trimethyl-lysine (TML)	Urine	UPLC and ESI-Q-TOF-MS and MS/MS	Stanstrup et al., 2014
Meats	Fish (oily, fatty)	Salmon	1-Methylhistidine	Urine	FT-ICR-MS and FIE-MSn	Lloyd et al., 2011
Meats	Fish (oily, fatty)	oily Fish	3-carboxy-4-methyl-5-propyl-2-furanpropionic acid (CMPF)	Urine	UPLC-MS/MS	Playdon et al., 2016
Meats	Fish (oily, fatty)	Salmon	3-Methylhistidine	Urine	FT-ICR-MS and FIE-MSn	Lloyd et al., 2011
Meats	Fish (oily, fatty)	Salmon	Anserine	Urine	FT-ICR-MS and FIE-MSn	Lloyd et al., 2011
Meats	Fish (oily, fatty)	Salmon	TMAO (trimethylamine N-oxide)	Urine	FT-ICR-MS and FIE-MSn	Lloyd et al., 2011
Meats	Shellfish	Shellfish	2-Hydroxybutyric acid	Urine	GC-MS	Playdon et al., 2016
Meats	Shellfish	Shellfish	Ciliatine	Urine	GC-MS	Playdon et al., 2016
Meats	Shellfish	Shellfish	CMPF (3-​carboxy-​4-​methyl-​5-​propyl-​2-​furanpropanoic acid)	Urine	UPLC-MS/MS	Playdon et al., 2016
Meats	Shellfish	Shellfish	Lysine	Urine	GC-MS	Playdon et al., 2016
Meats	Poultry and fish	White meat	3-methyl histidine	Urine	LC-ESI-qTOF-MS	Cuparencu et al.,2019b
Meats	Poultry and fish	White meat	Anserine	Urine	LC-ESI-qTOF-MS	Cuparencu et al.,2019b
Meats	Other meat	Offal meat	DHN-MA (dihydroxynonene mercapturic acid)	Urine	competitive enzyme immunoassay	Cuparencu et lal., 2019a (Pierre et al.,2006)

## Sheet: Supporting data 1-References 
Reference(s)
Altorf-van der Kuil et al., 2013	Altorf-van der Kuil, W., Brink, E. J., Boetje, M., Siebelink, E., et al., Identification of biomarkers for intake of protein from meat, dairy products and grains: a controlled dietary intervention study. British Journal of Nutrition 2013, 110, 810-822.
Andersen et al., 2013	Andersen M-BS, Reinbach HC, Rinnan Å, Barri T, Mithril C, Dragsted LO. Discovery of exposure markers in urine for Brassica-containing meals served with different protein sources by UPLC-qTOF-MS untargeted metabolomics. Metabolomics. 2013;9(5):984-97.
Andersen et al., 2014a	Andersen M-BS, Rinnan Å, Manach C, Poulsen SK, Pujos-Guillot E, Larsen TM, et al. Untargeted Metabolomics as a Screening Tool for Estimating Compliance to a Dietary Pattern. Journal of Proteome Research. 2014;13(3):1405-18.
Andersen et al., 2014b	Andersen M-BS, Kristensen M, Manach C, Pujos-Guillot E, Poulsen SK, Larsen TM, et al. Discovery and validation of urinary exposure markers for different plant foods by untargeted metabolomics. Analytical and Bioanalytical Chemistry. 2014;406(7):1829-44.
Bartolomé et al., 2010	Bartolomé B, Monagas M, Garrido I, Gómez-Cordovés C, Martín-Álvarez PJ, Lebrón-Aguilar R, et al. Almond (Prunus dulcis (Mill.) D.A. Webb) polyphenols: From chemical characterization to targeted analysis of phenolic metabolites in humans. Archives of Biochemistry and Biophysics. 2010;501(1):124-133.
Beckmann et al., 2013	Beckmann M, Lloyd AJ, Haldar S, Seal C, Brandt K, Draper J. Hydroxylated phenylacetamides derived from bioactive benzoxazinoids are bioavailable in humans after habitual consumption of whole grain sourdough rye bread. Molecular Nutrition & Food Research. 2013;57(10):1859-73.
Beckmann et al., 2020	Beckmann, M., A.J., L., Wilson, T., Torres, D., Goios, A., Willis, N., Lyons, L., Phillips, H., Mathers, J., Nash, R., Sharp, H., Draper, J., Calystegines are potential urine biomarkers for dietary exposure to potato products. Mol Nutr Food Res 2020, 2000515.
Bondia-Pons et al., 2013	Bondia-Pons I, Barri T, Hanhineva K, Juntunen K, Dragsted LO, Mykkänen H, et al. UPLC-QTOF/MS metabolic profiling unveils urinary changes in humans after a whole grain rye versus refined wheat bread intervention. Molecular Nutrition & Food Research. 2013;57(3):412-22.
Boto-Ordóñez et al., 2013	Boto-Ordóñez M, Urpi-Sarda M, Queipo-Ortuño MI, Corella D, Tinahones FJ, Estruch R, et al. Microbial Metabolomic Fingerprinting in Urine after Regular Dealcoholized Red Wine Consumption in Humans. Journal of Agricultural and Food Chemistry. 2013;61(38):9166-75.
Busquets et al., 2013	Busquets R, Frandsen H, Jonsson JA, Puignou L, Teresa Galceran M, Skog K.Biomonitoring of dietary heterocyclic amines and metabolites in urine by liquid phase microextraction: 2-amino-1-methyl-6-phenylimidazo 4,5-b pyridine (PhIP), a possible biomarker of exposure to dietary PhIP. Chem Res Toxicol. 2013;26(2):233–40.
Cheung et al., 2017	Cheung W, Keski-Rahkonen P, Assi N, Ferrari P, Freisling H, Rinaldi S, et al. A metabolomic study of biomarkers of meat and fish intake. Am J Clin Nutr. 2017;105(3):600–8.
Cross et al., 2011	Cross AJ, Major JM, Sinha R. Urinary Biomarkers of Meat Consumption. Cancer Epidemiology Biomarkers &amp; Prevention. 2011;20(6):1107-11.
Cuparencu et al., 2016	Cuparencu, C. S., Andersen, M.-B. S., Gürdeniz, G., Schou, S. S., et al., Identification of urinary biomarkers after consumption of sea buckthorn and strawberry, by untargeted LC–MS metabolomics: a meal study in adult men. Metabolomics 2016, 12, 31.
Cuparencu et al., 2019a	Cuparencu, C., Praticó, G., Hemeryck, L. Y., Sri Harsha, P. S. C., et al., Biomarkers of meat and seafood intake: an extensive literature review. Genes & Nutrition 2019, 14, 35.
Cuparencu et al.,2019b	Cuparencu, C., Rinnan, Å., Dragsted, L. O., Combined Markers to Assess Meat Intake—Human Metabolomic Studies of Discovery and Validation. Molecular Nutrition & Food Research 2019, 63, 1900106.
Edmands et al., 2015	Edmands, W. M., Ferrari, P., Rothwell, J. A., Rinaldi, S., et al., Polyphenol metabolome in human urine and its association with intake of polyphenol-rich foods across European countries. The American Journal of Clinical Nutrition 2015, 102, 905-913.
Franke et al., 2010	Franke, A. A., Hebshi, S. M., Pagano, I., Kono, N., et al., Urine accurately reflects circulating isoflavonoids and ascertains compliance during soy intervention. Cancer epidemiology, biomarkers & prevention : a publication of the American Association for Cancer Research, cosponsored by the American Society of Preventive Oncology 2010, 19, 1775-1783.
Frankenfeld, 2011	Frankenfeld CL. Dairy consumption is a significant correlate of urinary equol concentration in a representative sample of US adults. The American Journal of Clinical Nutrition. 2011;93(5):1109-16.
Fuhr et al., 2006	Fuhr, U., Boettcher, M. I., Kinzig-Schippers, M., Weyer, A., et al., Toxicokinetics of acrylamide in humans after ingestion of a defined dose in a test meal to improve risk assessment for acrylamide carcinogenicity. Cancer epidemiology, biomarkers & prevention : a publication of the American Association for Cancer Research, cosponsored by the American Society of Preventive Oncology 2006, 15, 266-…
Fujioka et al., 2014	Fujioka N, Ainslie-Waldman CE, Upadhyaya P, Carmella SG, Fritz VA, Rohwer C, et al. Urinary 3,3′-diindolylmethane: a biomarker of glucobrassicin exposure and indole-3-carbinol uptake in humans. Cancer epidemiology, biomarkers & prevention : a publication of the American Association for Cancer Research, cosponsored by the American Society of Preventive Oncology. 2014;23(2):282-7.
Garcia-Aloy et al., 2014	Garcia-Aloy M, Llorach R, Urpi-Sarda M, Tulipani S, Estruch R, Martínez-González MA, et al. Novel Multimetabolite Prediction of Walnut Consumption by a Urinary Biomarker Model in a Free-Living Population: the PREDIMED Study. Journal of Proteome Research. 2014;13(7):3476-83.
Garcia-Aloy et al., 2015a	Garcia-Aloy M, Llorach R, Urpi-Sarda M, Tulipani S, Salas-Salvadó J, Martínez-González MA, et al. Nutrimetabolomics fingerprinting to identify biomarkers of bread exposure in a free-living population from the PREDIMED study cohort. METABOLOMICS. 2015;11(1):155-65.
Garcia-Aloy et al., 2015b	Garcia-Aloy, M., Llorach, R., Urpi-Sarda, M., Jáuregui, O., et al., A metabolomics-driven approach to predict cocoa product consumption by designing a multimetabolite biomarker model in free-living subjects from the PREDIMED study. Molecular Nutrition & Food Research 2015, 59, 212-220.
Garcia-Aloy et al., 2020	Garcia-Aloy, M., Ulaszewska, M., Franceschi, P., Estruel-Amades, S., Weinert, C. H., Tor-Roca, A., Urpi-Sarda, M., Mattivi, F., Andres-Lacueva, C., Discovery of Intake Biomarkers of Lentils, Chickpeas, and White Beans by Untargeted LC–MS Metabolomics in Serum and Urine. Molecular Nutrition & Food Research 2020, 64, e1901137.
Garcia-Perez et al., 2016	Garcia-Perez, I., Posma, J. M., Chambers, E. S., Nicholson, J. K., et al., An Analytical Pipeline for Quantitative Characterization of Dietary Intake: Application To Assess Grape Intake. J Agric Food Chem 2016, 64, 2423-2431.
Gibbons et al., 2015	Gibbons H, McNulty BA, Nugent AP, Walton J, Flynn A, Gibney MJ, et al. A metabolomics approach to the identification of biomarkers of sugar-sweetened beverage intake. The American Journal of Clinical Nutrition. 2015;101(3):471-7.
González-Barrio et al., 2010	González-Barrio, R., Borges, G., Mullen, W., Crozier, A., Bioavailability of Anthocyanins and Ellagitannins Following Consumption of Raspberries by Healthy Humans and Subjects with an Ileostomy. Journal of Agricultural and Food Chemistry 2010, 58, 3933-3939.
Hanhineva et al., 2015	Hanhineva, K., Brunius, C., Andersson, A., Marklund, M., et al., Discovery of urinary biomarkers of whole grain rye intake in free-living subjects using nontargeted LC-MS metabolite profiling. Molecular Nutrition & Food Research 2015, 59, 2315-2325.
Hauder et al., 2011	Hauder J, Winkler S, Bub A, Rüfer CE, Pignitter M, Somoza V. LC-MS/MS Quantification of Sulforaphane and Indole-3-carbinol Metabolites in Human Plasma and Urine after Dietary Intake of Selenium-Fortified Broccoli. Journal of Agricultural and Food Chemistry. 2011;59(15):8047-57.
Heinzmann et al., 2012	Heinzmann SS, Merrifield CA, Rezzi S, Kochhar S, Lindon JC, Holmes E, et al. Stability and Robustness of Human Metabolic Phenotypes in Response to Sequential Food Challenges. Journal of Proteome Research. 2012;11(2):643-55.
Heinzmann et al., 2015	Heinzmann SS, Holmes E, Kochhar S, Nicholson JK, Schmitt-Kopplin P. 2-Furoylglycine as a Candidate Biomarker of Coffee Consumption. Journal of Agricultural and Food Chemistry. 2015;63(38):8615-21.
Hjerpsted et al., 2014	Hjerpsted JB, Ritz C, Schou SS, Tholstrup T, Dragsted LO. Effect of cheese and butter intake on metabolites in urine using an untargeted metabolomics approach. Metabolomics. 2014;10(6):1176-85.
Hövelmann, et al., 2020	Hövelmann, Y., Jagels, A., Schmid, R., Hübner, F., Humpf, H.-U., Identification of potential human urinary biomarkers for tomato juice intake by mass spectrometry-based metabolomics. European Journal of Nutrition 2020, 59, 685-697.
Jacobs et al., 2012	Jacobs DM, Fuhrmann JC, van Dorsten FA, Rein D, Peters S, van Velzen EJJ, et al. Impact of Short-Term Intake of Red Wine and Grape Polyphenol Extract on the Human Metabolome. Journal of Agricultural and Food Chemistry. 2012;60(12):3078-85.
Jandke and Spiteller, 1987	Jandke, J., Spiteller, G., Unusual conjugates in biological profiles originating from consumption of onions and garlic. Journal of Chromatography B: Biomedical Sciences and Applications 1987, 421, 1-8.
Ji et al., 1994	Ji, H., Yu, M. C., Stillwell, W. G., Skipper, P. L., et al., Urinary excretion of 2-amino-3,8-dimethylimidazo-[4,5-f]quinoxaline in white, black, and Asian men in Los Angeles County. Cancer Epidemiology Biomarkers &amp; Prevention 1994, 3, 407-411.
Kahle et al., 2011	Kahle K, Kempf M, Schreier P, Scheppach W, Schrenk D, Kautenburger T, et al. Intestinal transit and systemic metabolism of apple polyphenols. European Journal of Nutrition. 2011;50(7):507-22.
Kataoka et al., 2014	Kataoka H, Inoue T, Ikekita N, Saito K. Development of exposure assessment method based on the analysis of urinary heterocyclic amines as biomarkers by on-line in-tube solid-phase microextraction coupled with liquid chromatography-tandem mass spectrometry Microextraction Techniques.Anal Bioanal Chem. 2014;406(8):2171–8.
Khymenets et al., 2015	Khymenets, O., Andres-Lacueva, C., Urpi-Sarda, M., Vazquez-Fresno, R., et al., Metabolic fingerprint after acute and under sustained consumption of a functional beverage based on grape skin extract in healthy human subjects. Food & function 2015, 6, 1288-1298.
Kidd et al., 1999	Kidd, L. C. R., Stillwell, W. G., Yu, M. C., Wishnok, J. S., et al., Urinary Excretion of 2-Amino-1-methyl-6-phenylimidazo[4,5-<em>b</em>]pyridine (PhIP) in White, African-American, and Asian-American Men in Los Angeles County. Cancer Epidemiology Biomarkers &amp; Prevention 1999, 8, 439-445.
Krogholm et al., 2010	Krogholm, K. S., Bredsdorff, L., Alinia, S., Christensen, T., Rasmussen, S. E., Dragsted, L. O., Free fruit at workplace intervention increases total fruit intake: a validation study using 24 h dietary recall and urinary flavonoid excretion. European Journal of Clinical Nutrition 2010, 64, 1222-1228.
Kuhnle et al., 2013	Kuhnle GGC, Joosen A, Kneale CJ, O'Connell TC. Carbon and nitrogen isotopic ratios of urine and faeces as novel nutritional biomarkers of meat and fish intake. Eur J Nutr. 2013;52(1):389–95.
Lang et al., 2011	Lang R, Wahl A, Stark T, Hofmann T. Urinary N‐methylpyridinium and trigonelline as candidate dietary biomarkers of coffee consumption. Molecular Nutrition & Food Research. 2011;55(11):1613-23.
Llorach et al., 2010a	Llorach R, Garrido I, Monagas M, Urpi-Sarda M, Tulipani S, Bartolome B, et al. Metabolomics Study of Human Urinary Metabolome Modifications After Intake of Almond (Prunus dulcis (Mill.) D.A. Webb) Skin Polyphenols. Journal of Proteome Research. 2010;9(11):5859-67.
Llorach et al., 2010b	Llorach-Asunción, R., O. Jauregui, M. Urpi-Sarda and C. Andres-Lacueva. (2010). "Methodological aspects for metabolome visualization and characterization: A metabolomic evaluation of the 24h evolution of human urine after cocoa powder consumption." Journal of Pharmaceutical and Biomedical Analysis 51,(2): 373-381.
Llorach et al., 2013	Llorach R, Urpi‐Sarda M, Tulipani S, Garcia‐Aloy M, Monagas M, Andres‐Lacueva C. Metabolomic fingerprint in patients at high risk of cardiovascular disease by cocoa intervention. Molecular Nutrition & Food Research. 2013;57(6):962-73.
Lloyd et al 2013	Lloyd AJ, Beckmann M, Haldar S, Seal C, Brandt K, Draper J. Data-driven strategy for the discovery of potential urinary biomarkers of habitual dietary exposure. Am J Clin Nutr. 2013;97:377–89.
Lloyd et al., 2011	Lloyd AJ, Fave G, Beckmann M, Lin W, Tailliart K, Xie L, et al. Use of mass spectrometry fingerprinting to identify urinary metabolites after consumption of specific foods. Am J Clin Nutr. 2011;94(4):981-91.
Logue et al., 2017	Logue, C., Dowey, L. R. C., Strain, J. J., Verhagen, H., et al., Application of Liquid Chromatography–Tandem Mass Spectrometry To Determine Urinary Concentrations of Five Commonly Used Low-Calorie Sweeteners: A Novel Biomarker Approach for Assessing Recent Intakes? Journal of Agricultural and Food Chemistry 2017, 65, 4516-4525.
Lynn et al., 2019	Lynn, K.-S., Cheng, M.-L., Yang, H.-C., Liang, Y.-J., et al., Vegetable Signatures Derived from Human Urinary Metabolomic Data in Controlled Feeding Studies. Journal of Proteome Research 2019, 18, 159-168.
Madrid-Gambin et al., 2017	Madrid-Gambin, F., Llorach, R., Vázquez-Fresno, R., Urpi-Sarda, M., et al., Urinary 1H Nuclear Magnetic Resonance Metabolomic Fingerprinting Reveals Biomarkers of Pulse Consumption Related to Energy-Metabolism Modulation in a Subcohort from the PREDIMED study. Journal of Proteome Research 2017, 16, 1483-1491.
Mair et al.,2018	Mair, R. D., Sirich, T. L., Plummer, N. S., Meyer, T. W., Characteristics of Colon-Derived Uremic Solutes. Clinical journal of the American Society of Nephrology : CJASN 2018, 13, 1398-1404.
Makarova et al., 2014	Makarova E, Górnaś P, Konrade I, Tirzite D, Cirule H, Gulbe A, Pugajeva I,Seglina D, Dambrova M. Acute anti-hyperglycaemic effects of an unripe apple preparation containing phlorizin in healthy volunteers: a preliminary study. J Sci Food Agric. 2014;95:560–8.
Martin et al., 2012	Martin F-PJ, Montoliu I, Nagy K, Moco S, Collino S, Guy P, et al. Specific Dietary Preferences Are Linked to Differing Gut Microbial Metabolic Activity in Response to Dark Chocolate Intake. Journal of Proteome Research. 2012;11(12):6252-63.
Martínez-López et al., 2014	Martinez-Lopez S, Sarria B, Gomez-Juaristi M, Goya L, Mateos R, Bravo-Clemente L. Theobromine, caffeine, and theophylline metabolites in human plasma and urine after consumption of soluble cocoa products with different methylxanthine contents. Food Res Int. 2014;63:446-55.
May et al., 2013	May DH, Navarro SL, Ruczinski I, Hogan J, Ogata Y, Schwarz Y, et al. Metabolomic profiling of urine: response to a randomised, controlled feeding study of select fruits and vegetables, and application to an observational study. British Journal of Nutrition. 2013;110(10):1760-1770.
McNamara et al., 2020	McNamara, A. E., Collins, C., Harsha, P., González-Peña, D., Gibbons, H., McNulty, B. A., Nugent, A. P., Walton, J., Flynn, A., Brennan, L., Metabolomic-Based Approach to Identify Biomarkers of Apple Intake. Mol Nutr Food Res 2020, 64, e1901158.
Münger et al., 2017	Münger, L. H., Trimigno, A., Picone, G., Freiburghaus, C., et al., Identification of Urinary Food Intake Biomarkers for Milk, Cheese, and Soy-Based Drink by Untargeted GC-MS and NMR in Healthy Humans. Journal of Proteome Research 2017, 16, 3321-3335.
O'Sullivan et al., 2011	O'Sullivan A, Gibney MJ, Brennan L. Dietary intake patterns are reflected in metabolomic profiles: potential role in dietary assessment studies. The American Journal of Clinical Nutrition. 2011;93(2):314-21.
Pierre et al.,2006	Pierre, F., Peiro, G., Taché, S., Cross, A. J., et al., New Marker of Colon Cancer Risk Associated with Heme Intake: 1,4-Dihydroxynonane Mercapturic Acid. Cancer Epidemiology Biomarkers &amp; Prevention 2006, 15, 2274-2279..
Pimentel et al., 2020	Pimentel, G., D. Burnand, L. H. Münger, F. P. Pralong, N. Vionnet, R. Portmann, et al. (2020). "Identification of Milk and Cheese Intake Biomarkers in Healthy Adults Reveals High Interindividual Variability of Lewis System–Related Oligosaccharides." The Journal of Nutrition 150,(5): 1058-1067.
Playdon et al., 2016	Playdon, M. C., Sampson, J. N., Cross, A. J., Sinha, R., et al., Comparing metabolite profiles of habitual diet in serum and urine. Am J Clin Nutr 2016, 104, 776-789.
Posma et al., 2017	Posma JM, Garcia-Perez I, Heaton JC, Burdisso P, Mathers JC, Draper J, et al.Integrated analytical and statistical two-dimensional spectroscopy strategy for metabolite identification: application to dietary biomarkers. Anal Chem.2017;89:3300–9.
Praticò et al., 2018	Praticò, G., Gao, Q., Manach, C., Dragsted, L. O., Biomarkers of food intake for Allium vegetables. Genes & Nutrition 2018, 13, 34
Quifer-Rada et al., 2014	Quifer-Rada P, Vallverdú-Queralt A, Martínez-Huélamo M, Chiva-Blanch G, Jáuregui O, Estruch R, et al. A comprehensive characterisation of beer polyphenols by high resolution mass spectrometry (LC–ESI-LTQ-Orbitrap-MS). Food Chemistry. 2015;169(336-343.
Rasmussen et al., 2012	Rasmussen LG, Winning H, Savorani F, Ritz C, Engelsen SB, Astrup A, et al. Assessment of dietary exposure related to dietary GI and fibre intake in a nutritional metabolomic study of human urine. Genes & Nutrition. 2012;7(2):281-293.
Rothwell et al., 2014	Rothwell JA, Fillâtre Y, Martin J-F, Lyan B, Pujos-Guillot E, Fezeu L, et al. New Biomarkers of Coffee Consumption Identified by the Non-Targeted Metabolomic Profiling of Cohort Study Subjects. PLOS ONE. 2014;9(4):e93474
S C Sri Harsha et al., 2018	S C Sri Harsha, P., Abdul Wahab, R., Cuparencu, C., Dragsted, L. O., Brennan, L., A Metabolomics Approach to the Identification of Urinary Biomarkers of Pea Intake. Nutrients 2018, 10, 1911.
Saenger et al., 2017	Saenger T, Hübner F, Humpf HU. Short-term biomarkers of apple consumption. Mol Nutr Food Res. 2017;61:1158–1165.
Saha et al., 2012	Shikha S, Wendy H, Birgit T, W. NP, Arjan N, A. OC, et al. Isothiocyanate concentrations and interconversion of sulforaphane to erucin in human subjects after consumption of commercial frozen broccoli compared to fresh broccoli. Molecular Nutrition & Food Research. 2012;56(12):1906-1916.
Scheffler et al., 2016	Scheffler L, Sauermann Y, Heinlein A, Sharapa C, Buettner A. Detection of volatile metabolites derived from garlic (Allium sativum) in human urine. Metabolites. 2016;6:43.
Shi et al., 2015	Shi Y, Williamson G. Comparison of the urinary excretion of quercetin glycosides from red onion and aglycone from dietary supplements in healthy subjects: a randomized, single-blinded, cross-over study. Food Funct. 2015;6:1443–8.
Stalmach et al., 2011	Stalmach A, Mullen W, Barron D, Uchida K, Yokota T, Cavin C, et al. Metabolite Profiling of Hydroxycinnamate Derivatives in Plasma and Urine after the Ingestion of Coffee by Humans: Identification of Biomarkers of Coffee Consumption. Drug Metabolism and Disposition. 2009;37(8):1749-58.
Stalmach et al., 2014	Stalmach A, Williamson G, Crozier A. Impact of dose on the bioavailability of coffee chlorogenic acids in humans. Food Funct. 2014;5:1727–37.
Stanoeva and Stefova, 2013	Petreska Stanoeva J , Stefova M. Assay of Urinary Excretion of Polyphenols after Ingestion of a Cup of Mountain Tea (Sideritis scardica) Measured by HPLC-DAD-ESI-MS/MS. Journal of Agricultural and Food Chemistry. 2013;61(44):10488-10497.
Stanstrup et al., 2014	Stanstrup, J., Schou, S. S., Holmer-Jensen, J., Hermansen, K., Dragsted, L. O., Whey Protein Delays Gastric Emptying and Suppresses Plasma Fatty Acids and Their Metabolites Compared to Casein, Gluten, and Fish Protein. Journal of Proteome Research 2014, 13, 2396-2408.
Treibmann et al., 2020	Treibmann, S., Händler, S., Hofmann, T., Henle, T., MG-HCr, the Methylglyoxal-Derived Hydroimidazolone of Creatine, a Biomarker for the Dietary Intake of Animal Source Food. Journal of Agricultural and Food Chemistry 2020, 68, 4966-4972.
Tulipani et al., 2011	Tulipani S, Llorach R, Jáuregui O, López-Uriarte P, Garcia-Aloy M, Bullo M, et al. Metabolomics Unveils Urinary Changes in Subjects with Metabolic Syndrome following 12-Week Nut Consumption. Journal of Proteome Research. 2011;10(11):5047-58.
Ulaszewskaet al., 2020	Ulaszewska, M. M., Koutsos, A., Trošt, K., Stanstrup, J., Garcia-Aloy, M., Scholz, M., Fava, F., Natella, F., Scaccini, C., Vrhovsek, U., Tuohy, K., Lovegrove, J., Mattivi, F., Two apples a day modulate human:microbiome co-metabolic processing of polyphenols, tyrosine and tryptophan. Eur J Nutr 2020, Online ahead of print.
van der Hooft et al., 2012	van der Hooft JJJ, de Vos RCH, Mihaleva V, Bino RJ, Ridder L, de Roo N, et al. Structural Elucidation and Quantification of Phenolic Conjugates Present in Human Urine after Tea Intake. Analytical Chemistry. 2012;84(16):7263-71.
van Dorsten et al., 2010	van Dorsten FA, Grün CH, van Velzen EJJ, Jacobs DM, Draijer R, van Duynhoven JPM. The metabolic fate of red wine and grape juice polyphenols in humans assessed by metabolomics. Molecular Nutrition & Food Research. 2010;54(7):897-908.
Vazquez Manjarrez et al., 2019	Vázquez-Manjarrez, N., Weinert, C. H., Ulaszewska, M. M., Mack, C. I., et al., Discovery and Validation of Banana Intake Biomarkers Using Untargeted Metabolomics in Human Intervention and Cross-sectional Studies. The Journal of Nutrition 2019, 149, 1701-1713.
Vázquez-Fresno et al., 2012	Vázquez-Fresno R, Llorach R, Alcaro F, Rodríguez MÁ, Vinaixa M, Chiva-Blanch G, et al. 1H‐NMR‐based metabolomic analysis of the effect of moderate wine consumption on subjects with cardiovascular risk factors. ELECTROPHORESIS. 2012;33(15):2345-2354.
Vázquez-Fresno et al., 2015	Vázquez-Fresno R, Llorach R, Urpi-Sarda M, Khymenets O, Bulló M, Corella D, et al. An NMR metabolomics approach reveals a combined-biomarkers model in a wine interventional trial with validation in free-living individuals of the PREDIMED study. METABOLOMICS. 2015;11(4):797-806.
wang et al., 2017	Wang Q, Chen X, Ren Y, Chen Q, Meng Z, Cheng J, et al. Toxicokinetics and internal exposure of acrylamide: new insight into comprehensively profiling mercapturic acid metabolites as short-term biomarkers in rats and Chinese adolescents. Arch Toxicol. 2017;91:2107–18.
Watzek et al., 2012	Watzek N, Scherbl D, Feld J, Berger F, Doroshyenko O, Fuhr U, et al. Profiling of mercapturic acids of acrolein and acrylamide in human urine after consumption of potato crisps. Mol Nutr Food Res. 2012;56:1825–37.
Wedekind et al., 2019	Wedekind, R., Keski-Rahkonen, P., Robinot, N., Viallon, V., et al., Syringol metabolites as new biomarkers for smoked meat intake. Am J Clin Nutr 2019, 110, 1424-1433.
Xu et al., 2010	Xu J, Yang S, Cai S, Dong J, Li X, Chen Z. Identification of biochemical changes in lactovegetarian urine using 1H NMR spectroscopy and pattern recognition. Analytical and Bioanalytical Chemistry. 2010;396(4):1451-1463.
Xu et al., 2015	Xu, L., Qu, Y.-H., Chu, X.-D., Wang, R., et al., Urinary levels of N-nitroso compounds in relation to risk of gastric cancer: findings from the shanghai cohort study. PloS one 2015, 10, e0117326-e0117326.
Yeum et al., 2010	Yeum K-J, Orioli M, Regazzoni L, Carini M, Rasmussen H, Russell RM, et al. Profiling histidine dipeptides in plasma and urine after ingesting beef, chicken or chicken broth in humans. Amino Acids. 2010;38(3):847-858.
Yin et al., 2017	Yin X, Gibbons H, Rundle M, Frost G, McNulty BA, Nugent AP, et al. Estimation of chicken intake by adults using metabolomics-derived markers.J Nutr. 2017;147(10):1850–7
Zamora-Ros et al., 2017	Zamora-Ros, R., J. A. Rothwell, D. Achaintre, P. Ferrari, M.-C. Boutron-Ruault, F. R. Mancini, et al. (2017). "Evaluation of urinary resveratrol as a biomarker of dietary resveratrol intake in the European Prospective Investigation into Cancer and Nutrition (EPIC) study." British Journal of Nutrition 117,(11): 1596-1602.
Zheng et al., 2015	Zheng, H., Yde, C. C., Clausen, M. R., Kristensen, M., et al., Metabolomics Investigation To Shed Light on Cheese as a Possible Piece in the French Paradox Puzzle. Journal of Agricultural and Food Chemistry 2015, 63, 2830-2839.
Zhou et al., 2019	Zhou, X., Gao, Q., Praticò, G., Chen, J., Dragsted, L. O., Biomarkers of tuber intake. Genes & nutrition 2019, 14, 9-9.
Zhou et al., 2020	Zhou, X., Ulaszewska, M. M., Cuparencu, C., De Gobba, C., Vázquez Manjarrez, N., Gürdeniz, G., Chen, J., Mattivi, F., Dragsted, L. O., Urine metabolome profiling reveals imprints of food heating processes after dietary intervention with differently cooked potatoes. Journal of Agricultural and Food Chemistry 2020, 68, 6122–6131.
Zhu et al., 2014	Zhu, Y., Shurlknight, K. L., Chen, X. & Sang, S. Identification and pharmacokinetics of novel alkylresorcinol metabolites in human urine, new candidate biomarkers for whole-grain wheat and rye intake. J. Nutr. 144, 114–122 (2014).

## Sheet: Supporting data 2 
	Foods consumed frequently by the UK population reported to have putative urine biomarkers*	Example Foods used in the MAIN study menu design	No. of putative urine biomarkers
	Beverages
	Tea	Weak black tea, Medium strength back tea	95
	Coffee	Instant coffee, Wholebean coffee	43
	Confectionary/ Sweetened drinks
	Cocoa products/chocolate	High cocoa chocolate bar, Low cocoa chocolate (high fat) bar, High cocoa hot drink, Low cocoa (high fat) hot drink	68
	Sugar sweetened cereals/soft drinks /confectionary	Sweetened breakfast cereals: Frosties, Sugar puffs. Drinks: Coca cola A range of other foods with added sugar e.g chocolate bar/hot chocolate	11
	Artificially sweetened drinks	Diet coca cola	5
	Alcoholic Drinks
	Wine	Red wine, White wine	63
	Beer	beer	1
	Fruit & Vegetables
	General Fruit & Vegetables	Banana (whole and banana loaf), Lettuce, Red onion, Sweetcorn, Broccoli, Red berry smoothie, Carrot, Mixed berries, Spinach, Mushrooms, Raisins, Apple juice, Whole Yellow Pepper, Apple, Chicken tikka curry, peas, Mixed baked beans, Tomatoes, Cucumber, Canned pears, Whole Pear, Bolognese complex meal, Garlic bread, Red grape juice, Red grapes, Cauliflower, Mushy peas, White grape juice, Sparkling …	28
	Specific Fruit
	Apple	Whole apple, Apple juice, Apple pie, Fruit smoothie	86
	Apple and Pear	Whole Pear, Canned pears in own juice	1
	Banana	Whole banana and Banana loaf	5
	Grapes	White grape products: White grapes, White grape juice, Sparkling white grape juice, White wine Red grape products: Red grapes, juice, Sparking red grape juice, Red wine, Raisins, Fruit smoothie	31
	Strawberries/red berries	Mixed berries, Strawberries, Fruit smoothie	18
	Tomatoes	Whole tomatoes, Mixed baked beans in tomato sauce, Chicken tikka curry, Bolognese complex meal	6
	Specific Vegetables
	Cruciferous vegetables	Brassica: Broccoli, Coleslaw (cabbage), Cauliflower and other vegetables	18
	Onion/Garlic	Alliums: Red onion, Coleslaw (onions), Garlic bread, Chicken tikka curry (with onion)	14
	Starchy Foods/Vegetable protein
	Legumes (peas, beans, peanuts, soya)	Garden peas, Mushy peas, Baked beans, Soya milk	50
	Soya products	Soya milk	5
	Nuts	Almonds, Peanuts	55
	Potatoes	Microwave Chips, Oven chips, Potato waffles, Boiled potatoes, Baked potato	2
	Cereal products, pasta, rice
	White bread	Refined white sliced bread	7
	Wholegrain general	Sourdough rye bread, Light rye bread, Wholegrain wheat bread, Wholegrain kibbled wheat bread, Wholegrain pasta, Wholegrain bread, Porridge	25
	Wholegrain rye	Sourdough rye bread, Light rye bread,	20
	Baked or toasted products
	Strongly Heated Foods/Baked or Toasted grain products	Heated meat, Heat-treated foods (Steak pie, Sausage roll, Breakfast cereals, Roasted meats)	11
	Fried foods	Microwave chips, Oven chips, Potato waffles, Fried egg	15
	Smoked foods	Bacon	4
	Eggs and Dairy
	General Dairy	Semi-skimmed milk, Cream, Yoghurt, Butter	4
	Cheese and other diary products	Processed cheese slices, Spreadable cheese	15
	Meats
	General meat	Fish: Salmon, Tuna, Prawns, Cod fish fingers. Processed meat: Ham, Bacon, Salami, Pork sausage, Sausage roll, Beef burger, Steak pie. Red meat/complex meal: Steak pie, Bolognese complex meal. Poultry: chicken	16
	Red meat	Processed meat: Ham, Bacon, Salami, Pork sausage, Sausage roll, 100% beef burger, Steak pie. Red meat/complex meal: Steak pie, Bolognese complex meal	19
	Processed meats (inc. cured, smoked)	Processed meat: Ham, Bacon, Salami, Pork sausage, Sausage roll, Beef burger, Steak pie	3
	Poultry	Chicken	4
	Fish (white/all)	Cod fish fingers	5
	Fish (oily, Fatty)	Salmon, Tuna,	5
	Shellfish	Prawns	4
	Poultry and Fish	Chicken, Salmon, Tuna, Cod fish fingers, Prawns	2
	Other meat (offal)	None	1

## Sheet: Supporting  data 3
	Food group	Dietary Component	Putative Urine Biomarker	Chromatography Mode	Potential habitual use as a dietary exposure biomarker?	Comments	Key References	Supplier of chemical standard
	Alchoholic Drinks	Alcohol	Ethyl-beta-D-glucuronide	HILIC	*	Detectable for up to 22.5–31.5 h post consumption	Dahl et al., 2002	1
	Alchoholic Drinks	Wine	Resveratrol	RP	**	Increased in 24 h urine samples and validated by 24 h dietary recall	Zamora-Ros et al., 2017	1
	Beverages	Coffee	Chlorogenic acid	RP	**	Increased in 24 h urine collections	Ito et al., 2007	2
	Beverages	Coffee	Dihydrocaffeic acid#	RP	**	Post-prandial excretion peaking at 5-8h dihydrocaffeic acid-3-O-sulfate#	stalmach et al., 2009	2
	Beverages	Coffee	Ferulic acid-4-O-sulfate	RP	**	Post-prandial excretion peaking at 0.6-4.3h	stalmach et al., 2009	3
	Beverages	Coffee	Feruloylglycine	RP	*	Present in FMV urine (>12 h after consumption)	Lloyd et al., 2019	4
	Beverages	Coffee	m-Coumaric acid#	RP	**	Validated by 24 h recall data and habitual FFQ data using 24 hour urine. m-Coumaric acid sulfate#	Edmands et al., 2015	2
	Beverages/Confectionary/ Sweetened drinks	Cocoa	3-Methyl xanthine	RP	*	Post-prandial excretion peaking at 18.25 h	Martínez-López et al., 2014b	2
	Beverages/Confectionary/ Sweetened drinks	Cocoa	7-Methyl xanthine	RP	*	Post-prandial excretion peaking at 20.73h	Martínez-López et al., 2014b	2
	Beverages/Confectionary/ Sweetened drinks	Cocoa / Tea	Caffeic acid#	RP	**	Post-prandial excretion peaking at 2h Caffeic acid-3-O-sulfate#	stalmach et al., 2009	2
	Beverages/Confectionary/ Sweetened drinks	Coffee/Cocoa	Caffeine	RP	**	Post-prandial excretion peaking at 6 h	Martínez-López et al., 2014b	5
	Beverages/Confectionary/ Sweetened drinks	Cocoa	Vanillic acid	RP	*	Increased in 24 h urine collections and validated by 24 h recall and FFQ Vanillic acid glucuronide and sulfate*	Edmands et al., 2015	2
	Confectionary/ Sweetened drinks	Sweetener	Acesulfame-K	RP	*	Present in FMV urine (>12 h after consumption)	Willis et al., 2020	2
	Confectionary/ Sweetened drinks	Sugary Foods & Drinks	Sucrose	HILIC	*	Present in FMV urine (>12 h after consumption)	Lloyd et al., 2019	6
	General Fruit & Vegetables	Fruit & Vegetables	3-Hydroxyhippuric acid	RP	*	Increased in 12 h urine and present up to 60 h	Rechner, et al., 2002	3
	General Fruit & Vegetables	Fruit & Vegetables	4-Hydroxyhippuric acid	RP	*	Increased in 12h urine and present up to 60 h	Rechner, et al., 2002	7
	General Fruit & Vegetables	Fruit & Vegetables	Hippuric acid	RP	**	Increased in 24 h urine	Krupp et al., 2012	5
	Specific Fruit	Citrus	4-Hydroxyproline betaine	HILIC	*	Present up to 8 h in post-prandial urine and associated with habitual citrus exposure as recorded by an FFQ	Lloyd et al., 2011a	8
	Specific Fruit	Banana	Dopamine-3-O-sulfate#	HILIC	*	Post-prandial excretion peaking 4-6h, still elevated 12 h. Validated using 24 urine. Dopamine sulfate and Dopamine#	Vazquez Manjarrez et al., 2019	1
	Specific Fruit	Banana	Dopamine-4-O-sulfate#	HILIC	*	Post-prandial excretion peaking 4-6h, still elevated 12 h. Validated using 24 urine. Dopamine sulfate and Dopamine#	Vazquez Manjarrez et al., 2019	1
	Specific Fruit	Strawberries/red berries	Furaneol#	RP	*	Present in FMV urine (>12 h after consumption) sulfate and glucuonide#	Willis et al., 2020	2
	Specific Fruit	Citrus (grapefruit)	Naringenin	RP	**	Post-prandial excretion peaking at 4-8 h	Erlund et al., 2001	2
	Specific Fruit	Grapes /wine/ red berries	p-Coumaric acid	RP	*	Increased in 24 hour urine after wine	Boto-Ordóñez et al., 2013	2
	Specific Fruit	Citrus	Proline betaine	HILIC	*	Post-prandial excretion peaking at 8 h and associated with habitual citrus exposure as recorded by FFQ.	Lloyd et al., 2011a	8
	Specific Fruit	Apple	Rhamnitol	HILIC	*	Present in FMV urine (>12 h after consumption)	Lloyd et al., 2019	1
	Specific Fruit	Grapes	Tartarate	HILIC	*	Post-prandial excretion peaking at 4-8 h, back to baseline within 24 h	Garcia-Perez et al. 2016	5
	Specific Fruit/veg	Onion and tomato	Quercetin	RP	**	Increased in 24 h urine collections	Shi et al., 2015	9
	Specific Fruit/veg	Onion and tomato	Quercetin-3-O-b-D-glucuronide	RP	*	Post-prandial excretion peaking at 4 h, back to baseline between 8-24 h	Mullen et al., 2007	8
	Specific Vegetables	Cruciferous Vegetables	D,L-Sulforaphane L-cysteine	RP	*	Increased in FMV urine (>12 h after consumption)	Hauder et al., 2011	3
	Specific Vegetables	Cruciferous Vegetables	D,L-Sulforaphane-N-acetyl-L-cysteine	RP	*	Present in FMV urine (>12 h after consumption)	Lloyd et al., 2019	3
	Cereal products, pasta, rice	Wholegrain / Rye	BOA (1,3-Benzoxazol-2-one)	RP	**	Increased in 24 h urine collections	Beckmann et al., 2013	3
	Cereal products, pasta, rice	Wholegrain	DHBA (3,5-Dihydroxybenzoic acid)	RP	**	Post-prandial excretion peaking at 8.3 h	Zhu et al., 2014	2
	Cereal products, pasta, rice	WholeGrain	DHBA-3-O-sulfate	RP	**	Post-prandial excretion peaking at 6-9 h	Zhu et al., 2016	3
	Cereal products, pasta, rice	Wholegrain	DHPPA (3-(3,5-Dihydroxyphenyl)-1-propanoic acid)	RP	**	Post-prandial excretion peaking at 7.4 h	Zhu et al., 2014	2
	Cereal products, pasta, rice	Wholegrain	DHPPA-3-sulfate	HILIC	**	Post-prandial excretion peaking at 4-6 hours	Zhu et al., 2016	1
	Meats and fish	Meat (general)	1-Methyl histidine	HILIC	**	Increased in 24 h urine collections	Altorf-van der Kuil et al., 2013	2
	Meats and fish	Poultry / Fish	3-Methyl histidine	HILIC	**	Increased in 24 h urine	Cheung et al., 2017	2
	Meats and fish	Meat (processed)	Carnitine	HILIC	**	Increased in 24 h urine collections	Heinzmann,et al., 2012	2
	Meats and fish	Red meat	Carnosine	HILIC	**	Increased in 24 h urine collections and associated with habitual meat exposure as recorded by 24 h dietary recall	Yeum et al., 2010	2
	Meats and fish	Meat (general)	Creatinine	HILIC	**	Increased in 24 h urine collections	Cross et al., 2011	10
	Meats and fish	Poultry	L-Anserine	HILIC	*	Present in FMV urine (>12 h after consumption)	Lloyd et al., 2019	3
	Meats and fish	Meat (general)	Taurine	HILIC	**	Increased in 24 h urine collections	Cross et al., 2011	5
	Meats and fish	Fish/Shellfish	Trimethylamine-N-oxide	HILIC	*	present in FMV urine (>12 h after consumption)	Lloyd et al., 2019	11
	Starchy Foods/Vegetable protein	Potatoes	Calystegine A3	HILIC	*	Present in FMV urine (>12 h after consumption)	Beckmann et al., 2020	12
	Starchy Foods/Vegetable protein	Potatoes	Calystegine B2/B1	HILIC	*	Present in FMV urine (>12 h after consumption)	Beckmann et al., 2020	12
	Starchy Foods/Vegetable protein	Soy products	Daidzein (4',7-Dihydroxyisoflavone)	RP	*	Maximum excretion 6-12 hours post consumption, still elevated after 18-35 h	King and Bursill 1998	9
	Starchy Foods/Vegetable protein	Legumes	Pyrogallol#	RP	*	Present in FMV urine (>12 h after consumption) sulfate and glucuonide#	Willis et al., 2020	2
	Starchy Foods/Vegetable protein	Legumes	Trigonelline	HILIC	*	Present in FMV urine (>12 h after consumption)	Willis et al., 2020	2
	Baked or toasted products	Strongly Heated Foods	N-(2-Furoyl)glycine	RP	*	Present in FMV urine (>12 h after consumption)	Willis et al., 2020	2
	Mixed	Polyphenol rich foods	Epicatechin(-)	RP	**	Increased in 24 h urine collections	Ito et al., 2007	2
	Mixed	Polyphenol rich foods	Ferulic acid	RP	**	Increased in 24 h urine	Gonthier et al., 2003	2
	Mixed	Polyphenol/Anthocyanin rich foods	Ferulic acid-4-O-b-D-glucuronide	RP	**	Post-prandial excretion peaking at 3.5 h	Agulló et al., 2020	1
	Mixed	Fruit/Grapes/Tea/wine	Gallic acid	HILIC	**	Increased in 24 h urine after drinking wine	Boto-Ordóñez et al., 2013	2
	Mixed	Anthocyanin rich foods	Protocatechuic acid	RP	*	Detectable for up to 24 h, then back to baseline	Nurmi et al., 2009	2
	HILIC (Hydrophilic Interaction Liquid Chromatography); Reverse Phase (RP)
	# Normally the conjugated forms detected; the impact/use of the selected metabolite as a potential biomarker of habitual dietary exposure where * = Possible and ** = Likely.
	Supplier of chemical standard: 1, TRC Canada; 2, Sigma; 3, Santa Cruz; 4, Donated by A. Crozier (UC Davis); 5, BDH; 6, Fisher; 7, Enamine; 8, Extrasynthese; 9, Alfa Aesar; 10, Acros; 11, Fluka; 12, Donated by R. Nash (Phytoquest)
	References
	Agulló et al., 2020	Agulló, V., D. Villaño, C. García-Viguera and R. Domínguez-Perles. (2020). "Anthocyanin Metabolites in Human Urine after the Intake of New Functional Beverages." Molecules 25,(2).371
	Altorf-van der Kuil et al., 2013	Altorf-van der Kuil, W., Brink, E. J., Boetje, M., Siebelink, E., et al., Identification of biomarkers for intake of protein from meat, dairy products and grains: a controlled dietary intervention study. British Journal of Nutrition 2013, 110, 810-822.
	Beckmann et al., 2013	Beckmann, M., A. J. Lloyd, S. Haldar, C. Seal, K. Brandt and J. Draper. (2013). "Hydroxylated phenylacetamides derived from bioactive benzoxazinoids are bioavailable in humans after habitual consumption of whole grain sourdough rye bread." Molecular Nutrition & Food Research 57,(10): 1859-1873.
	Beckmann et al., 2020	Beckmann, M., A.J., L., Wilson, T., Torres, D., Goios, A., Willis, N., Lyons L., et al., Calystegines are potential urine biomarkers for dietary exposure to potato products. Mol Nutr Food Res 2020, 64,(20): 2000515.
	Boto-Ordóñez et al., 2013	Boto-Ordóñez M, Urpi-Sarda M, Queipo-Ortuño MI, Corella D, Tinahones FJ, Estruch R, et al. Microbial Metabolomic Fingerprinting in Urine after Regular Dealcoholized Red Wine Consumption in Humans. Journal of Agricultural and Food Chemistry. 2013;61(38):9166-75.
	Cheung et al., 2017	Cheung, W., P. Keski-Rahkonen, N. Assi, P. Ferrari, H. Freisling, S. Rinaldi, et al. (2017). "A metabolomic study of biomarkers of meat and fish intake." Am J Clin Nutr 105,(3): 600-608.
	Cross et al., 2011	Cross AJ, Major JM, Sinha R. Urinary Biomarkers of Meat Consumption. Cancer Epidemiology Biomarkers &amp; Prevention. 2011;20(6):1107-11.
	Dahl et al., 2002	Dahl, H., N. Stephanson, O. Beck and A. Helander. (2002). "Comparison of Urinary Excretion Characteristics of Ethanol and Ethyl Glucuronide." Journal of Analytical Toxicology 26,(4): 201-204.
	Edmands et al., 2015	Edmands, W. M., Ferrari, P., Rothwell, J. A., Rinaldi, S., et al., Polyphenol metabolome in human urine and its association with intake of polyphenol-rich foods across European countries. The American Journal of Clinical Nutrition 2015, 102, 905-913.
	Erlund et al., 2001	Erlund, I., E. Meririnne, G. Alfthan and A. Aro. (2001). "Plasma Kinetics and Urinary Excretion of the Flavanones Naringenin and Hesperetin in Humans after Ingestion of Orange Juice and Grapefruit Juice." The Journal of Nutrition 131,(2): 235-241
	Garcia-Perez et al., 2016	Garcia-Perez, I., Posma, J. M., Chambers, E. S., Nicholson, J. K., et al., An Analytical Pipeline for Quantitative Characterization of Dietary Intake: Application To Assess Grape Intake. J Agric Food Chem 2016, 64, 2423-2431.
	Gonthier et al., 2003	Gonthier, M.-P., L. Y. Rios, M.-A. Verny, C. Rémésy and A. Scalbert. (2003). "Novel liquid chromatography–electrospray ionization mass spectrometry method for the quantification in human urine of microbial aromatic acid metabolites derived from dietary polyphenols." Journal of Chromatography B 789,(2): 247-255.
	Hauder et al., 2011	Hauder J, Winkler S, Bub A, Rüfer CE, Pignitter M, Somoza V. LC-MS/MS Quantification of Sulforaphane and Indole-3-carbinol Metabolites in Human Plasma and Urine after Dietary Intake of Selenium-Fortified Broccoli. Journal of Agricultural and Food Chemistry. 2011;59(15):8047-57.
	Heinzmann et al., 2012	Heinzmann SS, Merrifield CA, Rezzi S, Kochhar S, Lindon JC, Holmes E, et al. Stability and Robustness of Human Metabolic Phenotypes in Response to Sequential Food Challenges. Journal of Proteome Research. 2012;11(2):643-55.
	Ito et al., 2007	Ito, H., M.-P. Gonthier, C. Manach, C. Morand, L. Mennen, C. Rémésy, et al. (2007). "Polyphenol levels in human urine after intake of six different polyphenol-rich beverages." British Journal of Nutrition 94,(4): 500-509.
	King and Bursill 1998	King, R. A. and D. B. Bursill. (1998). "Plasma and urinary kinetics of the isoflavones daidzein and genistein after a single soy meal in humans." Am J Clin Nutr 67,(5): 867-872
	Krupp et al., 2012	Krupp, D., N. Doberstein, L. Shi and T. Remer. (2012). "Hippuric Acid in 24-Hour Urine Collections Is a Potential Biomarker for Fruit and Vegetable Consumption in Healthy Children and Adolescents." The Journal of Nutrition 142,(7): 1314-1320.
	Lloyd et al., 2011	Lloyd, A. J., M. Beckmann, G. Favé, J. C. Mathers and J. Draper. (2011). "Proline betaine and its biotransformation products in fasting urine samples are potential biomarkers of habitual citrus fruit consumption." British Journal of Nutrition 106,(6): 812-824.
	Lloyd et al., 2019	Lloyd, A. J., N. D. Willis, T. Wilson, H. Zubair, L. Xie, E. Chambers, et al. (2019). "Developing a Food Exposure and Urine Sampling Strategy for Dietary Exposure Biomarker Validation in Free-Living Individuals." Molecular Nutrition & Food Research 63,(14): 1900062.
	Martínez-López et al., 2014	Martinez-Lopez S, Sarria B, Gomez-Juaristi M, Goya L, Mateos R, Bravo-Clemente L. Theobromine, caffeine, and theophylline metabolites in human plasma and urine after consumption of soluble cocoa products with different methylxanthine contents. Food Res Int. 2014;63:446-55.
	Mullen et al., 2007	Mullen, W., C. A. Edwards and A. Crozier. (2007). "Absorption, excretion and metabolite profiling of methyl-, glucuronyl-, glucosyl- and sulpho-conjugates of quercetin in human plasma and urine after ingestion of onions." British Journal of Nutrition 96,(1): 107-116.
	Nurmi et al., 2009	Nurmi, T., J. Mursu, M. Heinonen, A. Nurmi, R. Hiltunen and S. Voutilainen. (2009). "Metabolism of Berry Anthocyanins to Phenolic Acids in Humans." Journal of Agricultural and Food Chemistry 57,(6): 2274-2281.
	Rechner, et al., 2002	Rechner, A. R., G. Kuhnle, P. Bremner, G. P. Hubbard, K. P. Moore and C. A. Rice-Evans. (2002). "The metabolic fate of dietary polyphenols in humans." Free Radical Biology and Medicine 33,(2): 220-235.
	Shi et al., 2015	Shi Y, Williamson G. Comparison of the urinary excretion of quercetin glycosides from red onion and aglycone from dietary supplements in healthy subjects: a randomized, single-blinded, cross-over study. Food Funct. 2015;6:1443–8.
	stalmach et al., 2009	Stalmach, A., W. Mullen, D. Barron, K. Uchida, T. Yokota, C. Cavin, et al. (2009). "Metabolite Profiling of Hydroxycinnamate Derivatives in Plasma and Urine after the Ingestion of Coffee by Humans: Identification of Biomarkers of Coffee Consumption." Drug Metabolism and Disposition 37,(8): 1749-1758.
	Vazquez Manjarrez et al., 2019	Vázquez-Manjarrez, N., Weinert, C. H., Ulaszewska, M. M., Mack, C. I., et al., Discovery and Validation of Banana Intake Biomarkers Using Untargeted Metabolomics in Human Intervention and Cross-sectional Studies. The Journal of Nutrition 2019, 149, 1701-1713.
	Willis et al., 2020	Willis, N. D., A. J. Lloyd, L. Xie, M. Stiegler, K. Tailliart, I. Garcia-Perez, et al. (2020). "Design and characterization of a randomized food intervention that mimics exposure to a typical UK diet to provide urine samples for identification and validation of metabolite biomarkers of food intake." Frontiers in Nutrition, 7,(200).
	Yeum et al., 2010	Yeum K-J, Orioli M, Regazzoni L, Carini M, Rasmussen H, Russell RM, et al. Profiling histidine dipeptides in plasma and urine after ingesting beef, chicken or chicken broth in humans. Amino Acids. 2010;38(3):847-858.
	Zamora-Ros et al., 2017	Zamora-Ros, R., J. A. Rothwell, D. Achaintre, P. Ferrari, M.-C. Boutron-Ruault, F. R. Mancini, et al. (2017). "Evaluation of urinary resveratrol as a biomarker of dietary resveratrol intake in the European Prospective Investigation into Cancer and Nutrition (EPIC) study." British Journal of Nutrition 117,(11): 1596-1602.
	Zhu et al., 2014	Zhu, Y., Shurlknight, K. L., Chen, X. & Sang, S. Identification and pharmacokinetics of novel alkylresorcinol metabolites in human urine, new candidate biomarkers for whole-grain wheat and rye intake. J. Nutr. 144, 114–122 (2014).
	Zhu et al., 2016	Zhu, Y., P. Wang, W. Sha and S. Sang. (2016). "Urinary Biomarkers of Whole Grain Wheat Intake Identified by Non-targeted and Targeted Metabolomics Approaches." Scientific Reports 6,(1): 36278.

## Sheet: Supporting  data 4
Biomarker number codes for Figures in main text	Biomarker number	Biomarker	Chromatography Mode	Retention Time (Rt)	Ionisation mode	Adduct	Parent m/z	Tube Lens Voltage (V)	Qualifier Product (Q3) m/z			Collision Energy (V)			Quantification Product m/z	Limitations of Measurment		Biomarker concentration in First Morning Void (FMV) urine			Relationship between biomarker concentrations of FMV and 24hr urine samples
									SRM1	SRM2	SRM3	SRM1	SRM2	SRM3		LoD	LoQ	Median	Min	Max
																[µg ml-1]		[µg ml-1]			p-value of rank correlation	Spearman Rank Correlation (ρ)
1	1	1-Methyl histidine	HILIC	9.58575	Positive	[M+H]1+	170.064	82	81.282	83.264	124.16	39	23	14	124.16	0.00142	0.00472	22.5731	6.34061	66.2797	0	0.67
2	2	3-Hydroxyhippuric acid	RP	3.87945	Negative	[M-H]1-	194.064	129	92.246	93.252	150.113	28	18	13	92.246	0.00059	0.00197	3.85196	0.203041	44.2628	0	0.85
3	3	3-Methyl histidine	HILIC	10.381	Positive	[M+H]1+	170.059	80	95.345	96.351	126.165	32	20	13	95.345	0.00114	0.00381	19.9019	1.04559	263.864	0	0.91
4	4	3-Methyl xanthine	RP	3.38369	Positive	[M+H]1+	167.096	89	94.22	96.302	124.152	22	20	16	94.22	0.00234	0.00779	1.55435	0.0177354	12.3277	0	0.9
5	5	4-Hydroxyhippuric acid	RP	3.6511	Negative	[M-H]1-	194.073	104	74.331	93.302	100.24	23	19	12	100.24	0.00059	0.00197	3.3316	0.577625	30.0294	0	0.82
6	6	4-Hydroxyproline betaine	HILIC	9.18937	Positive	[M+H]1+	160.167	71	44.461	58.504	88.367	36	33	20	88.367	0.00048	0.00158	0.199604	0.034335	21.3484	0	0.94
7	7	7-Methyl xanthine	RP	3.23068	Positive	[M+H]1+	167.085	80	69.384	124.185	150.13	30	18	18	150.13	0.00048	0.00158	1.56729	0.023939	12.7887	0	0.9
8	8	Acesulfame-K	RP	3.19	Negative	[M-H]1-	161.947	86	82.233	78.16	64.226	17	40	49	82.233	0.00013	0.00042	0.00624281	0.000410819	18.8459	0	0.73
9	9	BOA (1,3-Benzoxazol-2-one)	RP	5.51782	Positive	[M+H]1+	136.055	88	80.292	65.014	108.19	22	27	17	80.292	0.00011	0.00036	0.0210526	0.00264858	0.0557375	0.325	-0.1
10	10	Caffeic acid	RP	4.64825	Negative	[M-H]1-	179.022	108	135.337	134.003	106.931	16	25	22	135.328	0.00133	0.00443	0.587863	0.162609	1.16843	0	0.63
11	11	Caffeine	RP	4.81305	Positive	[M+H]1+	195.06	96	138.138	110.204	42.052	19	23	37	138.138	0.00011	0.00036	0.213441	0.00148747	2.49236	0	0.82
12	12	Calystegine A3	HILIC	10.1879	Positive	[M+H]1+	160.1	76	142.14	125.12	79.31	11	15	23	142.14	0.00142	0.00472	0.0976925	0.000778892	1.47707	0	0.57
13	13	Calystegine B2/B1	HILIC	10.6053	Positive	[M+H]1+	176.081	73	140.191	158.026	97.137	12	6	16	140.191	0.00011	0.00036	0.110453	0.00183112	0.782051	0	0.48
14	14	Carnitine	HILIC	9.53268	Positive	[M+H]1+	162.153	71	60.541	85.357	103.301	16	20	16	103.301	7e-05	0.00024	6.31046	0.261755	42.6788	0	0.81
15	15	Carnosine	HILIC	11.6367	Positive	[M+H]1+	227.064	80	110.202	156.058	209.97	23	15	11	110.202	9e-05	0.0003	0.608815	0.118013	8.34964	0	0.62
16	16	Chlorogenic acid	RP	4.49074	Positive	[M+H]1+	355.056	116	162.99	89.197	145.021	13	55	30	162.99	0.00222	0.00741	0.0128088	0.000669025	0.117051	0	0.44
17	17	Creatinine	HILIC	8.00034	Positive	[M+H]1+	114.129	89	43.452	44.695	86.318	37	18	12	44.695	9e-05	0.0003	1517.64	478.538	5260.67	0	0.72
18	18	D,L-Sulforaphane L-cysteine	RP	4.68858	Positive	[M+H]1+	299.003	78	114.103	72.023	55.095	22	39	36	114.103	0.00024	0.00081	0.00257031	0.00015235	0.0529443	0.0222	0.24
19	19	D,L-Sulforaphane-N-acetyl-L-cysteine	RP	3.65726	Positive	[M+H]1+	341.014	115	55.214	114.098	119.04	39	23	27	114.098	0.00059	0.00197	0.012167	0.000367178	0.740741	0	0.63
20	20	Daidzein (4',7-Dihydroxyisoflavone)	RP	4.68858	Positive	[M+H]1+	255.057	80	91.364	137.206	199.183	35	26	23	199.183	0.00114	0.00381	0.00116531	0.000252271	0.0130586	0.0296	0.23
21	21	DHBA (3,5-Dihydroxybenzoic acid)	RP	3.38	Negative	[M-H]1-	153.01	110	109.094	65.271	67.232	13	13	18	109.094	0.00142	0.00472	0.0863879	0.0106849	0.323358	0	0.42
22	22	DHBA-3-O-sulfate	RP	2.75	Negative	[M-H]1-	232.88	121	152.988	109.099	65.34	19	25	28	152.988	0.00059	0.00197	2.26065	0.112645	28.5384	0.0025	0.31
23	23	DHPPA (3-(3,5-Dihydroxyphenyl)-1-propanoic acid)	RP	4.13242	Negative	[M-H]1-	181.044	106	95.234	122.132	137.132	19	21	12	137.132	0.00059	0.00197	0.159537	0.0145952	1.09174	0	0.68
24	24	DHPPA-3-sulfate	HILIC	15.9757	Negative	[M-H]1-	260.95	117	95.225	137.124	181.047	37	24	18	95.225	0.00087	0.00289	0.297043	0.0492212	0.848478	0	0.7
25	25	Dihydrocaffeic acid	RP	4.50389	Negative	[M-H]1-	181.04	106	137.35	109.09	135.09	13	16	18	137.35	0.00059	0.00197	0.0561351	0.00151844	2.93566	0.0203	0.24
26	26	Dopamine-3-O-sufate	HILIC	11.16	Negative	[M-H]1-	231.982	55	152.092	122.176	80.103	22	33	40	152.092	0.01181	0.03957	0.04	0	0.29	Missing 24h urine data
27	27	Dopamine-4-O-sufate	HILIC	12.4085	Negative	[M-H]1-	231.982	55	152.092	122.176	80.103	22	33	40	152.092	0.01181	0.03957	1.11	0.58	6.02	Missing 24h urine data
28	28	Epicatechin(-)	RP	4.60581	Positive	[M+H]1+	291.084	109	139.07	123.08	147.051	16	32	22	139.07	0.00257	0.00858	0.00696217	0.00124979	0.117341	0	0.66
29	29	Ethyl-beta-D-glucoronide	HILIC	9.99944	Negative	[M-H]1-	220.997	121	75.237	203.014	158.99	17	12	14	75.237	0.00014	0.00047	0.116886	0.0108942	80.277	0	0.79
30	30	Ferulic acid	RP	5.48129	Positive	[M+H]1+	195.051	97	177.046	145.047	89.213	9	16	32	145.047	0.00169	0.00564	0.00465745	0.000360375	0.0221293	0.2593	0.12
31	31	Ferulic acid-4-O-sulfate	RP	4.47239	Negative	[M-H]1-	273.021	139	134.156	178.071	193.087	29	24	17	193.087	0.00087	0.00289	0.413987	0.0426547	1.97889	0	0.58
32	32	Ferulic acid-4-O-β-D-glucuronide	RP	4.35364	Negative	[M-H]1-	369.054	129	133.927	178.035	193.042	37	28	18	193.042	0.00206	0.00687	0.194534	0.0314315	11.7849	0	0.51
33	33	Feruloylglycine	RP	4.82721	Positive	[M+H]1+	252.039	91	89.205	145.087	177.075	39	21	11	177.075	0.00234	0.00779	0.42403	0.0636363	3.00712	0	0.66
34	34	Furaneol	RP	4.28367	Positive	[M+H]1+	129.063	82	43.288	57.213	101.126	15	17	10	43.288	0.00289	0.00964	0.0210522	0.00416843	0.146822	0.7961	0.03
35	35	Gallic-acid	HILIC	14.1843	Negative	[M-H]1-	169.019	101	125.157	79.385	124.041	15	23	25	125.217	0.00234	0.00779	0.0558836	0.00918286	0.242825	0	0.61
36	36	Hippuric acid	RP	4.78	Positive	[M+H]1+	180.075	94	105.175	77.32	51.479	13	33	54	105.175	0.00059	0.00197	107.151	15.144	249.702	0	0.8
37	37	L-Anserine	HILIC	10.805	Positive	[M+H]1+	241.052	88	95.279	109.159	170.031	41	24	17	109.159	0.00028	0.00093	0.309362	0.0196077	35.6234	0	0.59
38	38	m-Coumaric acid	RP	5.62142	Negative	[M-H]1-	163.051	141	91.242	93.114	119.137	28	30	18	119.137	0.00011	0.00036	0.00751538	9.86926e-06	0.398369	0	0.68
39	39	N-(2-Furoyl)glycine	RP	3.63848	Positive	[M+H]1+	170.092	71	95.296	124.263	152.171	18	10	5	95.296	0.00075	0.0025	0.719977	0.0584671	9.59783	0	0.5
40	40	Naringenin	RP	6.60833	Negative	[M-H]1-	271.083	123	151.076	119.156	107.15	17	26	24	151.076	9e-05	0.0003	0.000770437	0.000290802	0.0228693	0	0.54
41	41	p-Coumaric acid	RP	5.24822	Negative	[M-H]1-	163.044	100	119.168	93.217	91.241	17	37	31	119.168	6e-05	0.00018	0.00833519	0.000446452	0.0691259	0	0.73
42	42	Proline betaine	HILIC	8.1047	Positive	[M+H]1+	144.19	105	42.676	58.543	84.414	40	25	21	84.414	0.00114	0.00381	3.10337	0.094685	67.883	0	0.96
43	43	Protocatechuic acid	RP	3.63647	Negative	[M-H]1-	153.08	81	109.193	108.161	81.354	15	24	21	109.193	0.00059	0.00197	0.0309179	0.00930833	0.0986961	0	0.46
44	44	Pyrogallol	RP	2.57777	Negative	[M-H]1-	125.031	87	79.226	97.124	107.123	19	15	17	79.226	0.00262	0.00872	0.116295	0.0211379	2.15286	0.0251	0.23
45	45	Quercetin	RP	6.51343	Negative	[M-H]1-	301.002	135	151.032	179.017	107.133	21	17	28	151.032	0.00142	0.00472	0.00808937	0.00333059	0.0484349	0.003	0.3
46	46	Quercetin-3-O-b-D-glucuronide	RP	5.5807	Negative	[M-H]1-	477.076	112	300.972	151.01	178.955	22	38	32	300.972	0.00169	0.00564	0.0267969	0.00640833	0.672706	0	0.71
47	47	Resveratrol	RP	6.31797	Positive	[M+H]1+	229.089	93	107.199	165.082	91.233	22	29	30	107.199	0.00048	0.00158	0.0200384	0.00553588	0.103887	0.7109	0.04
48	48	Rhamnitol	HILIC	8.46295	Negative	[M-H]1-	165.146	86	71.393	59.139	147.115	23	29	11	59.139	0.00046	0.00152	0.732602	0.0349687	11.6526	0.0002	0.38
49	49	Sucrose	HILIC	10.8251	Negative	[M-H]1-	341.101	101	59.372	71.266	89.039	36	27	21	89.039	0.00044	0.00146	0.118497	0.0866215	9.19333	0.1924	0.14
50	50	Tartarate	HILIC	13.7327	Negative	[M-H]1-	149.016	95	73.015	87.191	103.2	18	14	13	87.191	0.00087	0.00289	4.17776	0.146855	72.9808	0	0.89
51	51	Taurine	HILIC	11.739	Positive	[M+H]1+	126.126	83	30.67	44.731	108.255	15	18	11	108.255	0.00298	0.00993	17.4806	0.149623	1007.69	0	0.86
52	52	Trigonelline	HILIC	8.88261	Positive	[M+H]1+	138.023	96	92.259	94.207	78.209	21	21	24	92.259	0.00114	0.00381	14.3142	1.09324	88.2599	0	0.81
53	53	Trimethylamine-N-oxide	HILIC	8.90374	Positive	[M+H]1+	76.188	110	42.643	58.517	59.581	36	19	13	58.517	9e-05	0.0003	13.2559	0.521547	228.548	0	0.75
54	54	Vanillic acid	RP	4.76042	Negative	[M-H]1-	169.061	70	152.02	108.151	123.173	17	20	14	152.02	0.00242	0.00806	0.814063	0.0308203	2.90468	0.4087	0.09

## Sheet: Supporting  data 6
		For supplier details:				https://www.shuttlepac.com/information-p650-un3373-adr-iata/about-us-shuttlepac.html
